1 **The type VII secretion system protects *Staphylococcus aureus* against**  
2 **antimicrobial host fatty acids**

3 Arnaud Kengmo Tchoupa<sup>a</sup>, Rebekah A. Jones<sup>a</sup>, Agnès Kuroki<sup>b</sup>, Mohammad Tauqeer  
4 Alam<sup>a</sup>, Sebastien Perrier<sup>a,b,c</sup>, Yin Chen<sup>d</sup>, and Meera Unnikrishnan<sup>a,1</sup>

5 <sup>a</sup>Warwick Medical School, University of Warwick, Coventry CV4 7AL, United Kingdom;

6 <sup>b</sup>Department of Chemistry, University of Warwick, Coventry CV4 7AL, United

7 Kingdom; <sup>c</sup>Faculty of Pharmacy and Pharmaceutical Sciences, Monash University,

8 381 Royal Parade, Parkville, Victoria 3052, Australia; and <sup>d</sup>School of Life Sciences,

9 University of Warwick, Coventry CV4 7AL, United Kingdom

10

11 <sup>1</sup>To whom correspondence should be addressed. Meera Unnikrishnan, Microbiology

12 and Infection Group, Division of Biomedical Sciences, Warwick Medical School,

13 University of Warwick, Coventry CV4 7AL, United Kingdom,

14 Email: M.Unnikrishnan@warwick.ac.uk.

1 **Abstract**

2 The *Staphylococcus aureus* type VII secretion system (T7SS) exports several proteins  
3 that are pivotal for bacterial virulence. The mechanisms underlying T7SS-mediated  
4 staphylococcal survival during infection nevertheless remain unclear. Here we show  
5 that EsxC, a small secreted effector implicated in bacterial persistence, contributes to  
6 *S. aureus* membrane architecture and fluidity. Interestingly, isogenic mutants lacking  
7 EsxC, other T7SS effectors (EsxA and EsxB) or the membrane-bound ATPase EssC  
8 are more sensitive to killing by the host-derived antimicrobial fatty acid, linoleic acid  
9 (LA), compared to the wild-type. We demonstrate that LA induces more cell membrane  
10 damage in the T7SS mutants, although they do not bind differentially to LA. Membrane  
11 lipid profiles show that T7SS mutants are also less able to incorporate LA into their  
12 membrane phospholipids. Proteomic analyses of wild-type and mutant cell fractions  
13 reveal that, in addition to compromising membranes, T7SS defects readily induce  
14 bacterial stress and hamper their response to LA challenge. Together, our findings  
15 indicate that T7SS is crucial for *S. aureus* membrane integrity and homeostasis, which  
16 is critical when bacteria encounter antimicrobial fatty acids.

17

18 **Keywords:** *Staphylococcus aureus*, Type VII secretion system, long-chain  
19 unsaturated free fatty acids.

20

## 1 **Significance**

2 *Staphylococcus aureus* is a major hospital and community-acquired pathogen that can  
3 cause a range of serious infections. Paradoxically, *S. aureus* is a common commensal  
4 inhabitant of skin and nares of healthy individuals, where the bacterium overcomes  
5 colonisation barriers deployed by the innate immune system, which include  
6 antimicrobial, unsaturated fatty acids (FAs). These long chain unsaturated free FAs  
7 are potent activators of the type VII secretion system (T7SS), a molecular machine  
8 that secretes virulence factors that promote *S. aureus* persistence in its host. Here we  
9 demonstrate a role for the T7SS in maintaining staphylococcal membrane  
10 architecture, which enables the bacteria to survive FA toxicity. An increased  
11 vulnerability to FAs might explain why T7SS-defective mutants are less virulent in FA-  
12 rich environments. Thus, therapeutics targeting the T7SS may mitigate *S. aureus*  
13 virulence and render the bacterium more susceptible to FAs.

14

## 15 **Introduction**

16 *Staphylococcus aureus* is a facultative pathogen that can colonize the skin and nares  
17 of healthy individuals. The asymptomatic carriage of *S. aureus* is a major risk for  
18 subsequent infections [1]. *S. aureus* infections, which are either health-care or  
19 community associated, range from benign impetigo to life-threatening bacteraemia  
20 and endocarditis [2]. Clinical management of staphylococcal infections is complicated  
21 by the increasing prevalence of multidrug resistant strains [3].

22 The success of *S. aureus* as a deadly pathogen is attributed to an array of virulence  
23 factors that enables it to strongly adhere to host tissues and evade immune responses  
24 [4]. One of these virulence factors is the type VII secretion system (T7SS), also known

1 as the ESAT-6 secretion system (ESS). The orthologous ESX-1 system was initially  
2 discovered in *Mycobacterium tuberculosis*, where it is essential for bacterial virulence  
3 [5]. T7SSs are found in both Gram-positive and Gram-negative bacteria (T7SSb),  
4 although these systems and their secretion machineries appear to be distinct to their  
5 mycobacterial counterparts [6].

6 Essential components of *S. aureus* T7SS are highly conserved, contrasting with the  
7 high variability within this secretion machinery [7]. In strains where it has been  
8 extensively studied (COL, RN6390, USA300 and Newman), the T7SS is similar and  
9 consists of four integral membrane proteins (EsaA, EssA, EssB and EssC), two  
10 cytosolic proteins (EsaB and EsaG), 5 secreted substrates (EsxA, EsxB, EsxC, EsxD  
11 and EsaD), and EsaE, which interacts with the T7SS substrates to target them to the  
12 secretion apparatus [8]. More recently, a peptidoglycan hydrolase, EssH, which allows  
13 T7SS transport across the bacterial cell wall envelope, was identified in USA300 [9].

14 The molecular architecture of the staphylococcal T7SS has not yet been fully  
15 characterized. T7SS integral membrane proteins EsaA, EssA, EssB, and EssC are  
16 thought to be the core of the T7 secretion machinery, with EssC being the central  
17 membrane transporter [10-12]. Interactions between secreted substrates and co-  
18 dependent secretion of substrates have been demonstrated [8, 13-15]. Recently, the  
19 functional assembly of the type VII secretion machinery, in *S. aureus*, was reported to  
20 be supported by the flotillin homolog FloA within the functional membrane  
21 microdomains [16].

22 *S. aureus* T7SS has been strongly linked to bacterial virulence since its discovery [17].  
23 More specifically, *S. aureus* mutants unable to secrete EsxA or EsxB were defective  
24 in their ability to form kidney abscesses in a murine infection model [10]. In the same

1 mouse infection model, EsaB, EsxC, and EsaD were then shown to be required for *S.*  
2 *aureus* persistence [18, 19]. Likewise, in a murine pneumonia model, deletion of the  
3 whole T7SS in both strains RN6390 and COL led to reduced nasal colonisation and  
4 increased survival of infected mice [14]. In addition, in a *S. aureus* strain from a  
5 different lineage, ST398, T7SS was associated with increased virulence and  
6 epidemiological success [20].

7 Mechanisms by which T7SS effectors modulate host-bacterial interactions are  
8 multifaceted and not yet fully understood. EsxA is necessary to delay apoptosis of *S.*  
9 *aureus*-infected epithelial cells, and EsxA overexpression in these cells is sufficient to  
10 mitigate staurosporine-induced apoptosis [21]. The anti-apoptotic effects of EsxA were  
11 confirmed with human dendritic cells, where EsxB is involved in regulating the  
12 production of regulatory and anti-inflammatory cytokines upon infection with *S. aureus*  
13 [22]. The production of cytokines is also altered in a bacteraemia murine model, when  
14 bacteria are deprived of EsaD or EsaE [15, 23]. *S. aureus* ST398 T7SS and the newly  
15 discovered EsxX substrate contribute to bacterial replication inside human neutrophils,  
16 which are ultimately lysed [20, 24]. While less is understood about the relevance of  
17 T7SS to *S. aureus*, a role for the toxin-antitoxin pair EsaD (or EssD) and EsaG (or  
18 EssI) was demonstrated in intraspecies competition between *S. aureus* strains [8, 15].

19 *S. aureus* is known to tightly control the expression of its virulence factors in response  
20 to a range of environmental cues [25]. T7SS transcription is fine-tuned by intricate  
21 regulators, which comprise the alternative sigma factor  $\sigma^B$ , the global virulence  
22 regulator Agr, and the SaeRS two-component regulatory system [13, 20, 26]. T7SS  
23 expression is downregulated in human whole blood [27], and reduced by *S. aureus*  
24 inside polymorphonuclear neutrophils [28] in order to survive microbicidal azurophilic

1 granule proteins [29]. In contrast, calf-derived pulmonary surfactant, human blood  
2 serum and nasal secretions are potent stimulators of T7 secretion [30, 31].  
3 Interestingly, *S. aureus* T7SS expression is induced in response to host-specific fatty  
4 acids [30-32], but the role of T7SS in bacterial resistance to antimicrobial fatty acids  
5 remains unclear. In this study, we demonstrate that *S. aureus* mutants, which lack the  
6 T7SS substrate EsxC have a defective cell membrane. Intriguingly, these and other  
7 T7SS mutants were more sensitive to an unsaturated fatty acid, linoleic acid (LA),  
8 compared to the wild-type strain. Although there were no differences in direct binding  
9 of LA to the T7SS mutants, LA induced a more leaky membrane in the T7SS mutants.  
10 Cellular proteomics revealed that in addition to membrane discrepancies, T7SS  
11 mutants exhibited different redox and metabolic states, which led to a markedly distinct  
12 response to LA.

13

## 14 **Results**

### 15 **The type VII secreted substrate EsxC alters the staphylococcal membrane** 16 **architecture**

17 EsxC, a small 15-kDa protein secreted by the T7SS, is important for the persistence  
18 of *Staphylococcus aureus* in mice [18]. However, mechanisms underlying EsxC- or  
19 T7SS-mediated bacterial survival are not known. In order to understand the role of  
20 EsxC, we generated an isogenic *esxC* mutant as described previously [33], and  
21 confirmed the absence of any secondary site mutations by whole genome sequencing.  
22  $\Delta$ *esxC* had a similar growth rate to the wild-type (WT) USA300 JE2 strain (Fig. S1).  
23 Intriguingly, when imaged under a fluorescent microscope after staining with the  
24 membrane dye FM 4-64,  $\Delta$ *esxC* was defective in staining compared to WT strain (Fig.

1 1A). This phenotype was reversed upon complementation of  $\Delta esxC$  with a multicopy  
2 plasmid containing the *esxC* gene (Fig. 1A). FM 4-64 fluorescence intensity was  
3 quantified and revealed a clear, statistically significant ( $P < 0.001$ ) difference between  
4 the WT and the mutant (Fig. 1B).

5 As differences in FM 4-64 staining suggest changes in the membrane structure, we  
6 probed this further by assessing membrane fluidity. We used pyrene decanoic acid,  
7 an eximer-forming lipid [31], to measure the fluidity of WT and  $\Delta esxC$  membranes.  
8 Compared to the WT, the cytosolic membrane of the *esxC* mutant was slightly but  
9 consistently more rigid (Fig. 1C). These data indicate that EsxC contributes to *S.*  
10 *aureus* membrane architecture and fluidity.

11

## 12 **EsxC is present on the staphylococcal surface and affects its composition.**

13 As EsxC was initially reported to be secreted [18], it was surprising that this T7SS  
14 substrate would modulate the *S. aureus* membrane (Fig. 1). However, EsxC has been  
15 consistently detected in membrane fractions of RN6390 and USA300 strains [9, 14].  
16 We were able to demonstrate the presence of EsxC in the membrane fractions of the  
17 WT USA300 JE2 strain but not in  $\Delta esxC$  (Fig. 2A). Moreover, we also detected EsxC  
18 in the cell wall fraction from WT (Fig. 2A). To determine if the cell surface location of  
19 EsxC relies on a functional type VII secretion machinery, an isogenic mutant with a  
20 deletion of the membrane bound EssC protein (a core component of the T7SS) was  
21 generated. EsxC was still detected in cell membrane and cell wall preparations of the  
22 WT strain even in the absence of EssC (Fig. 2A).

23 To investigate if the absence of EsxC in both the membrane and the cell wall affects  
24 the bacterial cell surface, we treated intact bacteria (WT or  $\Delta esxC$ ) with trypsin to

1 digest surface proteins and analyse the cell surface proteome (surfome). Intriguingly,  
2 most of the detected proteins (172 out of 218) were less abundant in  $\Delta$ esxC compared  
3 to the WT (Fig. 2B), with 20 proteins below the significance threshold ( $P < 0.05$ ) (Table  
4 1). Only three bacterial cell wall associated proteins were present at significantly  
5 higher levels in  $\Delta$ esxC surfome: the surface protein G, the fibronectin-binding protein  
6 A (FnbA), and the secretory antigen (SsaA).

7 Surprisingly, the majority of proteins (16 out of 20) that were relatively less abundant  
8 in the esxC mutant surfome were predicted or proven to be cytosolic (Table 1).  
9 Proteins that were lowest in abundance (fold change  $< 0.5$ ) were either metabolic  
10 (PfkA, FoID, FabI GatB, and ImdH) or stress-related (Asp23 and putative universal  
11 stress protein) (Fig. 2B). The other less abundant proteins (4) were the  
12 uncharacterised secreted protein A0A0H2XFG6, the iron-regulated surface  
13 determinant protein A lsdA, the putative lipoprotein A0A0H2XH82, and the membrane  
14 bound, T7SS core component EsaA. Indeed, EsaA, which has a prominent  
15 extracellular loop [34], was ~50% less abundant in  $\Delta$ esxC, implying that EsxC absence  
16 may affect the T7SS assembly or display.

17 Consistent identification of cytosolic proteins during *S. aureus* surfome analyses may  
18 be due to non-canonical secretion of cytosolic proteins that can bind to bacterial  
19 surfaces [35, 36] or cell lysis during sample preparation [34, 37, 38]. However, the  
20 reduction in cytosolic proteins and the increased levels of SsaA that we observed in  
21  $\Delta$ esxC were similar to what was previously described for a mutant deficient in the  
22 major autolysin Atl [36]. Therefore, we compared autolysin-dependent Triton X-100  
23 lysis of WT,  $\Delta$ esxC and,  $\Delta$ essC, a mutant lacking the major ATPase EssC required for  
24 T7SS export, in PBS (non-growing conditions). While  $\Delta$ esxC was slightly more  
25 resistant to Triton X-100 (less prone to autolysis),  $\Delta$ essC was clearly defective in



1 autolysis (Fig. 2C and D), as compared to the WT. Together, our data strongly suggest  
2 that the presence of EsxC in the cell envelope contributes to shaping the bacterial  
3 surface.

4

#### 5 ***S. aureus* esxC and essC mutants are more sensitive to linoleic acid.**

6 *S. aureus* has been consistently shown to substantially augment the levels of T7SS  
7 expression, when grown in presence of host fatty acids [30-32]. Given our findings that  
8 the *esxC* mutant has a defective cell membrane and that *esxC* deletion affects the  
9 surface abundance of *IsdA*, which is essential for *S. aureus* resistance to antimicrobial  
10 fatty acids [39], we grew WT USA300 JE2 and its isogenic *essC* or *esxC* mutant in the  
11 presence of an unsaturated fatty acid (C18:2), linoleic acid (LA), at a concentration (80  
12  $\mu$ M) that still allows WT growth. Bacteria were also grown in parallel in presence of  
13 stearic acid (SA), a saturated C18:0 fatty acid. The T7SS mutants displayed impaired  
14 growth in presence of LA but not SA, as measured by optical density (Fig. 3A) or  
15 colony forming units (Fig. 3B). Importantly,  $\Delta$ *esxC* complemented with a plasmid  
16 containing the *esxC* gene reverted to the WT phenotype (Fig. 3C).

17

#### 18 **T7SS substrates contribute to *S. aureus* resistance to LA toxicity.**

19 Next, we investigated whether T7SS proteins other than *essC* and *esxC* contributed  
20 to *S. aureus* growth in presence of LA. Mutants lacking two other substrates,  $\Delta$ *esxA*  
21 and  $\Delta$ *esxB*, were grown in presence of fatty acids. Again, mutations affecting these  
22 T7SS components caused bacteria to replicate slower than the WT USA300 (Fig. 4A).  
23 To ensure that the increased sensitivity observed for the T7SS mutants was not strain  
24 specific, RN6390  $\Delta$ *essC* or  $\Delta$ *esxC* and Newman  $\Delta$ *esxA* or  $\Delta$ *esxB* mutants were tested.

1 Similar to USA300 mutants, the growth of these T7SS mutants was also impacted in  
2 the presence of LA (Fig. 4B and 4D). The growth defect in Newman  $\Delta$ esxA was  
3 abrogated upon complementation (Fig. 4C). Of note, Newman WT was readily  
4 inhibited by only 40  $\mu$ M LA. This is in agreement with the lower expression levels of  
5 the T7SS in this strain compared to USA300 [13, 14]. We conclude that a functional  
6 T7SS plays a role in *S. aureus* resistance to LA toxicity.

7

8 **T7SS does not affect bacterial affinity to LA, but is required for maintaining**  
9 **membrane integrity upon LA binding.**

10 As our membrane studies and surfome analyses strongly suggested that the bacterial  
11 envelope is altered upon T7SS defect, we hypothesised that LA-mediated growth  
12 inhibition of T7SS mutants was due to an increased binding to LA. To test this  
13 hypothesis, we chemically engineered LA to produce an azide functionalised LA ( $N^6$ -  
14 diazo- $N^2$ -((9Z,12Z)-octadeca-9,12-dienoyl)lysine,  $N_3$ -LA) or azide-LA (Fig. 5A). After  
15 incubating bacteria with azide-LA, click-chemistry with an alkyne dye (Click-iT™ Alexa  
16 Fluor™ 488 sDIBO alkyne) was used to stain azide-LA associated with bacteria. There  
17 were no obvious differences in the fluorescence from *essC* and *esxC* mutants  
18 compared to the WT (USA300 JE2) (Fig. 5B), suggesting that T7SS components are  
19 not involved in binding or sequestering LA. However, when bacteria treated with azide-  
20 LA were stained with propidium iodide (PI), a good indicator of membrane integrity,  
21  $\Delta$ essC and  $\Delta$ esxC displayed a more intense PI staining in comparison the WT (Fig.  
22 5C and D). This suggests that an intact T7SS helps *S. aureus* to maintain its  
23 membrane integrity when faced with the detergent-like effects of unsaturated fatty  
24 acids.

1

2 **Incorporation of LA into membrane phospholipids is compromised in the**  
3 **absence of T7SS.**

4 Our findings that T7SS mutants have a compromised membrane, which responds  
5 differently to LA, led us to investigate the contribution of membrane lipids to these  
6 phenotypes. Lipids from WT (USA300 JE2) and T7SS mutants were analysed by high-  
7 performance liquid chromatography (HPLC)-mass spectrometry (MS) in negative  
8 ionisation mode. In keeping with previous reports [40, 41], phosphatidylglycerol (PG)  
9 was the major phospholipid present in the membrane of WT grown in TSB (Fig. S2A).  
10  $\Delta$ essC and  $\Delta$ esxC grown with or without 10  $\mu$ M LA [(a concentration that has been  
11 previously shown to be sub-inhibitory for USA300 [31]) displayed lipid profiles similar  
12 to that of WT (Fig. S2A and B). Notably, PG molecular species were significantly  
13 altered upon growth in LA-supplemented TSB for WT (Fig. 6A),  $\Delta$ essC (Fig. S3) and  
14  $\Delta$ esxC (Fig. 6B). Three new LA-specific PG species with mass to charge ratios (m/z)  
15 731 (C33:2), 759 (C35:2), and 787 (C37:2) appeared to contain LA (C18:2) or its  
16 elongated C20:2 or C22:2 versions, as revealed by their fragmentations (Fig. S4).  
17 These PG species containing exogenous, unsaturated FAs were also present in  
18  $\Delta$ essC and  $\Delta$ esxC. However, LA (C18:2)-containing PG species (C33:2) was less  
19 abundant in the esxC mutant compared to WT (Fig. 6C). A similar trend, although  
20 statistically non-significant ( $P > 0.05$ ), was observed for C20:2- and C22:2-containing  
21 PG species (Fig. S5), and when all the unsaturated exogenous PG species were  
22 combined (Fig. 6D). We conclude that a T7SS defect may compromise the  
23 incorporation and elongation of LA in *S. aureus* membranes.

24

1 **T7SS mutations affect the total cellular content and the response of *S. aureus***  
2 **to LA.**

3 In order to gain further insight into mechanisms underlying T7SS action in presence  
4 of LA, we used an unbiased proteomic approach to study protein profiles of WT strain  
5 (USA300 JE2) and isogenic *essC* or *esxC* mutants grown exponentially with or without  
6 10  $\mu$ M LA. Interestingly,  $\Delta$ *essC* or  $\Delta$ *esxC* cultured in TSB readily displayed proteins  
7 with changed abundance when compared to the WT, with 37 and 24 proteins  
8 significantly ( $P < 0.05$ ) altered in  $\Delta$ *essC* and  $\Delta$ *esxC*, respectively. Similarly, 14 proteins  
9 were differentially abundant in both *essC* and *esxC* mutants (Fig. 7A and B). These  
10 included proteins involved in signal transduction (LytR and ArlR), cell wall composition  
11 (acetyltransferase GNAT, FnbB and MazF), DNA repair (MutL and RadA), nucleotide  
12 binding (ATP-grasp domain protein and YqeH), hydrolysis (amidohydrolase), cell  
13 stress response (universal stress protein (Usp) family), or uncharacterised  
14 (A0A0H2XGJ8, YbbR and lipoprotein) (Fig. 7B and Table 2). Of the 33 proteins that  
15 were only changed in  $\Delta$ *essC* (23) or  $\Delta$ *esxC* (10), nearly 40% (13) associated with  
16 oxidation-reduction and other metabolic processes. Ten membrane proteins were  
17 more abundant in the absence of *EssC* (Table 2), which included SrrB, a membrane  
18 protein, whose gene expression was shown to be increased 6 times upon growth of  
19 USA300 in presence of LA [31]. SrrB was also detected at higher levels in the *esxC*  
20 mutant although the increase was non-significant ( $P = 0.07$ ).

21 Next, we compared the proteomic profiles of LA-treated strains (WT,  $\Delta$ *essC* or  $\Delta$ *esxC*)  
22 with their untreated counterparts. Clearly, the principal component analysis revealed  
23 that the differences due to the genetic makeup (WT or T7SS mutants) were less  
24 prominent than the dramatic changes induced by LA (Fig. S6). These changes are  
25 exemplified for the WT; out of 1132 proteins identified, 163 proteins with an altered

1 relative abundance upon growth with LA (Fig. 7C). 167 and 171 proteins were changed  
2 ( $P < 0.05$ ) in  $\Delta$ essC and  $\Delta$ esxC, respectively, in response to LA, of which ~ 40% (68)  
3 were common to these mutants and their WT (Fig. 7D). At least 30% of the significantly  
4 changed proteins ( $P < 0.05$ ) were unique to WT (53),  $\Delta$ essC (50), or  $\Delta$ esxC (64) (Fig.  
5 7D), suggesting that each strain responds differently to LA. However, all but one  
6 protein (13/14) that were similarly deregulated in *essC* and *esxC* mutants grown  
7 without LA (Fig. 7B) are modulated in presence of LA (highlighted in bold in Table S1).  
8 Proteins that were less abundant in both mutants were, upon LA treatment, either  
9 increased to WT levels (MutL, acetyltransferase GNAT, Toxin MazF, and ATP-grasp  
10 domain protein), or were unchanged in the mutants and decreased in the LA-treated  
11 WT (LytR and FnbB) [Table S1]. Likewise, proteins with increased amounts upon *essC*  
12 or *esxC* deletion were: (i) downregulated to WT levels in response to LA (putative  
13 lipoprotein A0A0H2XGW7), (ii) unaltered in both mutants and upregulated in WT (Usp,  
14 amidohydrolase, and YbbR), (iii) or further increased in the *essC* mutant and strongly  
15 upregulated in WT (A0A0H2XGJ8) [Table S1]. In sum, except for ArlR and RadA that  
16 were conversely regulated in WT and the T7SS mutants after LA treatment, proteins  
17 similarly deregulated upon *esxC* or *essC* deletion were returned to similar levels in  
18 response to LA. A similar trend was observed for 15 out of 23 and all the 10 proteins  
19 exclusively more or less abundant in  $\Delta$ essC and  $\Delta$ esxC, respectively.

20 We then used QuickGO (a web-based tool for Gene Ontology searching) [42] to  
21 retrieve GO terms associated with the ten most significantly upregulated proteins in  
22 WT upon LA treatment (Table S1). Strikingly, 9/10 of these proteins had a hydrolase  
23 or an oxidoreductase activity. A comprehensive, statistical analysis to determine if  
24 specific molecular functions were significantly enriched in response to LA showed a  
25 clear enrichment of 8 molecular functions ( $P < 0.05$ ) in at least one strain (WT or T7SS

1 mutants) (Fig. 7E). Oxidoreductase and hydrolase activities were enhanced in LA-  
2 treated WT, while  $\Delta$ essC and  $\Delta$ esxC were less able to upregulate proteins with these  
3 molecular functions. Flavin adenine dinucleotide (FAD)-binding, which is also involved  
4 in oxidation-reduction and fatty acid metabolic processes, was similarly more enriched  
5 in LA-WT. In contrast, transferase activity, which is linked to cell wall synthesis, was  
6 induced more in T7SS mutants compared to the WT.

7 We also determined the molecular functions that are decreased upon LA challenge  
8 (Fig. 7F). In agreement with reduced intracellular ATP levels following membrane  
9 damage by antimicrobial fatty acids [43], USA 300 JE2 WT strongly inhibited genes  
10 with the ATP binding function (mainly ATP-binding ABC transporters). The ATP-  
11 dependent lyase activity was also repressed by the WT. T7SS mutants, on the  
12 contrary, were less able to modulate ATP-binding proteins and instead relied on a  
13 strong inhibition of ribosomal constituents as well as other components of translation  
14 in general (Fig. 7E). Taken together, our proteomic analyses reveal that the lack of  
15 T7SS induces altered membrane and metabolic states, reminiscent of oxidative stress  
16 responses. While the WT shows a multifaceted response to mitigate the damages  
17 caused by LA on the bacterial membrane, these responses are clearly altered when  
18 T7SS is compromised.

19

## 20 **Discussion**

21 Host fatty acids (FAs) play a crucial role in the host defence to *S. aureus* infections. *S.*  
22 *aureus* is particularly sensitive to unsaturated FAs, which are abundant in the human  
23 skin [39, 44]. We report here that the T7SS, an important component of *S. aureus*  
24 virulence arsenal, is critical in modulating the response to antimicrobial host FAs by

1 maintaining the bacterial cell membrane integrity. Specifically, we demonstrate that a  
2 T7SS substrate, EsxC, impacts *S. aureus* membrane properties, presumably by  
3 altering T7SS assembly. A functional T7SS enables bacteria to mitigate LA-induced  
4 toxicity and grow better than mutants with a compromised T7SS. In the absence of  
5 T7SS components, LA enhances cell membrane damage, and cellular proteomics  
6 suggest that bacteria are readily stressed and unable to activate adaptive mechanisms  
7 involved in the resistance to LA.

8 Although several recent studies have revealed multiple interactions between the  
9 staphylococcal T7SS components, the precise molecular architecture of this system  
10 remains largely unknown. Burts and co-authors first described the 15-kDa EsxC  
11 (previously EsaC), as a secreted protein, whose secretion was abrogated upon  
12 deletion of *essC*, the central T7SS transporter in *S. aureus* [18]. Further evidence of  
13 EsxC being a T7SS substrate is the impaired production and/or secretion of the  
14 cognate T7SS substrates EsxA and EsxB in absence of EsxC [13]. Indeed, for EsxA-  
15 D, EsaD (EssD) and EsaE (EssE), the deletion of one of these T7SS effectors affects  
16 the stability and/or the successful export of others T7SS substrates, although such  
17 effects appear to be strain-dependent [8, 10, 13-15, 18, 19, 23]. EsaE was reported to  
18 partially localize in *S. aureus* membranes and interact with membrane-bound EssC,  
19 EsxC, EsaD and EsaG [8, 23]. In *esaE* defective mutants, less EsxB and EsxD were  
20 detected in whole cell lysates, while EsxA, EsxB, EsxC and EsxD were drastically  
21 reduced in bacterial supernatants [23]. As reported previously, we also found that  
22 EsxC can localize within staphylococcal membranes [9, 14]. Thus, based on available  
23 data, EsxC is likely to be associated to EsxA, EsaD, or EsaE on the membrane [13,  
24 23]. However, the reduced EsaA protein levels that we found on the surface of *S.*  
25 *aureus* USA300 JE2  $\Delta$ *esxC* combined with prior observations of diminished EsxC

1 protein levels in the membrane of a RN6390 *esaA* mutant [14] suggest that EsxC may  
2 interact with EsaA in *S. aureus* membranes. Since EsaA can strongly bind to EssB,  
3 and EsaA-EssB complexes assemble to polymeric structures comprising EssA, EssC,  
4 EsaD and EsxA [45], it is enticing to speculate that EsxC is part of the T7SS  
5 machinery, and not just a secreted substrate. This is in agreement with a previous  
6 report that EsxA secretion in USA300 is abrogated upon *esxC* deletion [13].

7 Recently, the functional membrane microdomain (FMM) protein flotillin was shown to  
8 play a key role in assembly of the staphylococcal T7SS. Mielich-Suss and co-workers  
9 reported that T7SS integral membrane proteins like EssB are not evenly distributed in  
10 *S. aureus* membranes, but interact with the flotillin homolog FloA within FMMs [16].  
11 Well-structured FMMs might play a role in membrane fluidity of *S. aureus* as they do  
12 for *Bacillus subtilis* [46]. Interestingly, *S. aureus* T7SS transcripts were reported to be  
13 more abundant, when there was a reduction of membrane fluidity [31]. Furthermore,  
14 in a *S. aureus* mutant lacking *fakA*, which displays increased membrane rigidity [31],  
15 T7SS genes are upregulated in comparison to the isogenic WT strain [47]. Detergents,  
16 which affect staphylococcal membrane, also stimulate the T7SS [30]. Hence, there  
17 appears to be a link between membrane fluidity and T7SS in *S. aureus*, and it was  
18 suggested that the membrane state triggers the production of T7SS [31]. Remarkably,  
19 we find that *esxC* deletion led to a reproducible mild increase in bacterial membrane  
20 rigidity and membrane defects (Figs. 1 and 2), suggesting membrane modulation by  
21 the T7SS. It is plausible that interactions between FloA and T7SS are perturbed  
22 enough upon *esxC* deletion to affect *S. aureus* FMMs. We surmise that a functional  
23 T7SS helps *S. aureus* to maintain its membrane architecture.

24 The current cellular proteomics data reveal that, in comparison to *S. aureus* USA300  
25 JE2 WT, the deletion of *essC* alters the abundance of higher number of proteins (37)



1 than that of *esxC* (24). This is in keeping with the greater importance of *EssC* as the  
2 conserved driving force of the T7SS [7]. Importantly, almost 60% of proteins  
3 deregulated in  $\Delta$ *esxC* are similarly affected in  $\Delta$ *essC*, strongly suggesting that any  
4 modification of the T7SS core leads to a similar staphylococcal response. Likewise, in  
5 the strain RN6390, most genes that were dysregulated in  $\Delta$ *essC* were similarly altered  
6 in the *esaB* mutant [48]. However, surprisingly, proteins with altered abundance in  
7 USA300  $\Delta$ *essC* do not correspond to differentially expressed genes in RN6390  $\Delta$ *essC*  
8 [49]. This apparent discrepancy might be due to differences in strains. Nevertheless,  
9 the upregulation in RN6390  $\Delta$ *essC* of genes under the control of the ferric uptake  
10 regulatory protein *Fur*, which was shown not to be due to iron-starvation [49], might  
11 indicate an altered oxidative status following *essC* deletion given the known role of *Fur*  
12 in oxidative stress resistance [50, 51]. Our proteomics data reveal that many proteins  
13 with oxidoreductase activity were more abundant in USA300 JE2  $\Delta$ *essC*. *S. aureus*  
14 RN6390 was also shown to differentially express redox-sensitive genes in absence of  
15 *EsaB* [48]. Since the T7SS substrate *EsxA* is upregulated in response to hydrogen  
16 peroxide [49], one could speculate that lack of T7SS stimulate an oxidative stress  
17 response that might be an indirect effect of the membrane destabilization.

18 A further indication of altered physiological states of  $\Delta$ *essC* and  $\Delta$ *esxC* was the  
19 changed abundance of proteins belonging to the two-component regulatory systems  
20 *LytSR*, *ArlSR* and *SrrAB* (*LytR*, *ArlR*, and *SrrB*, respectively). *LytR* and *ArlR* protein  
21 levels were decreased in both *essC* and *esxC* mutants, consistent with a previous  
22 report of the down-regulation of *lytR* transcription in absence of *arlR* [52]. *LytRS* can:  
23 (i) modulate the bacterial surface [53], (ii) monitor membrane potential changes [54],  
24 and (iii) affect biofilm formation [55], whereas *SrrAB* can sense and respond to  
25 impaired electron flow in the electron transport chain [56]. Importantly, the *S. aureus*

1 response to antimicrobial FAs includes downregulation of *lytRS* [32, 57], and  
2 upregulation of *srrB* [31]. As LytR and SrrB levels were altered in  $\Delta$ *essC* or  $\Delta$ *esxC* in  
3 comparison to WT, impairments of the T7SS are likely to result in a changed cell  
4 envelope, which impacts how bacteria respond to the LA challenge.

5 Antimicrobial free FAs such as LA are known to target bacterial membranes [58]. LA  
6 and other unsaturated FAs that are not produced by *S. aureus* can, however, be used  
7 by this bacterium for its phospholipid synthesis via a two-component fatty acid kinase  
8 (Fak) [44, 47, 59]. Exogenous FAs are bound by FakB1 if saturated or FakB2 if  
9 unsaturated [47]. FakB-bound FAs are phosphorylated by FakA to generate acyl-PO<sub>4</sub>,  
10 which can be incorporated into membrane phospholipids [47]. Nonetheless, *S. aureus*  
11 growth is inhibited by LA *in vitro* [32, 60, 61]; strikingly, the T7SS is strongly  
12 upregulated when *S. aureus* is grown in presence of sub-inhibitory concentrations of  
13 LA [31, 32]. Furthermore, Lopez and co-workers, by carefully examining the structure-  
14 activity relationships of a panel of long-chain fatty acids, discovered that fatty acids  
15 with more cis double bonds, which are more toxic toward *S. aureus* [44], are also more  
16 potent T7SS activators [31]. Our current study demonstrates that *S. aureus* mutants  
17 with a defective T7SS grow slower in the presence of LA, which strongly suggests a  
18 protective role of T7SS against LA toxicity. But how does the T7SS mediate this  
19 protective effect? The previously identified resistance mechanisms to antimicrobial  
20 fatty acids (AFA) in *S. aureus* include: (i) modulation of cellular hydrophobicity by the  
21 surface protein IsdA or wall teichoic acids [39, 44, 62, 63], and (ii) AFA detoxification  
22 with the efflux pumps Tet38 and FarE [64, 65]. Surprisingly, our proteomic analyses  
23 revealed that IsdA was less abundant in the LA-treated WT, and no significant  
24 changes were seen in the mutants. As other proteins affecting cell wall organisation  
25 (IsdH, sortase A, Pbp3, and TarK) were also inhibited in response to LA, this might be

1 due to a major restructuring of the cell wall when *S. aureus* is grown in presence of  
2 LA. Thus, previously described resistance mechanisms do not appear to explain why  
3 T7SS mutants are more susceptible to LA.

4 Our data suggest that the preservation of staphylococcal membrane architecture is  
5 also crucial in the response to LA. A role for the T7SS in cell membrane homeostasis  
6 is further supported by the activation of staphylococcal T7SS by membrane-modifying  
7 factors such as detergents and temperature (30, 31). Indeed, T7SS mutants, which  
8 appeared to bind LA similarly, displayed an increased membrane permeability upon  
9 LA binding and were less able to incorporate LA into their phospholipids. However, the  
10 observation that this LA incorporation was impacted more in  $\Delta$ esxC than in  $\Delta$ essC  
11 seems counterintuitive given the central role of EssC in T7 secretion [10-12]. This  
12 might indicate that secretion per se is not required for LA incorporation; EsxC  
13 accumulated in the membrane (Fig. 2A) could mediate LA incorporation in the essC  
14 mutant. It is also worth noting that transcript levels of esxC, and not essC, were  
15 strongly upregulated in a *S. aureus fakA* mutant [47]. Levels of FakA, FakB1 and  
16 FakB2 showed no changes in the T7SS mutants in presence or absence of LA,  
17 suggesting no regulatory control of the Fak pathway by the T7SS. Hence, we  
18 speculate that EsxC and other interdependent T7SS substrates play an important role  
19 in facilitating Fak function in *S. aureus* membranes, either by mediating recruitment or  
20 correct targeting of Fak proteins to the membrane. Our findings warrant further  
21 investigations into molecular mechanisms underlying T7SS-mediated FA  
22 incorporation within staphylococcal membranes.

23 The growth of *S. aureus* USA300 JE2 WT in presence of LA increases the levels of  
24 the T7SS proteins EsxA and EsaA, the oleate hydratase McrA, and the staphylococcal  
25 respiratory response protein SrrB, in keeping with prior gene expression analyses [31,

1 32]. Furthermore, WT membranes showed major remodelling upon LA-treatment.  
2 Specifically, increased levels of cytochrome D ubiquinol oxidase subunit I and SrrB  
3 point to a perturbation of respiration. Another AFA, sapienic acid, has been previously  
4 reported to inhibit respiration [43]. On the whole, *essC* and *esxC* mutants seem to  
5 display similar metabolic and structural responses to LA compared to the WT.  
6 However, both T7SS mutants were less able to further prime their redox-active  
7 proteins. Instead, to cope with LA, they appear to rely on strong inhibition of the protein  
8 synthesis machinery, which is reminiscent of the stringent response [66].

9 Taken together, we conclude that T7SS plays a key role in modulating the *S. aureus*  
10 cell membrane in response to toxic host fatty acids. We propose that the increased  
11 susceptibility of T7SS mutants to LA might explain why they are less virulent in LA-  
12 and other AFA-rich environments like the mouse lungs ( $\Delta$ *essC*) [30], abscesses  
13 ( $\Delta$ *esxC* and  $\Delta$ *esaB*), liver and skin ( $\Delta$ *essB*) [20, 31]. Previous research has shown that  
14 T7SS induction by host-derived fatty acids is a fine-tuned activation of environment-  
15 specific bacterial virulence factors [30, 31]. Although, at present, it is still unclear how  
16 T7SS contributes to staphylococcal membrane architecture, T7SS interaction with the  
17 flotillin homolog FloA within functional membrane microdomains [16] supports the idea  
18 that T7SS proteins interact with many other proteins to modulate *S. aureus*  
19 membranes. Indeed, our data also suggest that blocking T7SS activity would make *S.*  
20 *aureus* more vulnerable to antimicrobial fatty acids, a key anti-staphylococcal host  
21 defence, thus making T7SS a very attractive drug target.

22

## 1 **Materials and methods**

2 **Bacterial strains and growth conditions.** The *S. aureus* strains used in this study  
3 are listed in the Table 3, and grown aerobically in tryptic soy broth (TSB) overnight  
4 (O/N) at 37°C for each experiment unless stated otherwise. For complemented *S.*  
5 *aureus* strains, TSB was supplemented with 10 µg/mL chloramphenicol.

6 **Construction of bacterial mutants.** The primers used are listed in the Table 4. In-  
7 frame deletion of *essC* or *esxC* was performed as described previously [33]. Briefly,  
8 1-kb DNA fragments up and downstream of the targeted gene sequence were PCR-  
9 amplified from USA300 LAC JE2 chromosomal DNA, and both PCR products fused  
10 via SOEing (splicing by overlap extension)-PCR. The 2-kb DNA fragment obtained  
11 was cloned into pKORI, and used for in-frame deletion. Putative mutants were  
12 screened by PCR-amplification of a fragment including the gene of interest, whose  
13 deletion was confirmed by Sanger sequencing. Further, to confirm that successful  
14 mutants did not have any additional mutations, Illumina whole genome sequencing  
15 was performed on libraries prepared with the Nextera XT kit and an Illumina MiSeq®  
16 instrument following manufacturers' recommendations. For complementation, full-  
17 length *esxC* gene was cloned onto pOS1CK described previously [21].

18 **Membrane fluidity assay.** O/N bacterial cultures were diluted to an OD<sub>600</sub> of 0.15 in  
19 TSB, and were grown to an OD<sub>600</sub> of 1 (OD1). Bacteria were washed with PBS prior  
20 to treatment for 30 min at 37°C with 37.5 µg/mL lysostaphin in PBS containing 20%  
21 sucrose. The spheroblasts were then centrifuged at 8000 × *g* for 10 min, and the pellet  
22 resuspended in the labelling solution (PBS, 20% sucrose, 0.01% F-127, 5 µM pyrene  
23 decanoic acid). The incubation in the dark was done for 1h at 25°C under gentle  
24 rotation. PBS supplemented with 20% sucrose was used to wash the stained

1 spheroblasts that were afterwards transferred to 96-well plates for fluorescence  
2 measurements as previously described [31].

3 **Autolysis assays.** Whole cell autolysis assays were performed as described  
4 elsewhere with a few modifications [67]. Specifically, OD1-grown *S. aureus* USA300  
5 JE2 WT, *essC* and *esxC* mutants were extensively washed with PBS followed by ice-  
6 cold water, and resuspended in PBS with 0.1% Triton X-100 to an OD<sub>600</sub> of 0.7.  
7 Subsequently, the samples were incubated with shaking at 37°C for 2h, after which  
8 bacteria were diluted with PBS and plated for CFU determination.

9 **Growth curves.** O/N bacterial cultures were diluted to an OD<sub>600</sub> of 0.05 in plain TSB  
10 or TSB supplemented with fatty acids. Bacteria were then grown in a 96-well plate with  
11 shaking, and the OD<sub>600</sub> was measured every 15 minutes with a FLUOstar OMEGA  
12 plate reader (BMG Labtech, UK).

13 **Cell shaving for surfome analysis.** *S. aureus* USA300 JE2 WT grown to OD1 and  
14  $\Delta$ *esxC* were washed three times before being treated with Proteomics grade trypsin  
15 from porcine pancreas (Sigma-Aldrich, UK) for 15 min as described [37]. The samples  
16 were then centrifuged at 1000 × *g* for 15 min, and the bacterial pellets discarded while  
17 supernatants were filtered through a 0.2 μM filter. The freshly prepared peptides were  
18 frozen (-20°C) until 2 additional, independent biological replicates per strain were  
19 prepared.

20 **Cellular proteomics.** *S. aureus* strains were grown O/N at 37°C on tryptic soy agar  
21 plates. The next day, single colonies were used to inoculate 10 mL plain TSB or TSB  
22 with 10 μM LA. Cultures were grown at 37°C with 180-rpm shaking until an OD<sub>600</sub> of  
23 3.2 ± 0.2 was reached. The bacteria were then centrifuged, washed with PBS, and  
24 resuspended in lysis buffer (PBS, 250 mM sucrose, 1 mM EDTA, and 50 μg/mL

1 lysostaphin) supplemented with cOmplete™, mini, EDTA-free protease inhibitor  
2 cocktail (Sigma-Aldrich, UK). After 15 min incubation at 37°C, cells were lysed  
3 mechanically with silica spheres (Lysing Matrix B, Fischer Scientific, UK) in a fast-prep  
4 shaker as described previously [16]. Samples were then centrifuged, and the  
5 supernatants transferred to fresh tubes, where proteins were reduced and alkylated  
6 for 20 min at 70°C with 10 mM TCEP (tris(2-carboxyethyl)phosphine) and 40 mM CAA  
7 (2-chloroacetamide), respectively. Next, the solvent was exchanged first to 8M urea  
8 buffer then to 50 mM ammonium bicarbonate. Proteins were digested O/N at 37°C  
9 with mass spectrometry grade lysyl endopeptidase LysC and sequencing grade  
10 modified trypsin (Promega LTD, UK).

11 **Label-free protein quantification.** Peptides prepared for surfome or whole-cell  
12 proteome analyses were desalted and concentrated with a C18 cartridge in 40 µL MS  
13 buffer (2% acetonitrile plus 0.1% trifluoroacetic acid). For each sample, 20 µL were  
14 analysed by nanoLC-ESI-MS/MS using the Ultimate 3000/Orbitrap Fusion  
15 instrumentation (Thermo Scientific), and a 90 minute LC separation on a 50 cm  
16 column. The data were used to interrogate the Uniprot *Staphylococcus aureus*  
17 USA300 database UP000001939, and the common contaminant database from  
18 MaxQuant [68]. MaxQuant software was used for protein identification and  
19 quantification using default settings. Intensities were log<sub>2</sub>-transformed with the Perseus  
20 software, and proteins with one or no valid value for every sample in triplicate were  
21 filtered. For surfome data, the removeBatchEffect function of the limma R package  
22 [69] was used to remove differences accounting for variation in shaving efficiency done  
23 on three different days for all the biological replicates. Missing values in cellular  
24 proteomics data were imputed on R. Specifically, for each sample, the imputed value

1 was either the lowest intensity across all samples if at least two biological replicates  
2 had missing values or the average of two valid values if only one was missing.

3 **Synthesis of azide functionalized linoleic acid.** A 2-step synthesis was used to  
4 obtain  $N^6$ -diazo- $N^2$ -((9Z,12Z)-octadeca-9,12-dienoyl)lysine,  $N_3$ -LA (azide-LA). LA was  
5 first functionalized with *N*-hydroxysuccinimide (NHS) in anhydrous dimethyl  
6 formamide (DMF) in presence of *N*-(3-dimethylaminopropyl)-*N'*-ethylcarbodiimide  
7 hydrochloride. The solvent was then removed and replaced by dichloromethane  
8 (DCM), following which the reaction mixture was washed with water and dried over  
9 magnesium sulphate. The product, 2,5-dioxopyrrolidin-1-yl (9Z,12Z)-octadeca-9,12-  
10 dienoate (NHS-LA), was analysed using  $^1\text{H}$  nuclear magnetic resonance (NMR)  
11 spectroscopy (Fig. S7A) and mass spectrometry (MS). MS:  $[\text{M}+\text{Na}]^+$  400.5  
12 (calculated), 400.5 (found).

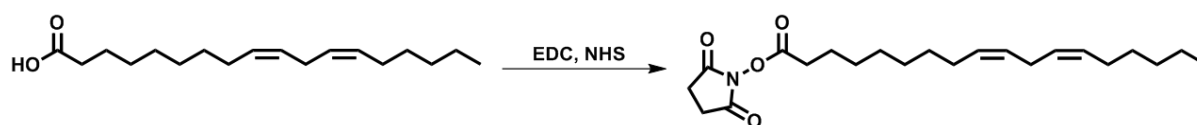

14 NHS-LA was left O/N at room temperature to react with L-azidolysine hydrochloride in  
15 anhydrous DMF, and produce azide-LA.

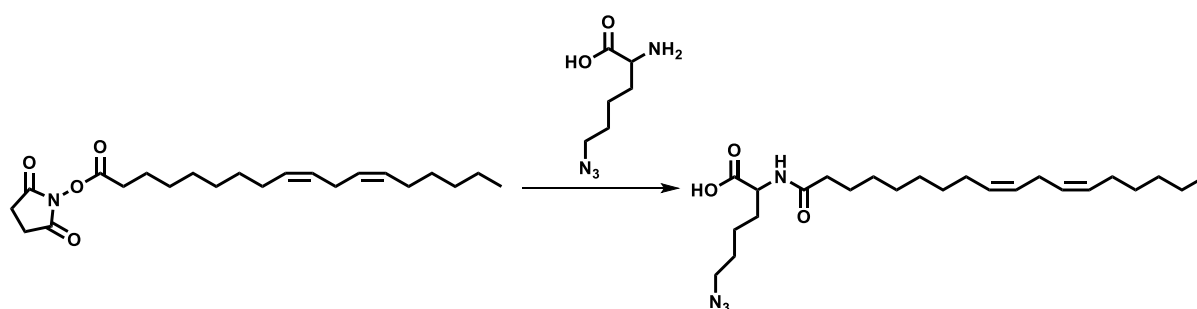

17 DMF was then removed, the reaction mixture precipitated in water, and dried under  
18 vacuum to obtain a clear oil. The composition of the oil was confirmed as being a  
19 mixture of azide-LA and unmodified LA (20% and 80%, respectively) based on  $^1\text{H}$



1 NMR (Fig. S7B) and MS data. MS: [LA-H]<sup>-</sup> 279.5 (calculated), 279.2 (found), [M-H]<sup>-</sup>  
2 433.3 (calculated), 433.6 (found).

3 **Binding assays with azide-LA and click chemistry.** *S. aureus* USA300 JE2 WT,  
4  $\Delta$ essC, and  $\Delta$ esxC, grown to OD1, were treated with 10  $\mu$ M azide-LA for 15 min at  
5 37°C with shaking. The samples were then centrifuged, and the bacterial pellets  
6 resuspended in PBS supplemented with 4  $\mu$ g/mL Click-iT™ Alexa Fluor™ 488 sDIBO  
7 alkyne (Life Technologies LTD, UK). After incubation at 25°C for 1h with shaking,  
8 bacteria were washed with PBS, and binding to azide-LA was quantified by measuring  
9 fluorescence using a FLUOstar OMEGA plate reader (BMG Labtech, UK). The  
10 samples imaged with a microscope were additionally stained with 3  $\mu$ M propidium  
11 iodide, following click chemistry.

12 **Widefield microscopy.** Bacteria stained with FM4-64 or Click-iT™ Alexa Fluor™ 488  
13 sDIBO alkyne were immobilized on thin layers of agarose covering glass slides.  
14 Samples were then mounted using ProLong Gold Antifade Reagent with DAPI (New  
15 England Biolabs LTD, UK), and viewed with a Leica DMI8 widefield microscope (Leica  
16 Microsystems LTD, UK). Acquired images were analysed with the ImageJ processing  
17 package Fiji [70].

18 **Lipid extraction and analyses.** Lipids were extracted from bacterial cultures as  
19 described elsewhere [71]. Briefly, bacteria were grown to OD1 in TSB or TSB  
20 supplemented with 10  $\mu$ M LA, centrifuged in a 2 mL glass Chromacol vial (Thermo  
21 Scientific), and resuspended in 0.5 mL MS grade methanol (Sigma-Aldrich). MS grade  
22 chloroform was then used to extract lipids. The extracted lipids were dried under  
23 nitrogen gas with a Techne sample concentrator (Staffordshire, UK), and the lipid  
24 pellets resuspended in 1 mL acetonitrile. The samples were then analysed by LC-MS

1 with a Dionex 3400RS HPLC coupled to an amaZon SL quadrupole ion trap mass  
2 spectrometer (Bruker Scientific) via an electrospray ionisation interface. Both positive  
3 and negative ionisation modes were used for sample analyses. The Bruker Compass  
4 software package was utilized for data analyses, using DataAnalysis for peak  
5 identification and characterization of lipid class, and QuantAnalysis for quantification  
6 of the relative abundance of distinct PG species to total PG species.

7 **Statistical analyses.** Except for the proteomics results, the statistical tests were  
8 performed with GraphPad Prism 8.0 as indicated in the figure legends, with *P* values  
9 < 0.05 considered significant. A paired two-tailed Student's t-test or a paired Mann-  
10 Whitney U test was used for pairwise comparisons. An ordinary one-way analysis of  
11 variance (ANOVA) with Dunnett's multiple comparisons test or a Kruskal-Wallis test  
12 with Dunn's multiple comparisons test was applied to data from three or more groups.  
13 The fold changes and *P* values of the proteomics data were calculated with the R  
14 package limma [69], with USA300 JE2 WT or bacteria grown without LA as references.  
15 These fold changes and *P* values were used by the R package piano [72] to compute  
16 the enrichment of gene ontology (GO) terms.

17

## 18 **Acknowledgments**

19 This study was supported by a Medical Research Council (MRC) grant  
20 (MR/N010140/1) to MU, an MRC Doctoral Training Partnership studentship in  
21 Interdisciplinary Biomedical Research (MR/J003964/1) awarded to RAJ, a CSIRO  
22 (Commonwealth Scientific and Industrial Research Organisation) scholarship to AK,  
23 and a Royal Society Wolfson Merit Award (WM130055) to SP. We thank Professor  
24 Tracy Palmer FRS (Institute for Cell and Molecular Biosciences, Newcastle University,  
25 UK) for the anti-EsxC serum, and the *S. aureus* strains RN6390 WT, RN6390  $\Delta$ essC

1 and RN6390  $\Delta$ esxC. We thank Professor Olaf Scheewind (Department of  
2 Microbiology, University of Chicago, Chicago, Illinois, USA) for providing us with the  
3 pOS1 and pKORI plasmids, and the *S. aureus* USA300 LAC and Newman strains. We  
4 thank GSK, Siena, Italy for providing the Newman *esxA*, *esxB* mutant strains used in  
5 this study. We acknowledge the contribution of the Proteomics Research Technology  
6 Platform, University of Warwick, UK.

## 1 References

- 2 1. von Eiff, C. et al. (2001) Nasal carriage as a source of *Staphylococcus aureus* bacteremia.  
3 Study Group. N Engl J Med 344 (1), 11-6.
- 4 2. Tong, S.Y. et al. (2015) *Staphylococcus aureus* infections: epidemiology, pathophysiology,  
5 clinical manifestations, and management. Clin Microbiol Rev 28 (3), 603-61.
- 6 3. Lee, A.S. et al. (2018) Methicillin-resistant *Staphylococcus aureus*. Nat Rev Dis Primers 4,  
7 18033.
- 8 4. Gordon, R.J. and Lowy, F.D. (2008) Pathogenesis of methicillin-resistant *Staphylococcus*  
9 *aureus* infection. Clin Infect Dis 46 Suppl 5, S350-9.
- 10 5. Conrad, W.H. et al. (2017) Mycobacterial ESX-1 secretion system mediates host cell lysis  
11 through bacterium contact-dependent gross membrane disruptions. Proc Natl Acad Sci U  
12 S A 114 (6), 1371-1376.
- 13 6. Unnikrishnan, M. et al. (2017) The Enigmatic Esx Proteins: Looking Beyond Mycobacteria.  
14 Trends Microbiol 25 (3), 192-204.
- 15 7. Warne, B. et al. (2016) The Ess/Type VII secretion system of *Staphylococcus aureus* shows  
16 unexpected genetic diversity. BMC Genomics 17, 222.
- 17 8. Cao, Z. et al. (2016) The type VII secretion system of *Staphylococcus aureus* secretes a  
18 nuclease toxin that targets competitor bacteria. Nat Microbiol 2, 16183.
- 19 9. Bobrovskyy, M. et al. (2018) EssH peptidoglycan hydrolase enables *Staphylococcus aureus*  
20 type VII secretion across the bacterial cell wall envelope. J Bacteriol.
- 21 10. Burts, M.L. et al. (2005) EsxA and EsxB are secreted by an ESAT-6-like system that is  
22 required for the pathogenesis of *Staphylococcus aureus* infections. Proc Natl Acad Sci U  
23 S A 102 (4), 1169-74.
- 24 11. Jager, F. et al. (2018) EssC is a specificity determinant for *Staphylococcus aureus* type  
25 VII secretion. Microbiology 164 (5), 816-820.
- 26 12. Zoltner, M. et al. (2016) EssC: domain structures inform on the elusive translocation  
27 channel in the Type VII secretion system. Biochem J 473 (13), 1941-52.
- 28 13. Anderson, M. et al. (2013) Secretion of atypical protein substrates by the ESAT-6 secretion  
29 system of *Staphylococcus aureus*. Mol Microbiol 90 (4), 734-43.
- 30 14. Kneuper, H. et al. (2014) Heterogeneity in ess transcriptional organization and variable  
31 contribution of the Ess/Type VII protein secretion system to virulence across closely related  
32 *Staphylococcus aureus* strains. Mol Microbiol 93 (5), 928-43.
- 33 15. Ohr, R.J. et al. (2017) EssD, a Nuclease Effector of the *Staphylococcus aureus* ESS  
34 Pathway. J Bacteriol 199 (1).
- 35 16. Mielich-Suss, B. et al. (2017) Flotillin scaffold activity contributes to type VII secretion  
36 system assembly in *Staphylococcus aureus*. PLoS Pathog 13 (11), e1006728.
- 37 17. Pallen, M.J. (2002) The ESAT-6/WXG100 superfamily -- and a new Gram-positive  
38 secretion system? Trends Microbiol 10 (5), 209-12.
- 39 18. Burts, M.L. et al. (2008) EsaC substrate for the ESAT-6 secretion pathway and its role in  
40 persistent infections of *Staphylococcus aureus*. Mol Microbiol 69 (3), 736-46.
- 41 19. Anderson, M. et al. (2011) EsaD, a secretion factor for the Ess pathway in *Staphylococcus*  
42 *aureus*. J Bacteriol 193 (7), 1583-9.
- 43 20. Wang, Y. et al. (2016) Role of the ESAT-6 secretion system in virulence of the emerging  
44 community-associated *Staphylococcus aureus* lineage ST398. Sci Rep 6, 25163.

- 1 21. Korea, C.G. et al. (2014) Staphylococcal Esx proteins modulate apoptosis and release of  
2 intracellular *Staphylococcus aureus* during infection in epithelial cells. *Infect Immun* 82 (10),  
3 4144-53.
- 4 22. Cruciani, M. et al. (2017) *Staphylococcus aureus* Esx Factors Control Human Dendritic  
5 Cell Functions Conditioning Th1/Th17 Response. *Front Cell Infect Microbiol* 7, 330.
- 6 23. Anderson, M. et al. (2017) EssE Promotes *Staphylococcus aureus* ESS-Dependent  
7 Protein Secretion To Modify Host Immune Responses during Infection. *J Bacteriol* 199 (1).
- 8 24. Dai, Y. et al. (2017) A Novel ESAT-6 Secretion System-Secreted Protein EsxX of  
9 Community-Associated *Staphylococcus aureus* Lineage ST398 Contributes to Immune  
10 Evasion and Virulence. *Front Microbiol* 8, 819.
- 11 25. Balasubramanian, D. et al. (2017) *Staphylococcus aureus* pathogenesis in diverse host  
12 environments. *Pathog Dis* 75 (1).
- 13 26. Schulthess, B. et al. (2012) Opposing roles of sigmaB and sigmaB-controlled SpoVG in  
14 the global regulation of *esxA* in *Staphylococcus aureus*. *BMC Microbiol* 12, 17.
- 15 27. Malachowa, N. et al. (2011) Global changes in *Staphylococcus aureus* gene expression  
16 in human blood. *PLoS One* 6 (4), e18617.
- 17 28. Voyich, J.M. et al. (2005) Insights into mechanisms used by *Staphylococcus aureus* to  
18 avoid destruction by human neutrophils. *J Immunol* 175 (6), 3907-19.
- 19 29. Palazzolo-Ballance, A.M. et al. (2008) Neutrophil microbicides induce a pathogen survival  
20 response in community-associated methicillin-resistant *Staphylococcus aureus*. *J Immunol*  
21 180 (1), 500-9.
- 22 30. Ishii, K. et al. (2014) Induction of virulence gene expression in *Staphylococcus aureus* by  
23 pulmonary surfactant. *Infect Immun* 82 (4), 1500-10.
- 24 31. Lopez, M.S. et al. (2017) Host-derived fatty acids activate type VII secretion in  
25 *Staphylococcus aureus*. *Proc Natl Acad Sci U S A* 114 (42), 11223-11228.
- 26 32. Kenny, J.G. et al. (2009) The *Staphylococcus aureus* response to unsaturated long chain  
27 free fatty acids: survival mechanisms and virulence implications. *PLoS One* 4 (2), e4344.
- 28 33. Bae, T. and Schneewind, O. (2006) Allelic replacement in *Staphylococcus aureus* with  
29 inducible counter-selection. *Plasmid* 55 (1), 58-63.
- 30 34. Dreisbach, A. et al. (2010) Profiling the surfacome of *Staphylococcus aureus*. *Proteomics*  
31 10 (17), 3082-96.
- 32 35. Hempel, K. et al. (2011) Quantitative proteomic view on secreted, cell surface-associated,  
33 and cytoplasmic proteins of the methicillin-resistant human pathogen *Staphylococcus*  
34 *aureus* under iron-limited conditions. *J Proteome Res* 10 (4), 1657-66.
- 35 36. Pasztor, L. et al. (2010) Staphylococcal major autolysin (Atl) is involved in excretion of  
36 cytoplasmic proteins. *J Biol Chem* 285 (47), 36794-803.
- 37 37. Solis, N. et al. (2014) *Staphylococcus aureus* surface proteins involved in adaptation to  
38 oxacillin identified using a novel cell shaving approach. *J Proteome Res* 13 (6), 2954-72.
- 39 38. Ventura, C.L. et al. (2010) Identification of a novel *Staphylococcus aureus* two-component  
40 leukotoxin using cell surface proteomics. *PLoS One* 5 (7), e11634.
- 41 39. Clarke, S.R. et al. (2007) The *Staphylococcus aureus* surface protein *IsdA* mediates  
42 resistance to innate defenses of human skin. *Cell Host Microbe* 1 (3), 199-212.
- 43 40. Delekta, P.C. et al. (2018) *Staphylococcus aureus* utilizes host-derived lipoprotein  
44 particles as sources of exogenous fatty acids. *J Bacteriol*.

- 1 41. Parsons, J.B. et al. (2011) Metabolic basis for the differential susceptibility of Gram-  
2 positive pathogens to fatty acid synthesis inhibitors. Proc Natl Acad Sci U S A 108 (37),  
3 15378-83.
- 4 42. Binns, D. et al. (2009) QuickGO: a web-based tool for Gene Ontology searching.  
5 Bioinformatics 25 (22), 3045-6.
- 6 43. Cartron, M.L. et al. (2014) Bactericidal activity of the human skin fatty acid cis-6-  
7 hexadecanoic acid on *Staphylococcus aureus*. Antimicrob Agents Chemother 58 (7), 3599-  
8 609.
- 9 44. Parsons, J.B. et al. (2012) Membrane disruption by antimicrobial fatty acids releases low-  
10 molecular-weight proteins from *Staphylococcus aureus*. J Bacteriol 194 (19), 5294-304.
- 11 45. Aly, K.A. et al. (2017) Isolation of a Membrane Protein Complex for Type VII Secretion in  
12 *Staphylococcus aureus*. J Bacteriol 199 (23).
- 13 46. Bach, J.N. and Bramkamp, M. (2013) Flotillins functionally organize the bacterial  
14 membrane. Mol Microbiol 88 (6), 1205-17.
- 15 47. Parsons, J.B. et al. (2014) Identification of a two-component fatty acid kinase responsible  
16 for host fatty acid incorporation by *Staphylococcus aureus*. Proc Natl Acad Sci U S A 111  
17 (29), 10532-7.
- 18 48. Casabona, M.G. et al. (2017) Functional analysis of the EsaB component of the  
19 *Staphylococcus aureus* Type VII secretion system. Microbiology.
- 20 49. Casabona, M.G. et al. (2017) Haem-iron plays a key role in the regulation of the Ess/type  
21 VII secretion system of *Staphylococcus aureus* RN6390. Microbiology 163 (12), 1839-  
22 1850.
- 23 50. Horsburgh, M.J. et al. (2001) In *Staphylococcus aureus*, fur is an interactive regulator with  
24 PerR, contributes to virulence, and is necessary for oxidative stress resistance through  
25 positive regulation of catalase and iron homeostasis. J Bacteriol 183 (2), 468-75.
- 26 51. Johnson, M. et al. (2011) Fur is required for the activation of virulence gene expression  
27 through the induction of the sae regulatory system in *Staphylococcus aureus*. Int J Med  
28 Microbiol 301 (1), 44-52.
- 29 52. Liang, X. et al. (2005) Global regulation of gene expression by ArlRS, a two-component  
30 signal transduction regulatory system of *Staphylococcus aureus*. J Bacteriol 187 (15),  
31 5486-92.
- 32 53. Groicher, K.H. et al. (2000) The *Staphylococcus aureus* IrgAB operon modulates murein  
33 hydrolase activity and penicillin tolerance. J Bacteriol 182 (7), 1794-801.
- 34 54. Patton, T.G. et al. (2006) The role of proton motive force in expression of the  
35 *Staphylococcus aureus* cid and Irg operons. Mol Microbiol 59 (5), 1395-404.
- 36 55. Sharma-Kuinkel, B.K. et al. (2009) The *Staphylococcus aureus* LytSR two-component  
37 regulatory system affects biofilm formation. J Bacteriol 191 (15), 4767-75.
- 38 56. Kinkel, T.L. et al. (2013) The *Staphylococcus aureus* SrrAB two-component system  
39 promotes resistance to nitrosative stress and hypoxia. MBio 4 (6), e00696-13.
- 40 57. Neumann, Y. et al. (2015) The effect of skin fatty acids on *Staphylococcus aureus*. Arch  
41 Microbiol 197 (2), 245-67.
- 42 58. Desbois, A.P. and Smith, V.J. (2010) Antibacterial free fatty acids: activities, mechanisms  
43 of action and biotechnological potential. Appl Microbiol Biotechnol 85 (6), 1629-42.
- 44 59. Nguyen, M.T. et al. (2016) Skin-Specific Unsaturated Fatty Acids Boost the  
45 *Staphylococcus aureus* Innate Immune Response. Infect Immun 84 (1), 205-15.

- 1 60. Arsic, B. et al. (2012) Induction of the staphylococcal proteolytic cascade by antimicrobial  
2 fatty acids in community acquired methicillin resistant *Staphylococcus aureus*. PLoS One  
3 7 (9), e45952.
- 4 61. Kelsey, J.A. et al. (2006) Fatty acids and monoacylglycerols inhibit growth of  
5 *Staphylococcus aureus*. Lipids 41 (10), 951-61.
- 6 62. Kohler, T. et al. (2009) Wall teichoic acid protects *Staphylococcus aureus* against  
7 antimicrobial fatty acids from human skin. J Bacteriol 191 (13), 4482-4.
- 8 63. Moran, J.C. et al. (2017) Comparative Transcriptomics Reveals Discrete Survival  
9 Responses of *S. aureus* and *S. epidermidis* to Sapientic Acid. Front Microbiol 8, 33.
- 10 64. Alnaseri, H. et al. (2015) Inducible Expression of a Resistance-Nodulation-Division-Type  
11 Efflux Pump in *Staphylococcus aureus* Provides Resistance to Linoleic and Arachidonic  
12 Acids. J Bacteriol 197 (11), 1893-905.
- 13 65. Truong-Bolduc, Q.C. et al. (2014) Native efflux pumps contribute resistance to  
14 antimicrobials of skin and the ability of *Staphylococcus aureus* to colonize skin. J Infect Dis  
15 209 (9), 1485-93.
- 16 66. Geiger, T. et al. (2012) The stringent response of *Staphylococcus aureus* and its impact  
17 on survival after phagocytosis through the induction of intracellular PSMs expression. PLoS  
18 Pathog 8 (11), e1003016.
- 19 67. Mashruwala, A.A. et al. (2017) Impaired respiration elicits SrrAB-dependent programmed  
20 cell lysis and biofilm formation in *Staphylococcus aureus*. Elife 6.
- 21 68. Cox, J. et al. (2014) Accurate proteome-wide label-free quantification by delayed  
22 normalization and maximal peptide ratio extraction, termed MaxLFQ. Mol Cell Proteomics  
23 13 (9), 2513-26.
- 24 69. Ritchie, M.E. et al. (2015) limma powers differential expression analyses for RNA-  
25 sequencing and microarray studies. Nucleic Acids Res 43 (7), e47.
- 26 70. Schindelin, J. et al. (2012) Fiji: an open-source platform for biological-image analysis. Nat  
27 Methods 9 (7), 676-82.
- 28 71. Smith, A.F. et al. (2019) Elucidation of glutamine lipid biosynthesis in marine bacteria  
29 reveals its importance under phosphorus deplete growth in *Rhodobacteraceae*. ISME J 13  
30 (1), 39-49.
- 31 72. Varemò, L. et al. (2013) Enriching the gene set analysis of genome-wide data by  
32 incorporating directionality of gene expression and combining statistical hypotheses and  
33 methods. Nucleic Acids Res 41 (8), 4378-91.
- 34 73. Fey, P.D. et al. (2013) A genetic resource for rapid and comprehensive phenotype  
35 screening of nonessential *Staphylococcus aureus* genes. MBio 4 (1), e00537-12.
- 36

## 1 **Figure legends**

2 **Figure 1. EsxC contributes to *S. aureus* membrane architecture.** Bacteria were  
3 grown aerobically to OD<sub>600</sub> of 1. (A) Widefield micrographs of *S. aureus* USA300 JE2  
4 wild-type (WT), its isogenic mutant  $\Delta$ esxC,  $\Delta$ esxC containing the empty pOS1 plasmid,  
5 and the complemented strain  $\Delta$ esxC pesxC (pOS1-esxC) after staining with FM4-64  
6 and DAPI. The composite images were obtained by merging phase contrast and FM4-  
7 64 images. The images are representative of 3 independent experiments. (B) The  
8 FM4-64 fluorescence of bacterial clusters from 9 different fields per strain was  
9 quantitated with ImageJ. Data are shown as box-and-whisker plots, where the  
10 whiskers extend to the highest and lowest FM4-64 intensities, the median is the  
11 vertical bar inside the box, whose ends are the lower and upper quartiles. After a two-  
12 tailed t-test, \*\*\*  $P < 0.001$ . (C) The membrane fluidity of WT and  $\Delta$ esxC was measured  
13 with pyrene decanoic acid staining based assay, and is presented as a percentage of  
14 the WT, which was set to 100%. Data presented are means and error bars represent  
15 standard deviation (SD) of 6 independent experiments. \*\* indicates  $P < 0.01$  using a  
16 Mann-Whitney U test.

17 **Figure 2. Altered surfome in the absence of surface-associated EsxC.** (A)  
18 Immunoblot analysis of membrane (MEMB) or cell wall (CW) fractions of USA300 JE2  
19 wild-type (WT),  $\Delta$ essC, and  $\Delta$ esxC with anti-EsxC sera or anti-PBP2a antibodies  
20 (loading control). (B) Volcano plot of the quantitative proteomic analysis of surface  
21 proteins in  $\Delta$ esxC compared to WT. The relative abundance of each protein (log<sub>2</sub> fold  
22 change, X-axis) and its statistical significance ( $P$  value, Y-axis) are shown in the graph.  
23 Proteins decreased by more than half in  $\Delta$ esxC (log<sub>2</sub> fold change  $< -1$  and  $P$  value  $<$   
24 0.05) are shown in green. (C) The ratios of WT,  $\Delta$ esxC or  $\Delta$ essC bacteria that survived  
25 a 2h-treatment with 0.1% Triton X-100 were determined using the bacterial CFU at  $t =$



1 0 ( $\sim 2 \times 10^8$  CFU/mL). Percentage survival of mutants relative to the WT are shown.  
2 Data presented are means of 4 independent experiments and error bars represent  
3 SD. \* indicates  $P < 0.05$  using a Kruskal-Wallis test with Dunn's test relative to WT.  
4 (D) Representative picture of bacteria before and after a triton-challenge as described  
5 in (C).

6 **Figure 3. Enhanced *S. aureus* growth inhibition by linoleic acid upon *essC* or**  
7 ***esxC* deletion.** (A) *S. aureus* USA300 JE2 wild-type (WT) and the *essC* ( $\Delta essC$ ) or  
8 *esxC* ( $\Delta esxC$ ) deletion mutant were grown in TSB or TSB supplemented with 80  $\mu$ M  
9 of either linoleic (LA) or stearic acid (SA). Data shown are the means  $\pm$  standard error  
10 of the mean (SEM). (B) After 14h of growth as described in (A) Bacteria were serially  
11 diluted, and colony counts were determined. Data presented are the means and the  
12 error bars represent SD of 3 independent experiments. \*\* indicates  $P < 0.01$  using  
13 one-way ANOVA with Dunnett's test relative to WT grown in TSB + LA. (C) USA300  
14 JE2 WT with the empty pOS1 plasmid (WT pOS1) and USA300 JE2 *esxC* mutant with  
15 either pOS1 ( $\Delta esxC$  pOS1) or pOS1-*esxC* ( $\Delta esxC$  pOS1-*esxC*) were grown in TSB or  
16 TSB + 80  $\mu$ M LA as described in (A), plated and counted. Data shown are means and  
17 error bars represent SD of 5 independent experiments. \*\* indicates  $P < 0.01$  using  
18 one-way ANOVA with Dunnett's test relative to WT pOS1 grown in TSB + LA.

19 **Figure 4. T7SS substrates contribute to resistance to linoleic acid toxicity.** (A) *S.*  
20 *aureus* USA300 wild-type (WT) and USA300 *esxA* ( $\Delta esxA$ ) or *esxB* ( $\Delta esxB$ ) deletion  
21 mutants were grown in TSB or TSB supplemented with 80  $\mu$ M linoleic (LA) or stearic  
22 acid (SA). (B) *S. aureus* Newman WT and Newman *esxA* ( $\Delta esxA$ ) or *esxB* ( $\Delta esxB$ )  
23 deletion mutants were grown similarly in TSB or TSB + 40  $\mu$ M LA or SA. (C) Newman  
24 WT with the empty pOS1 plasmid (WT pOS1) and Newman *esxA* mutant with either  
25 pOS1 ( $\Delta esxA$  pOS1) or pOS1-*esxA* ( $\Delta esxA$  pOS1-*esxA*) were grown as described in (B).

1 (D) Growth curves as described in (A) were done with RN6390 wild-type (WT) and  
2 RN6390 *essC* ( $\Delta$ *essC*) or *esxC* ( $\Delta$ *esxC*) deletion mutants. Data shown as in (A), (B),  
3 (C), and (D) are representative of at least 3 independent experiments.

4 **Figure 5. T7SS mutants display an increased membrane permeability upon**  
5 **linoleic acid binding.** (A) Chemical structure of azide functionalised linoleic acid  
6 (azide-LA; *N*<sup>6</sup>-diazo-*N*<sup>2</sup>-((9Z,12Z)-octadeca-9,12-dienoyl)lysine, N<sub>3</sub>-LA). Highlighted in  
7 green is the azido lysine. (B) *S. aureus* USA300 JE2 wild-type (WT) and its *essC*  
8 ( $\Delta$ *essC*) or *esxC* ( $\Delta$ *esxC*) deletion mutants were grown with shaking in TSB to OD<sub>600</sub>  
9 of 1. The bacteria were then stained for 15 min with azide-LA prior to labelling for 1 h  
10 with alkyne Alexa Fluor 488. Fluorescence was measured by a fluorimeter, and data  
11 presented are percentages of  $\Delta$ *essC* and  $\Delta$ *esxC* fluorescence in relation to that of the  
12 WT (100%). Data presented are the means and error bars represent SD of 5  
13 independent experiments. (C) Micrographs of bacteria grown in TSB and treated as  
14 described in (B) and additionally stained with propidium iodide (PI). (D) ImageJ was  
15 used to quantitate PI fluorescence of bacterial clusters from 12 different fields per  
16 strain. Each box-and-whisker plot depicts the minimal and maximal PI intensities, and  
17 the median is the vertical bar inside the box, which is delimited by the lower and  
18 upper quartiles. \*\* indicates  $P < 0.01$  using one-way ANOVA with Dunnett's test.

19 **Fig. 6. T7SS mutants are less able to incorporate LA into their phospholipids.**  
20 Representative HPLC chromatograms of native phosphatidylglycerol (PG) species of  
21 *S. aureus* USA300 JE2 WT (A) or  $\Delta$ *esxC* (B) grown in TSB (top panel) or in TSB  
22 supplemented with LA (bottom panel), in negative ionisation mode. (C-D) Relative  
23 quantification of the indicated PG species containing an unsaturated fatty acid in WT,  
24  $\Delta$ *essC* and  $\Delta$ *esxC*. C18:2-containing PG species (C) and total unsaturated exogenous  
25 PG species (D) are presented as ratios of total PG species. Data shown are the means

1 and error bars represent SD of 3 independent experiments. \* indicates  $P < 0.05$  using  
2 one-way ANOVA with Dunnett's test.

3 **Fig. 7. Quantitative proteomics unveils the changed cellular content of the T7SS**  
4 **mutants and its impact on bacterial response to LA.** *S. aureus* USA300 JE2 wild-  
5 type (WT) and USA300 JE2 mutants ( $\Delta$ essC and  $\Delta$ esxC) were grown in TSB or TSB  
6 supplemented with LA. (A) Venn diagram showing the number of proteins with altered  
7 abundance compared to USA300 JE2 wild-type (WT) specific to  $\Delta$ essC (23) or  $\Delta$ esxC  
8 (10), and common to  $\Delta$ essC and  $\Delta$ esxC (14). (B) The fourteen proteins that are  
9 similarly changed in both *essC* and *esxC* mutants are highlighted on a volcano plot.  
10 (C) Volcano plot showing the extensive change in the LA-treated WT compared to WT.  
11 (D) Venn diagram displaying the numbers of proteins with altered relative abundance  
12 upon LA challenge of WT (LA.WT),  $\Delta$ essC (LA.dEssC) or  $\Delta$ esxC (LA.dEsxC)  
13 compared to the respective untreated samples. (E) and (F) Heatmaps depicting the  $P$   
14 values of enriched (E) or diminished (F) molecular functions following a gene set  
15 analysis based on GO (gene ontology) annotations. Molecular functions that are  
16 changed in at least one strain ( $P < 0.05$ ) following growth in presence of LA are shown.  
17 The shades of blue (E) or red (F) correspond to  $-\log_{10}(P \text{ value})$ .

18 **Figure S1. USA300 JE2 WT and  $\Delta$ esxC strains display similar growth rates.** WT  
19 and  $\Delta$ esxC were grown in TSB, and  $OD_{600}$  monitored with a Novaspec<sup>®</sup> Pro  
20 spectrophotometer. Data shown are means of three independent experiments, and  
21 the error bars indicate the standard errors of the mean.

22 **Figure S2. USA300 JE2 WT and T7SS mutants display similar lipids.**  
23 Representative HPLC chromatograms of the indicated bacteria grown in TSB (A) or in

1 TSB supplemented with LA (*B*), in negative ionisation mode. Phosphatidylglycerol  
2 (PG) is highlighted.

3 **Figure S3.  $\Delta$ essC can incorporate LA into its phosphatidylglycerol (PG) species.**

4 Representative HPLC chromatograms of native PG species of  $\Delta$ essC grown in TSB  
5 (top panel) or in TSB supplemented with LA (bottom panel), in negative ionisation  
6 mode.

7 **Figure S4. LA (C18:2) is elongated and incorporated into *S. aureus***

8 **phosphatidylglycerol (PG) species.** Representative mass spectrometry

9 fragmentation spectra for PG species containing unsaturated fatty acids, in negative

10 ionisation mode. (A) PG species with mass 731 m/z, containing C18:2 fatty acid (279

11 m/z). (B) PG species 759 m/z, containing C20:2 fatty acid (307 m/z) (C) PG species

12 787 m/z, containing C22:2 fatty acid (335 m/z).

13 **Figure S5. PG species containing elongated LA are present in USA300 JE2 WT**

14 **and T7SS mutants.** Relative quantification of the indicated PG species containing an

15 unsaturated fatty acid in WT,  $\Delta$ essC and  $\Delta$ esxC. C20:2- (A) and C22:2-containing PG

16 species (B) are presented as ratios of total PG species. Data shown are the means

17 and error bars represent SD of 3 independent experiments.

18 **Figure S6. Principal component analysis (PCA) of the *S. aureus* cellular**

19 **proteomic profiles.** PCA were performed on all the identified proteins of USA300

20 JE2 WT and T7SS mutants grown in TSB (untreated) or TSB + LA (LA-treated).

21 Each dot represents a biological replicate.

22 **Figure S7.  $^1\text{H}$  NMR spectra of NHS-LA (A) and azide-LA (B) in  $\text{CDCl}_3$ .** Both

23 spectra were recorded on a Bruker Advance 300 spectrometer (300 MHz) at 27 °C.

- 1 The letters indicate the chemical shift  $\delta$  (in parts per million, ppm) of the protons in
- 2 each molecule.
- 3

**Table 1. Surface proteins significantly changed in *AesxC* mutant relative to WT USA300 JE2.**

| Uniprot ID | log <sub>2</sub> FC | P Value | Description                                            | Localization  |
|------------|---------------------|---------|--------------------------------------------------------|---------------|
| A0A0H2XJV9 | 0.7                 | 0.0069  | Surface protein G                                      | Cell wall     |
| A0A0H2XHF6 | 0.7                 | 0.0383  | Secretory antigen SsaA                                 | Extracellular |
| Q2FE03     | 0.6                 | 0.0350  | Fibronectin-binding protein A FnbA                     | Cell wall     |
| Q2FG28     | -1.7                | 0.0217  | Putative universal stress protein                      | Cytoplasm     |
| A0A0H2XFG6 | -1.4                | 0.0110  | Uncharacterized secreted protein                       | Extracellular |
| Q2FFJ6     | -1.4                | 0.0326  | Amidotransferase subunit B GatB                        | Cytoplasm     |
| A0A0H2XFP1 | -1.2                | 0.0281  | ESAT-6 secretion accessory factor EsaA                 | Membrane      |
| A0A0H2XGD7 | -1.1                | 0.0002  | ATP-dependent 6-phosphofructokinase PfkA               | Cytoplasm     |
| Q2FI15     | -1.1                | 0.0003  | Bifunctional protein FOLD                              | Cytoplasm     |
| Q2FEV0     | -1.1                | 0.0046  | Alkaline shock protein 23                              | Cytoplasm     |
| A0A0H2XIJ1 | -1.1                | 0.0322  | Enoyl-[acyl-carrier-protein] reductase [NADPH] FabI    | Cytoplasm     |
| Q2FJM6     | -1.0                | 0.0345  | Inosine-5-monophosphate dehydrogenase                  | Cytoplasm     |
| A0A0H2XDE4 | -0.9                | 0.0130  | Transcriptional regulator MgrA                         | Cytoplasm     |
| Q2FJM5     | -0.9                | 0.0140  | GMP synthase [glutamine-hydrolyzing]                   | Cytoplasm     |
| Q2FFV6     | -0.9                | 0.0182  | S-adenosylmethionine synthase MetK                     | Cytoplasm     |
| A0A0H2XGP3 | -0.8                | 0.0339  | UDP-N-acetylglucosamine 1-carboxyvinyltransferase MurA | Cytoplasm     |
| Q2FJA0     | -0.8                | 0.0421  | 50S ribosomal protein L7/L12                           | Cytoplasm     |
| A0A0H2XH82 | -0.7                | 0.0202  | Putative lipoprotein                                   | Membrane      |
| Q2FJE0     | -0.7                | 0.0378  | 50S ribosomal protein L25                              | Cytoplasm     |
| A0A0H2XFW2 | -0.6                | 0.0035  | Universal stress family protein                        | Cytoplasm     |
| Q2FG40     | -0.5                | 0.0373  | Pyruvate kinase                                        | Cytoplasm     |
| Q2FHV1     | -0.5                | 0.0423  | Iron-regulated surface determinant protein A IsdA      | Cell wall     |
| Q2FID4     | -0.4                | 0.0421  | NADH dehydrogenase-like protein                        | Cytoplasm     |

**Table 2. Proteins with changed abundance in  $\Delta$ essC and  $\Delta$ esxC mutants relative to the WT USA300 JE2**

| Functions                   | Uniprot ID | $\Delta$ essC/WT    |                  | $\Delta$ esxC/WT    |                  | Description                                                  |
|-----------------------------|------------|---------------------|------------------|---------------------|------------------|--------------------------------------------------------------|
|                             |            | Log <sub>2</sub> FC | Adjusted P value | Log <sub>2</sub> FC | Adjusted P value |                                                              |
| Signal transduction systems | Q2FK09     | -3.0                | 4.90E-13         | -3.1                | 4.90E-13         | Sensory transduction protein LytR                            |
|                             | Q2FH23     | -2.9                | 0.002527         | -2.1                | 0.026184         | Response regulator ArlR                                      |
| Membrane proteins           | A0A0H2XF42 | 3.0                 | 1.75E-10         | 0                   | 1                | Cytochrome D ubiquinol oxidase, subunit I                    |
|                             | A0A0H2XDZ5 | 1.7                 | 1.68E-05         | 0                   | 1                | Uncharacterized membrane protein                             |
|                             | A0A0H2XFJ8 | 2.0                 | 0.001077         | 0.5                 | 0.883953         | Uracil permease                                              |
|                             | A0A0H2XGW7 | 2.7                 | 0.005757         | 2.5                 | 0.010784         | Putative lipoprotein                                         |
|                             | A0A0H2XIA9 | 1.0                 | 0.006115         | 0                   | 1                | Protein translocase subunit SecY                             |
|                             | Q2FIN2     | 1.6                 | 0.029451         | 0.5                 | 0.970614         | Prolipoprotein diacylglyceryl transferase LGT                |
|                             | A0A0H2XKD9 | 2.0                 | 0.038093         | 1.8                 | 0.070347         | Staphylococcal respiratory response protein SrrB             |
|                             | A0A0H2XFE1 | 3.4                 | 0.039814         | 1.1                 | 0.970614         | Peptidase                                                    |
|                             | A0A0H2XJV8 | 2.0                 | 0.04444          | 1.5                 | 0.231285         | Cyclic-di-AMP phosphodiesterase                              |
|                             | A0A0H2XGF4 | 3.0                 | 0.044681         | 0.9                 | 0.986458         | Sodium:dicarboxylate symporter family protein                |
| Stress response             | A0A0H2XHV2 | 2.5                 | 0.049168         | 2.4                 | 0.070182         | Glycine betaine transporter OpuD                             |
|                             | A0A0H2XKH6 | 2.2                 | 5.80E-05         | 2.5                 | 1.07E-05         | Universal stress protein family                              |
| DNA repair                  | A0A0H2XIZ0 | 0.0                 | 1                | -3.4                | 1.06E-10         | OsmC/Ohr family protein                                      |
|                             | Q2FHE2     | -2.3                | 1.79E-08         | -2.3                | 1.19E-08         | DNA mismatch repair protein MutL                             |
|                             | A0A0H2XI63 | -2.0                | 0.004036         | -2.0                | 0.004036         | DNA repair protein RadA                                      |
| Oxidation-reduction process | A0A0H2XHT1 | -0.3                | 0.708343         | -1.9                | 0.008379         | Formamidopyrimidine-DNA glycosylase MutM                     |
|                             | A0A0H2XJ90 | 1.1                 | 0.038093         | 1.0                 | 0.088334         | D-isomer specific 2-hydroxyacid dehydrogenase family protein |
|                             | A0A0H2XHE0 | 2.4                 | 0.039099         | -0.1                | 1                | Thiol-disulphide oxidoreductase, DCC family protein          |
|                             | A0A0H2XGR9 | 0.0                 | 1                | 1.4                 | 8.89E-08         | Oxidoreductase, Gfo/Idh/MocA family                          |
|                             | A0A0H2XK08 | 1.0                 | 0.406975         | 2.9                 | 0.00791          | Oxidoreductase, short chain dehydrogenase/reductase family   |
| Hydrolases                  | A0A0H2XFZ3 | -0.8                | 0.404225         | 2.1                 | 0.016405         | Nitroreductase family protein                                |
|                             | A0A0H2XE49 | 2.9                 | 1.07E-06         | 2.9                 | 5.99E-07         | Amidohydrolase                                               |
|                             | Q2FES9     | -2.7                | 0.003385         | -0.3                | 1                | Uncharacterized hydrolase                                    |
|                             | A0A0H2XFF2 | -0.8                | 0.016697         | -0.5                | 0.157809         | Peptidase, U32 family                                        |
|                             | A0A0H2XJH8 | 0.0                 | 1                | 2.8                 | 1.06E-10         | Peptidase M20 domain-containing protein 2                    |
|                             | A0A0H2XJ54 | 0.0                 | 1                | 2.0                 | 0.000949         | Hydrolase (HAD superfamily)                                  |
| Metabolism                  | Q2FEG2     | -0.2                | 0.854748         | -2.9                | 0.004615         | Formimidoylglutamase                                         |
|                             | A0A0H2XGU2 | -1.6                | 4.99E-06         | -0.1                | 1                | Pseudouridine synthase                                       |
|                             | A0A0H2XK15 | 2.8                 | 0.004424         | 0.9                 | 0.777138         | 1-phosphatidylinositol phosphodiesterase                     |
|                             | Q2FEK2     | -1.6                | 0.038093         | -0.3                | 1                | Urease accessory protein UreE                                |
|                             | Q2FI05     | 1.1                 | 0.038093         | 0.0                 | 1                | Bifunctional purine biosynthesis protein PurH                |
|                             | Q2FIL2     | 2.9                 | 0.038093         | 0.8                 | 0.970614         | SsrA-binding protein                                         |
|                             | A0A0H2XII6 | 1.8                 | 0.038093         | 1.5                 | 0.088334         | Orn/Lys/Arg decarboxylase                                    |
| Cell wall composition       | A0A0H2XJR8 | -0.9                | 0.04444          | -0.5                | 0.61246          | RNA methyltransferase, RsmD family                           |
|                             | A0A0H2XKG7 | 0.0                 | 1                | 1.4                 | 8.18E-08         | Aspartokinase                                                |
|                             | A0A0H2XJQ4 | -4.0                | 4.92E-11         | -4.0                | 3.28E-11         | Acetyltransferase, GNAT family                               |
|                             | A0A0H2XKG3 | -2.3                | 0.001238         | -1.7                | 0.016405         | Fibronectin binding protein B                                |
| Nucleotide binding          | A0A0H2XJC8 | -2.3                | 0.009779         | -3.0                | 0.000819         | Phi77 ORF017-like protein (Toxin MazF)                       |
|                             | Q2FE03     | 0.0                 | 1                | 2.6                 | 1.18E-12         | Fibronectin-binding protein A                                |
| Uncharacterised proteins    | A0A0H2XHY5 | -2.3                | 8.58E-06         | -2.3                | 6.01E-06         | ATP-grasp domain protein                                     |
|                             | A0A0H2XFA5 | 3.3                 | 0.014259         | 3.5                 | 0.008379         | Putative GTP-binding YqeH protein                            |
|                             | A0A0H2XGJ8 | 2.2                 | 0.000372         | 2.4                 | 9.41E-05         | Uncharacterized protein                                      |
|                             | A0A0H2XE09 | 2.1                 | 0.008231         | 1.9                 | 0.016405         | Ybbr-like uncharacterized protein                            |
| Uncharacterised proteins    | Q2FFI4     | 3.4                 | 0.020136         | 0.9                 | 0.970614         | UPF0316 membrane protein                                     |
|                             | A0A0H2XG24 | 1.1                 | 0.022345         | 0.8                 | 0.088334         | Uncharacterized protein                                      |

**Table 3.** Strains and plasmids used in this study.

| Strain or plasmid                   | Description                                                                                     | Source or reference        |
|-------------------------------------|-------------------------------------------------------------------------------------------------|----------------------------|
| <b><i>Staphylococcus aureus</i></b> |                                                                                                 |                            |
| USA300 LAC                          | Community-acquired MRSA (CA-MRSA)                                                               | Olaf Schneewind            |
| LAC $\Delta$ esxA                   | <i>S. aureus</i> USA300 LAC defective for EsxA                                                  | [21]                       |
| LAC $\Delta$ esxB                   | <i>S. aureus</i> USA300 LAC defective for EsxB                                                  | [21]                       |
| USA300 LAC JE2                      | Plasmid-cured USA300 LAC                                                                        | BEI Resources (NARSA) [73] |
| JE2 $\Delta$ esxC                   | <i>S. aureus</i> USA300 LAC JE2 defective for EsxC                                              | This study                 |
| JE2 $\Delta$ essC                   | <i>S. aureus</i> USA300 LAC JE2 defective for EssC                                              | This study                 |
| Newman                              | Methicillin-sensitive <i>Staphylococcus aureus</i>                                              | Olaf Schneewind            |
| Newman $\Delta$ esxA                | <i>S. aureus</i> Newman defective for EsxA                                                      | [21]                       |
| Newman $\Delta$ esxB                | <i>S. aureus</i> Newman defective for EsxB                                                      | [21]                       |
| RN6390                              | NCTC8325 derivative, $\Delta$ rbsU, $\Delta$ tcaR, cured of $\phi$ 11, $\phi$ 12, and $\phi$ 13 | Tracy Palmer [14]          |
| RN6390 $\Delta$ esxC                | <i>S. aureus</i> RN6390 defective for EsxC                                                      | Tracy Palmer [14]          |
| RN6390 $\Delta$ essC                | <i>S. aureus</i> RN6390 defective for EssC                                                      | Tracy Palmer [14]          |
| RN4220                              | <i>S. aureus</i> restriction negative, cloning tool                                             | BEI Resources (NARSA)      |
| <b>Plasmids</b>                     |                                                                                                 |                            |
| pKORI                               | Temperature-sensitive allelic exchange vector                                                   | Olaf Schneewind [33]       |
| pKORI $\Delta$ essC                 | pKORI used to generate essC mutant                                                              | This study                 |
| pKORI $\Delta$ esxC                 | pKORI used to generate esxC mutant                                                              | This study                 |
| pOS1                                | Insertless vector for genetic complementation                                                   | Olaf Schneewind            |
| pOS1CK                              | pOS1 with P1 constitutive promoter of sarA                                                      | [21]                       |
| pOS1-esxA                           | esxA complementation vector                                                                     | [21]                       |
| pOS1-esxC                           | esxC complementation vector                                                                     | This study                 |



**Table 4.** Primers used in this study.

| <b>Primer</b>        | <b>Sequence (5' – 3')</b>                           | <b>Product</b> |
|----------------------|-----------------------------------------------------|----------------|
| AttB1-esxC Up-Fwrd   | GGGGACAAGTTTGTACAAAAAAGCAGGCTGAGCTAACGCTATGAAAACACC | AttB1-         |
| esxC-up-Rev-soeing   | ACCCATATCTTCACCTCAATAAACATACCTCCCTCCTATTT           | $\Delta$ esxC- |
| esxC-down-Fwd        | TATTGAGGTGAAGATATGGGTGG                             | AttB2          |
| esxC-down-Rev-attB2  | GGGGACCACTTTGTACAAGAAAGCTGGGTCGTCATTACTCCTCTGCTTTA  |                |
| AttB1-essC-up-fwd    | GGGGACAAGTTTGTACAAAAAAGCAGGCTGCTACACATTTGTGTTGGCACC | AttB1-         |
| essC-upstream-rev    | TGTCTTTCCTCAGTCCTATAC                               | $\Delta$ essC- |
| essC-dpwn-soeing-fwd | GTATAGGACTGAGGCAAAGACACAATGAATTAATAGGAGGGAGG        | AttB2          |
| esxC-down-Rev-attB2  | GGGGACCACTTTGTACAAGAAAGCTGGGTCGTCATTACTCCTCTGCTTTA  |                |
| esxC-RBS-PstI-fwd    | GCGCTGCAGTTGAGAGGAGAGAAAATGAATTTAATGATATTGAAAC      | RBS-           |
| esxC-SmaI-rev        | GCGGCGCCCGGGTTAATTCATTGCTTTATTA                     | esxC           |

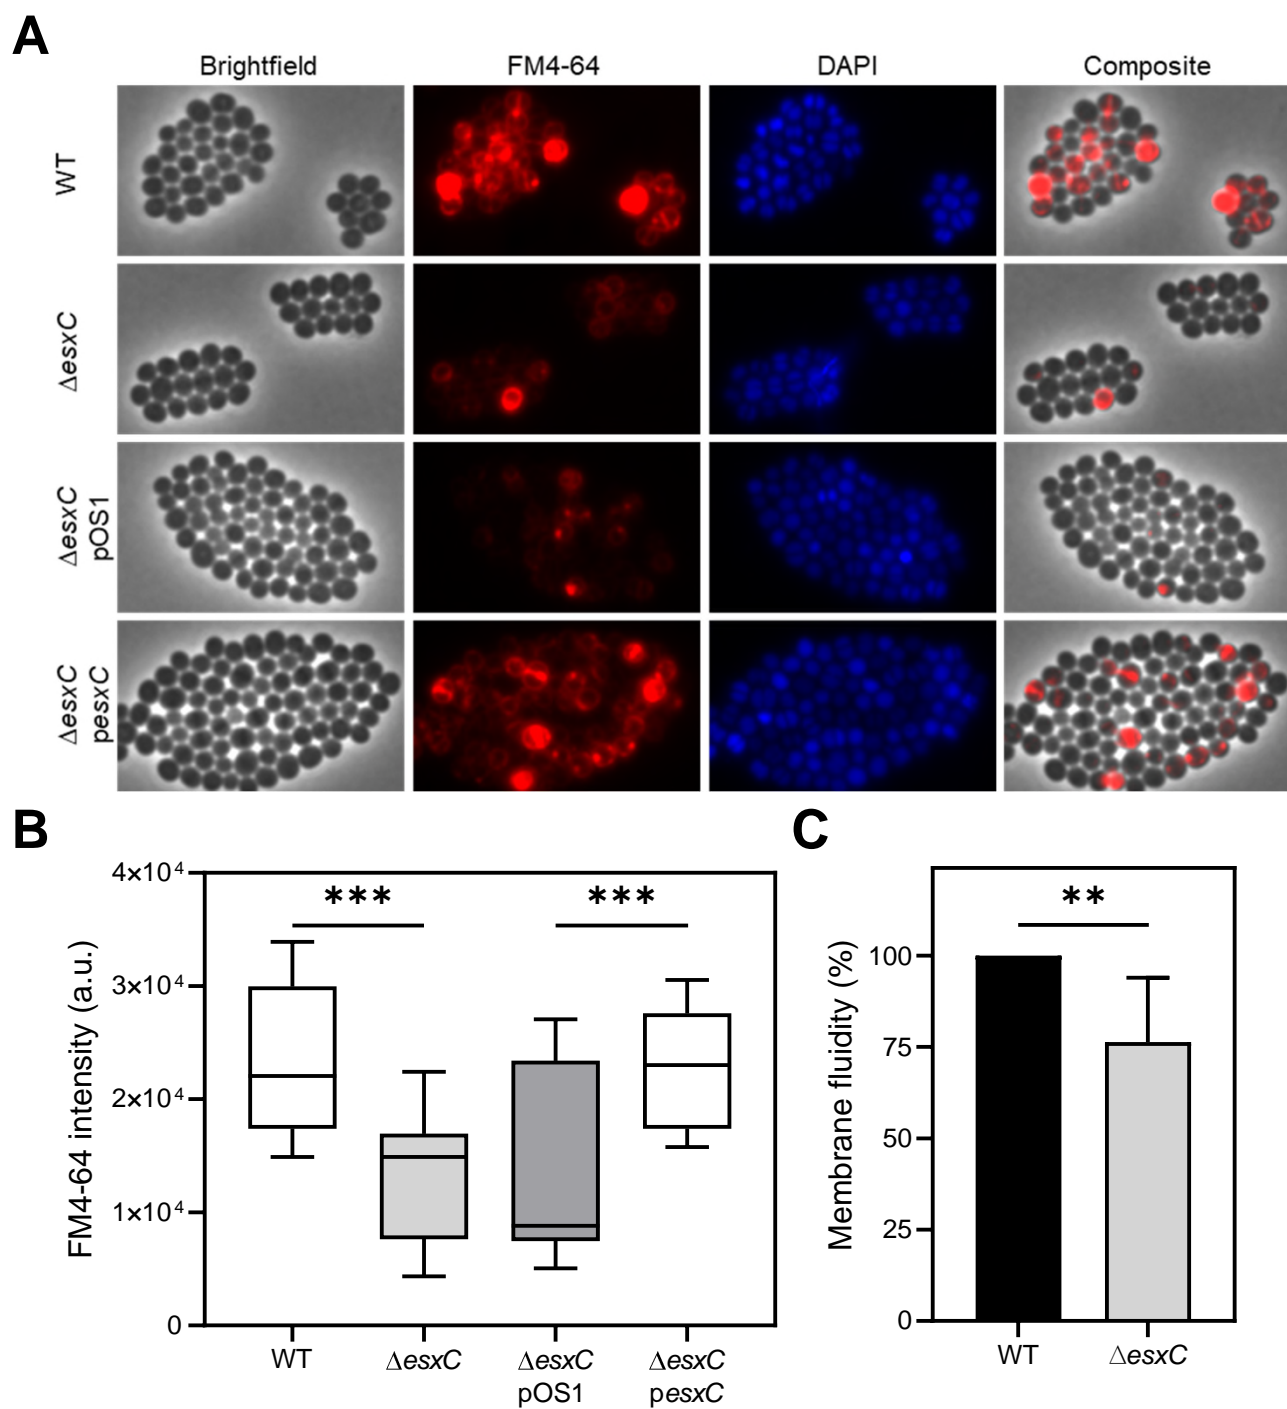

**Fig. 1**

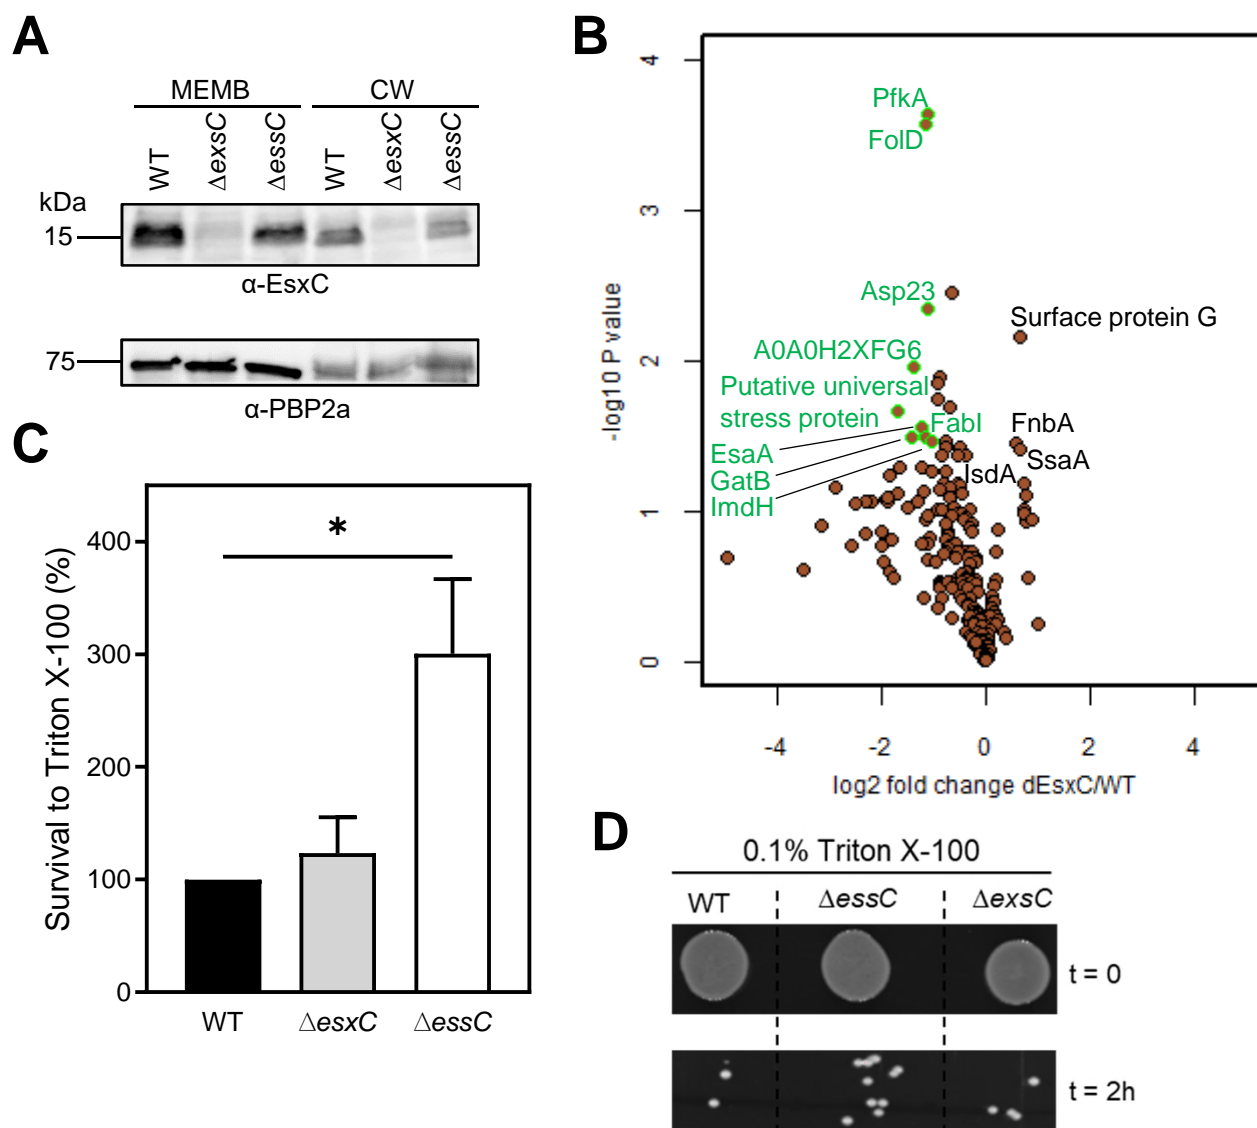

**Fig. 2**

**A**

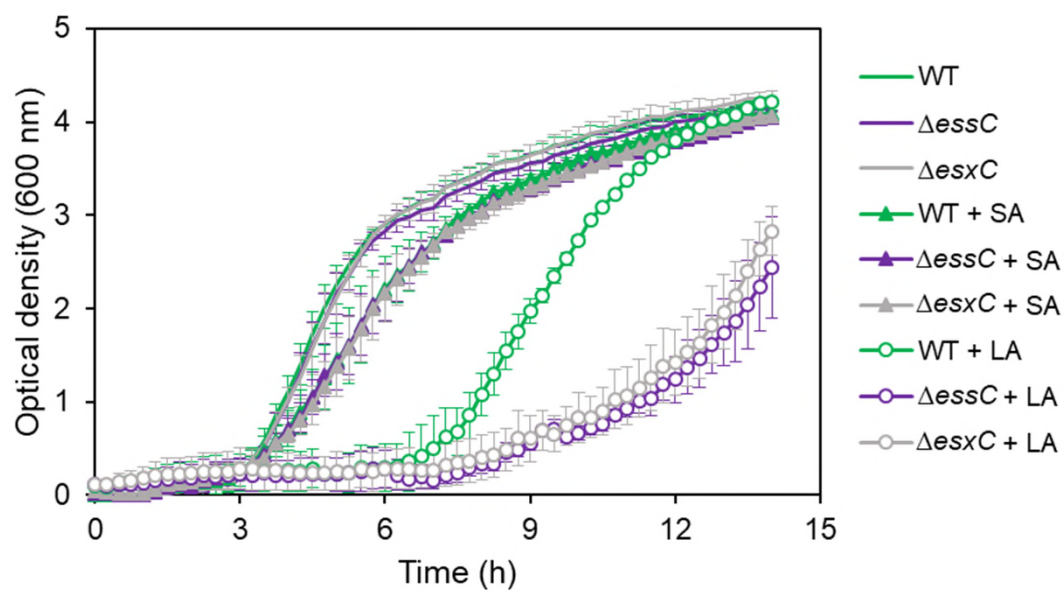

**B**

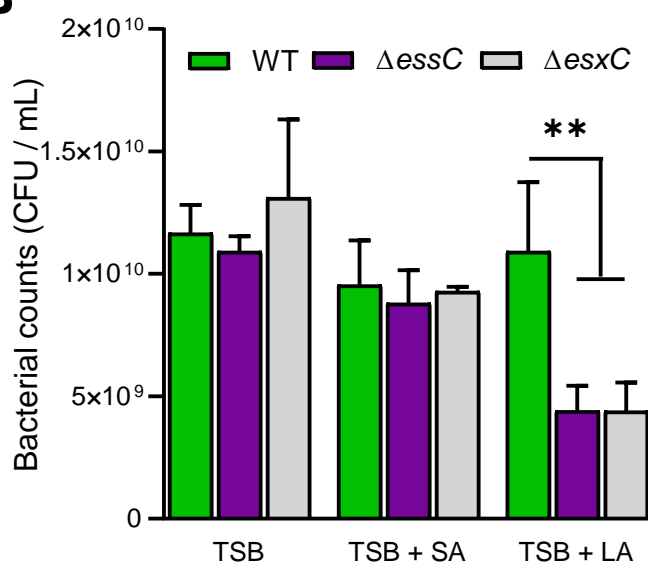

**C**

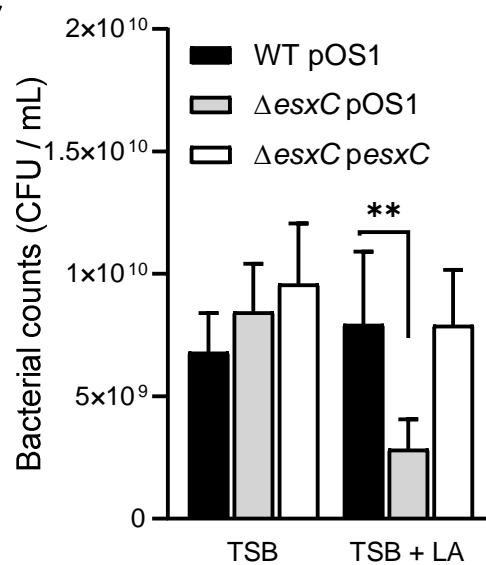

**Fig. 3**

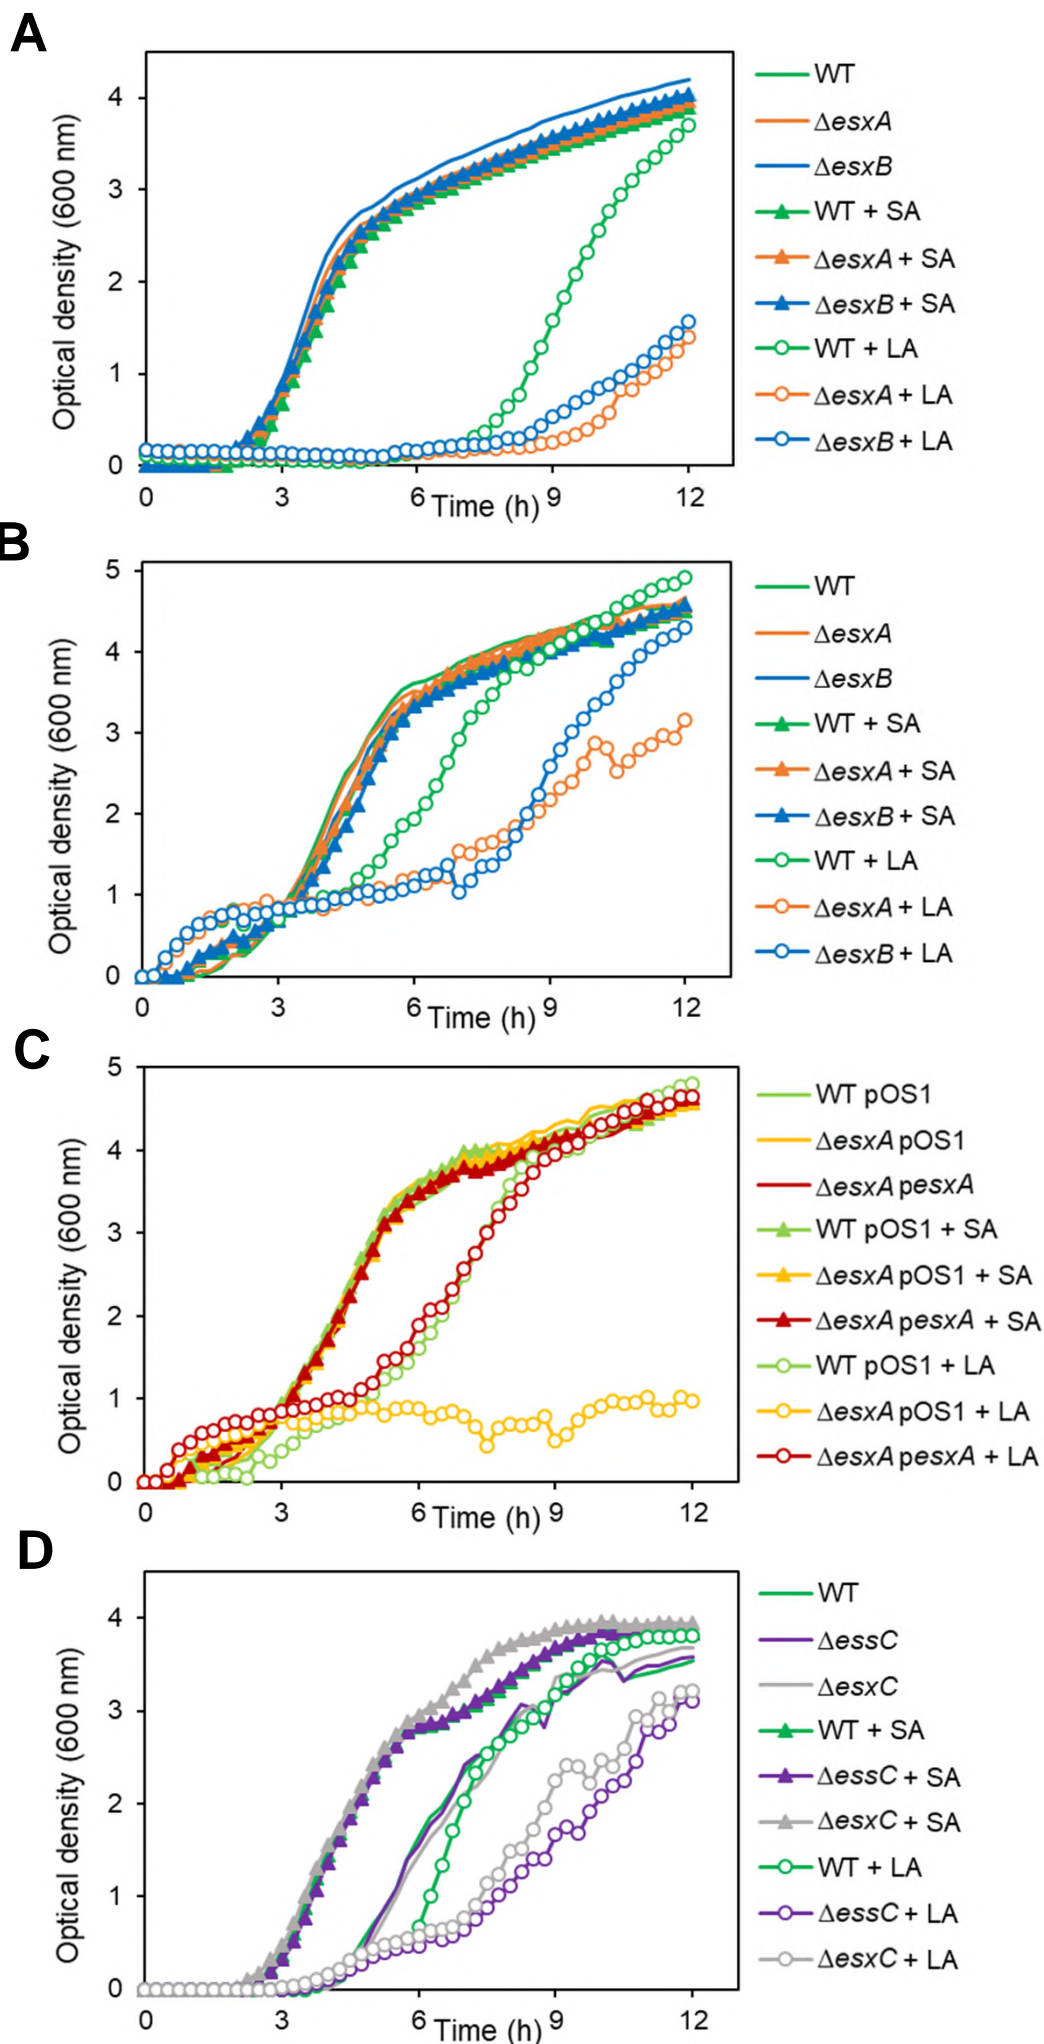

**Fig. 4**

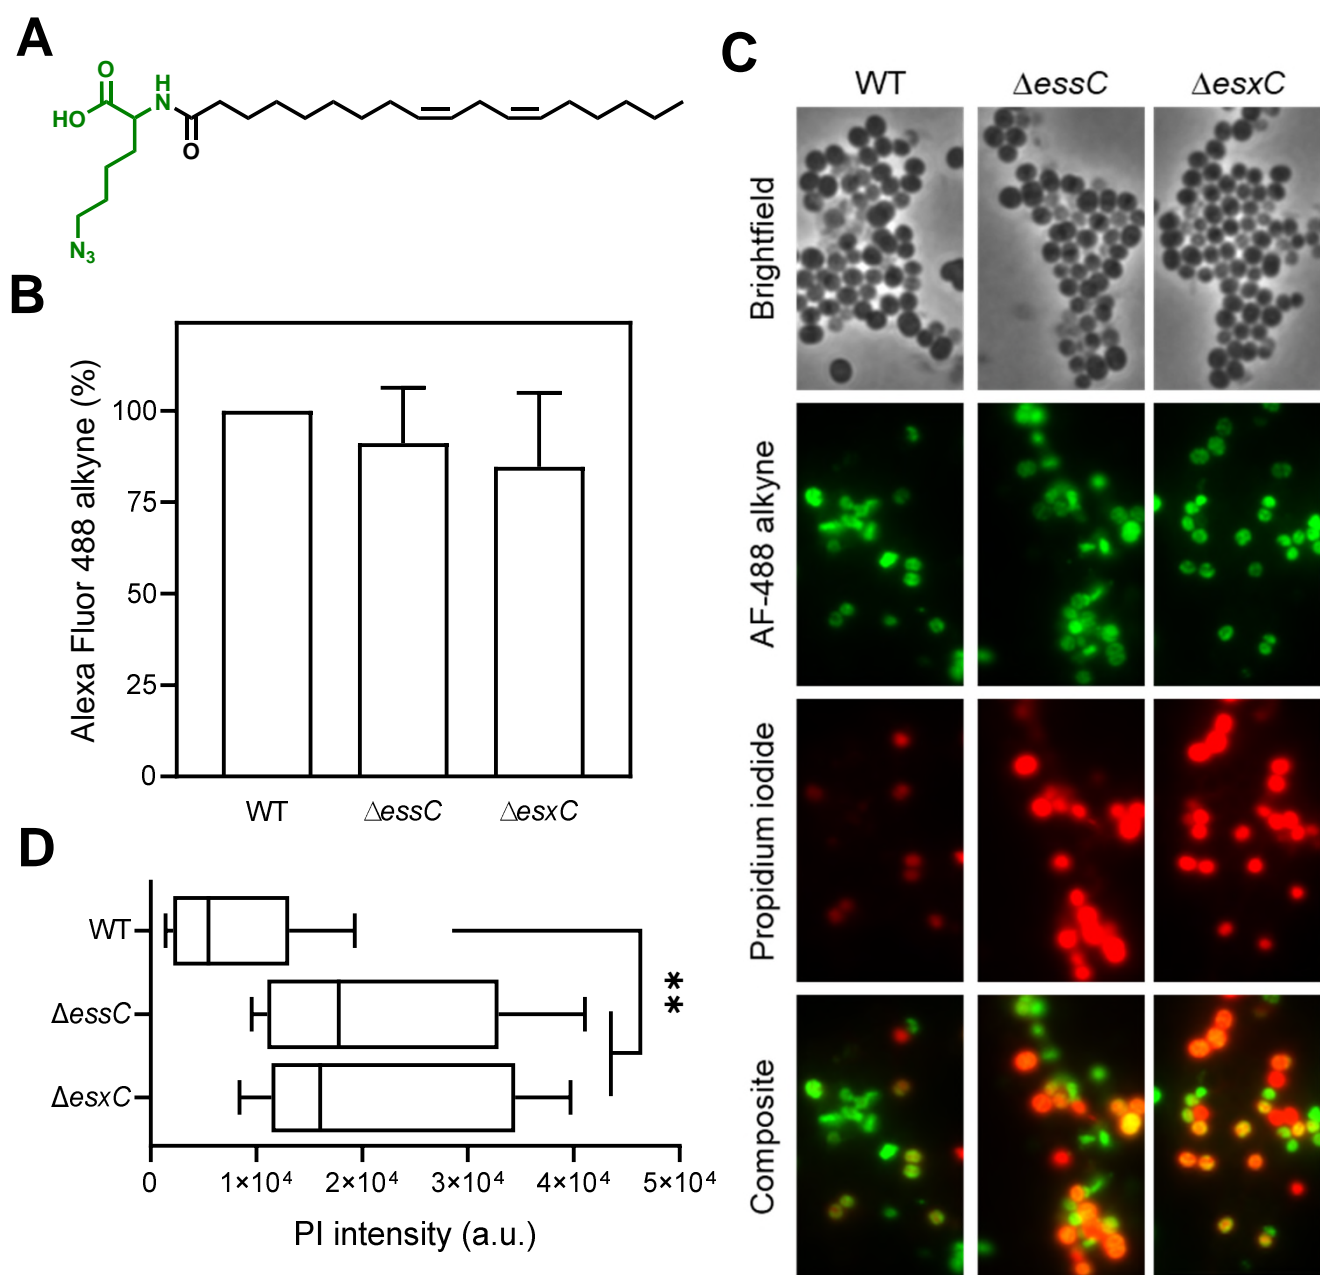

**Fig. 5**

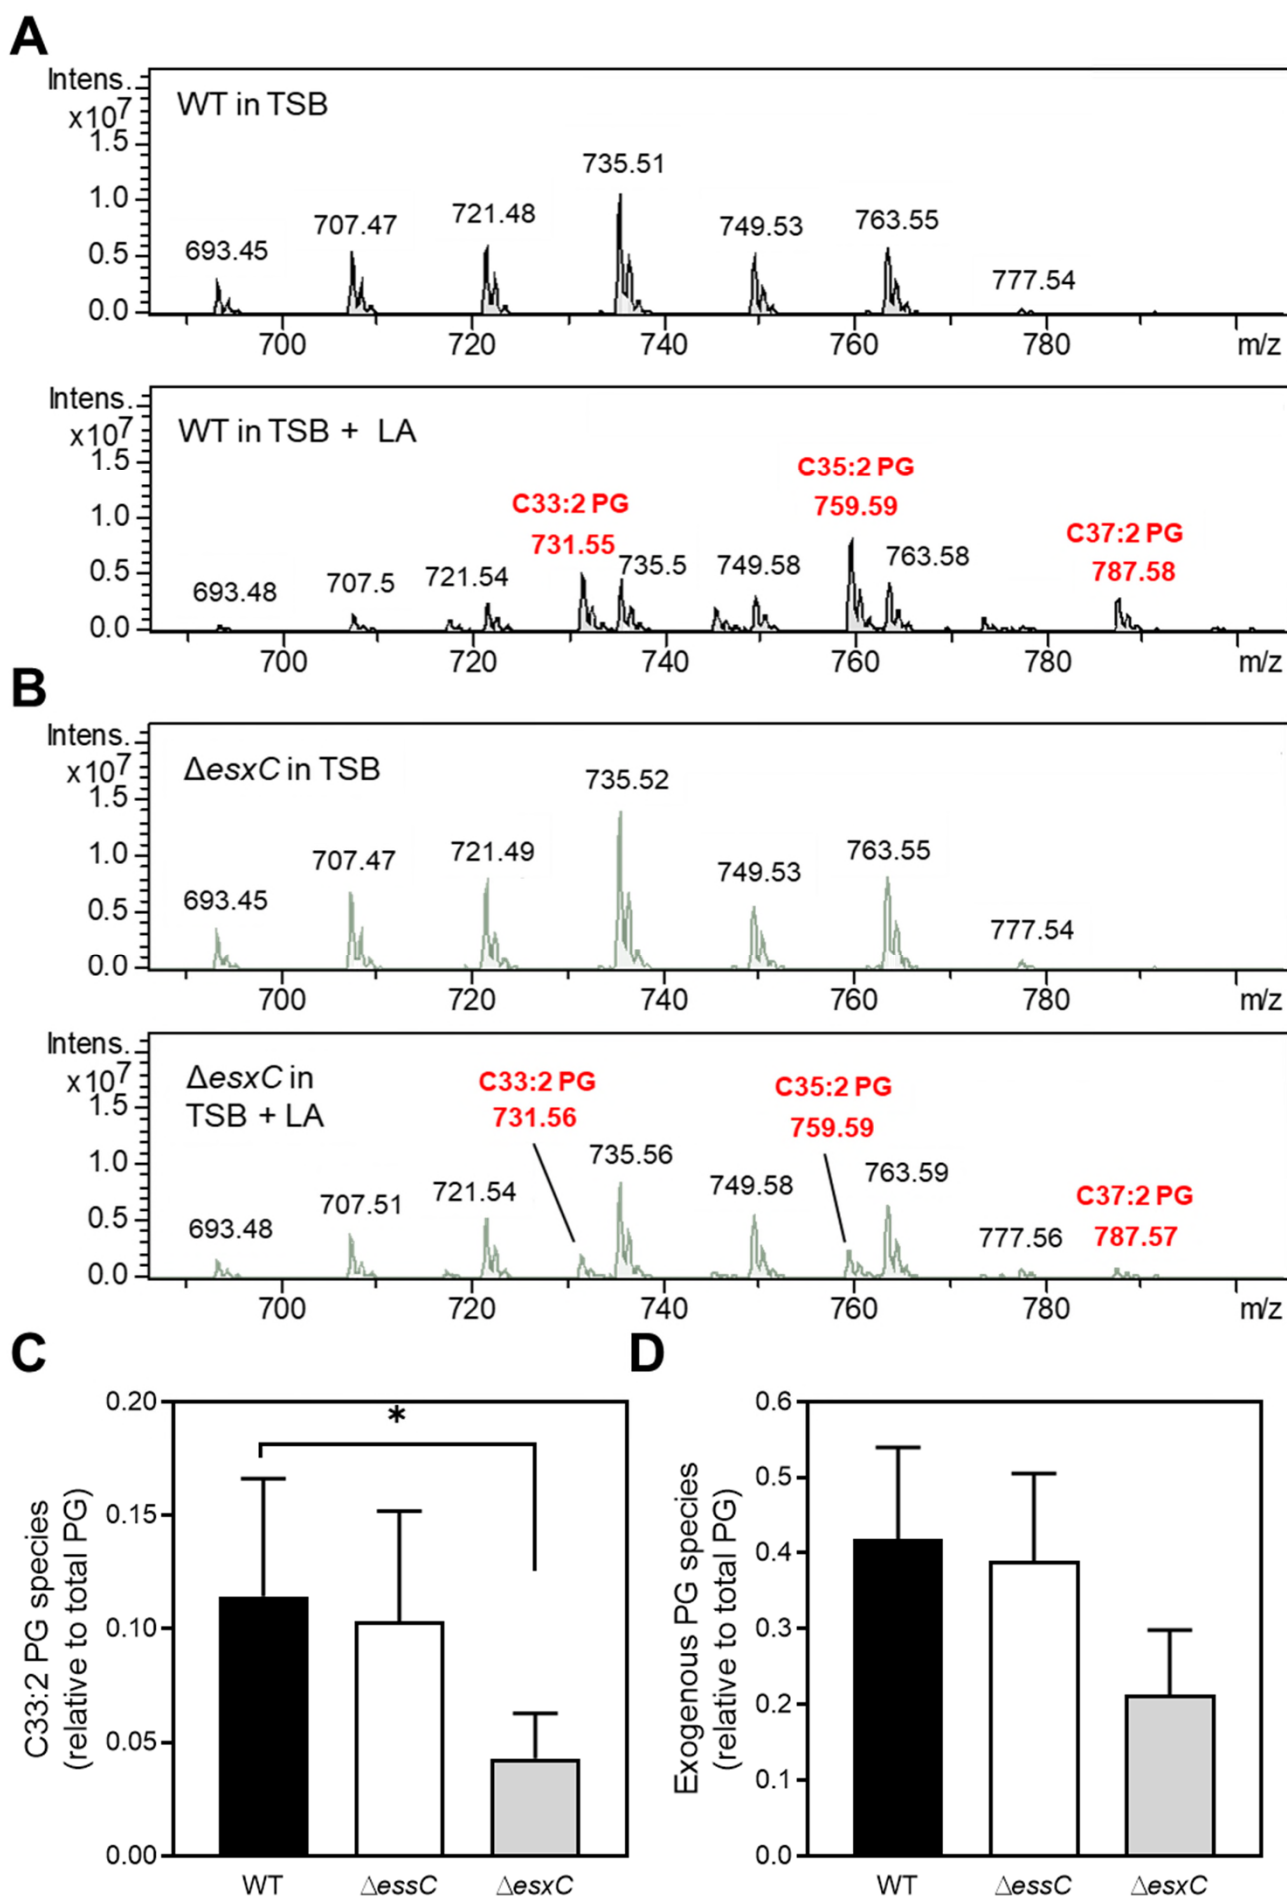

**Fig. 6**

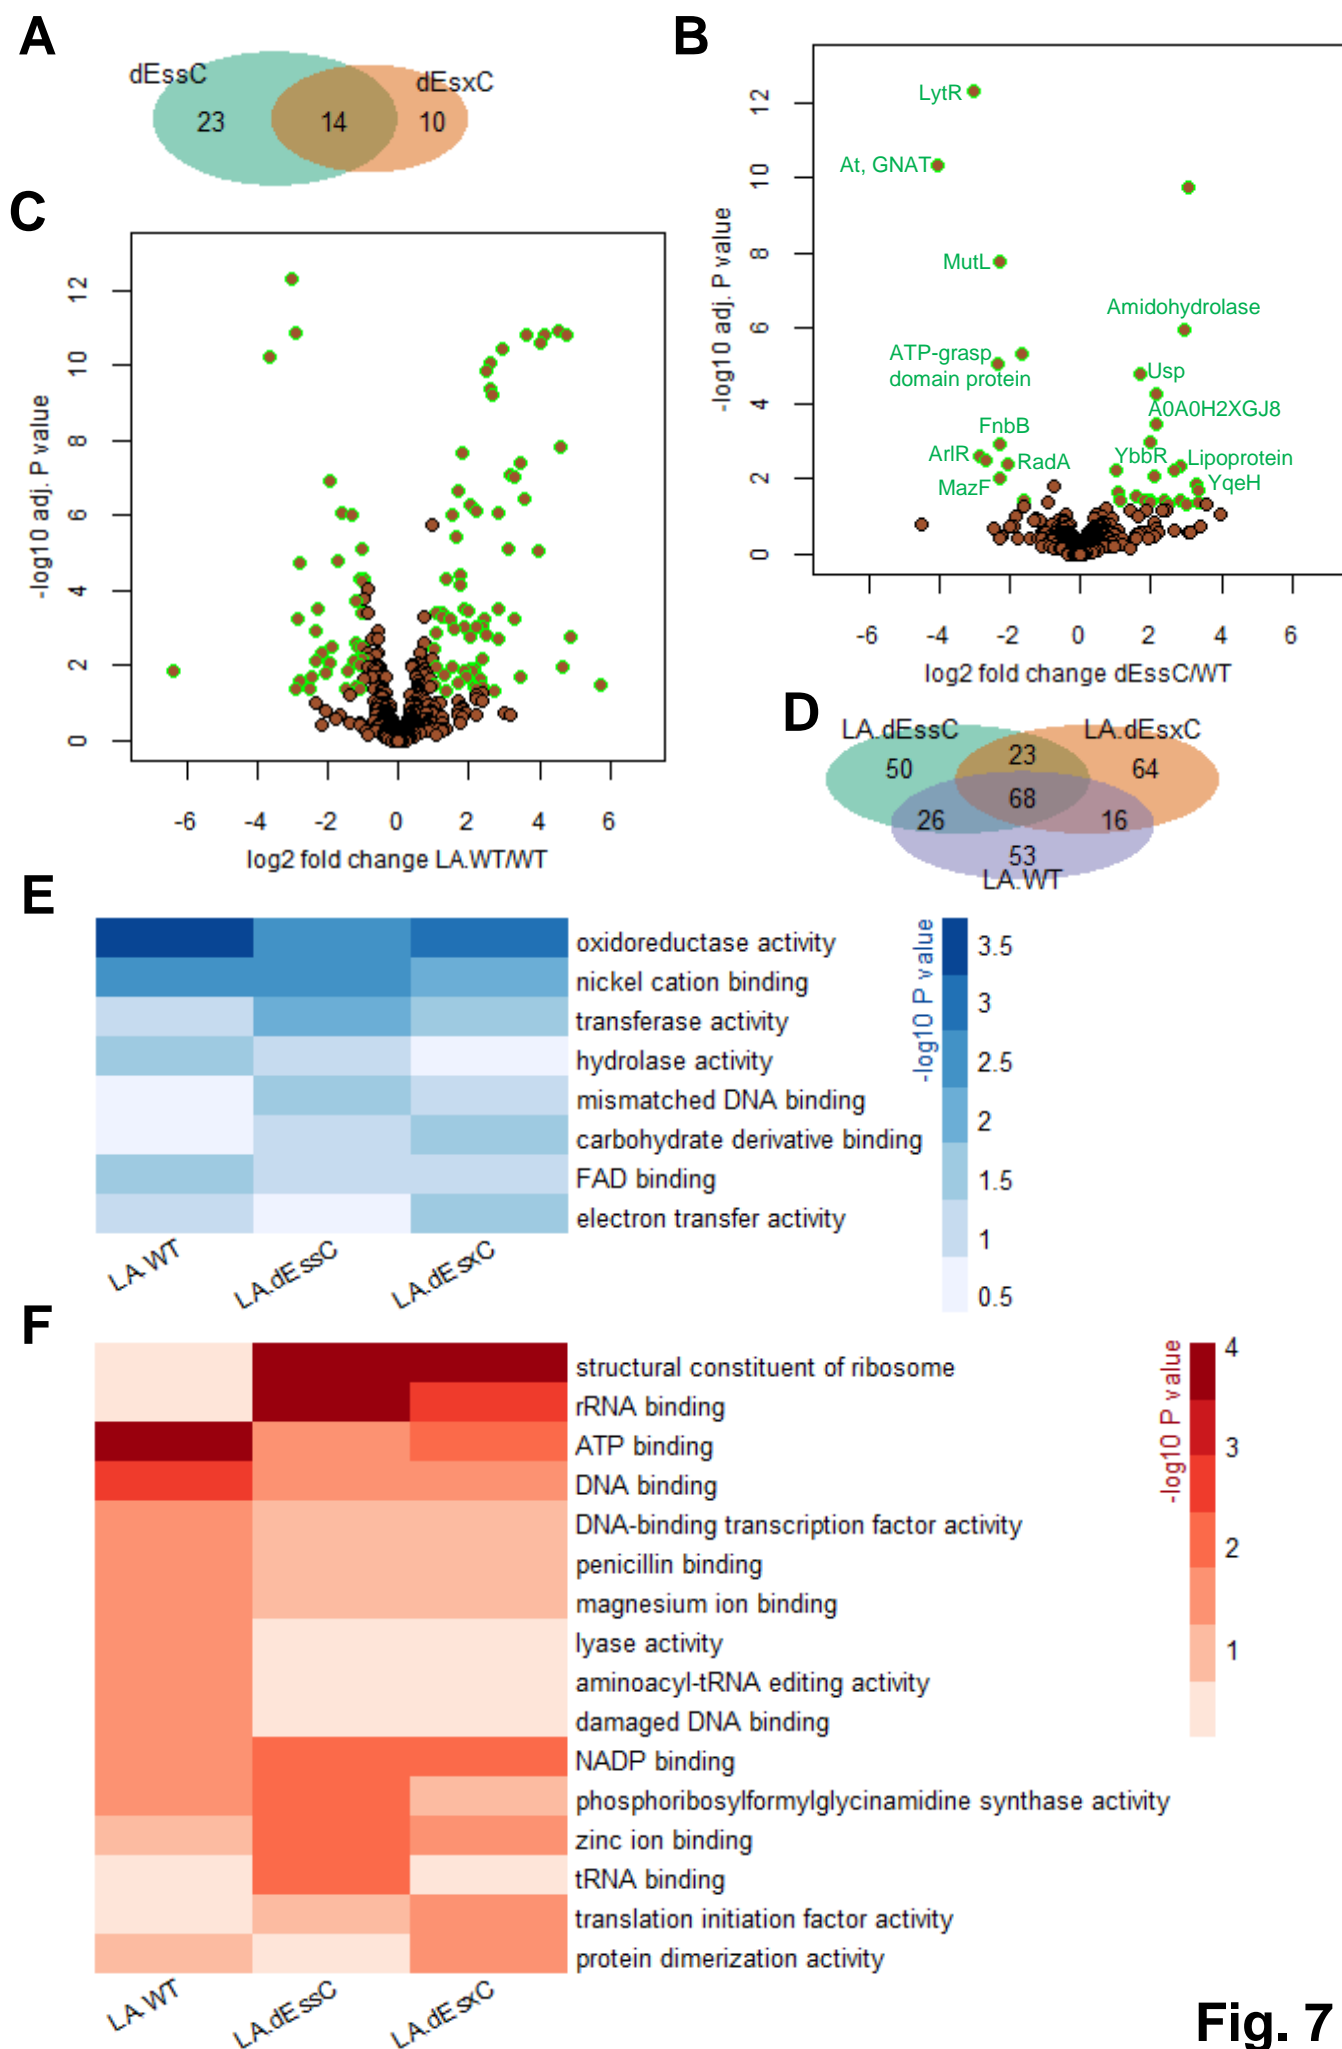

**Fig. 7**



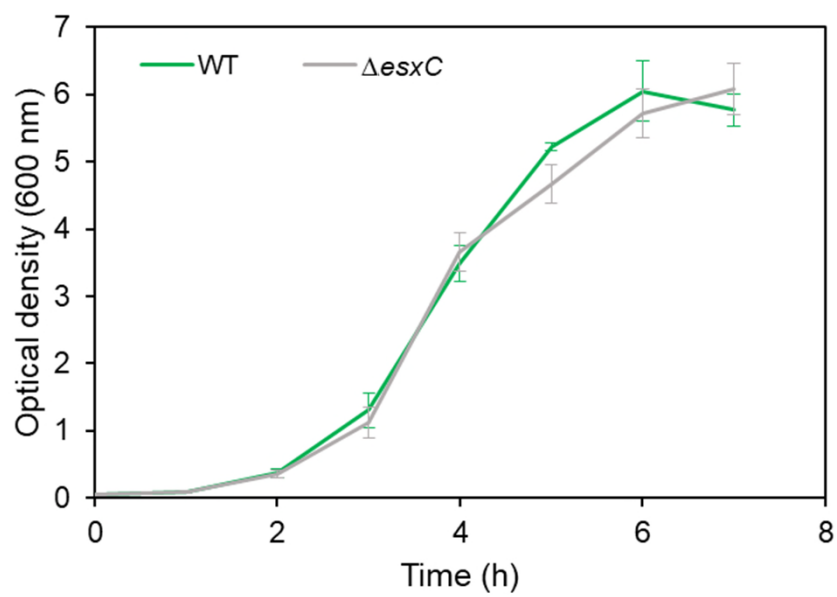

**Fig. S1**

**A**

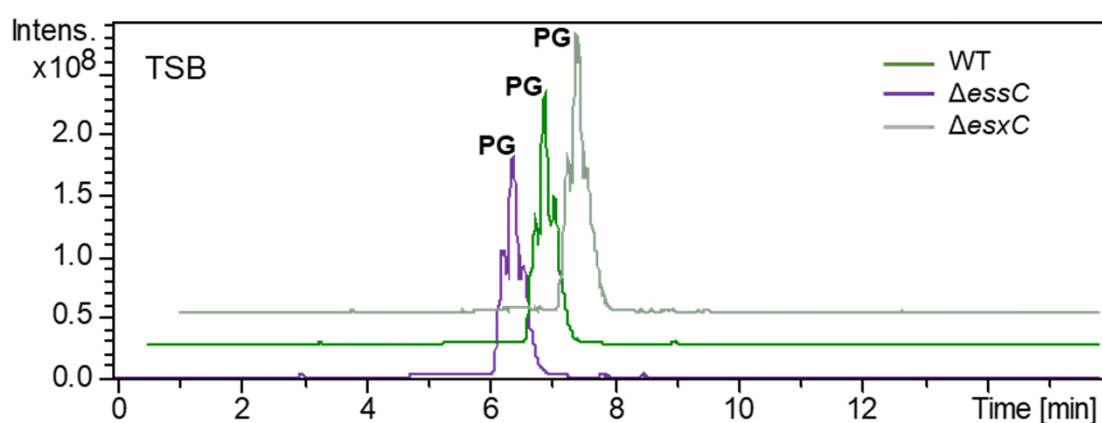

**B**

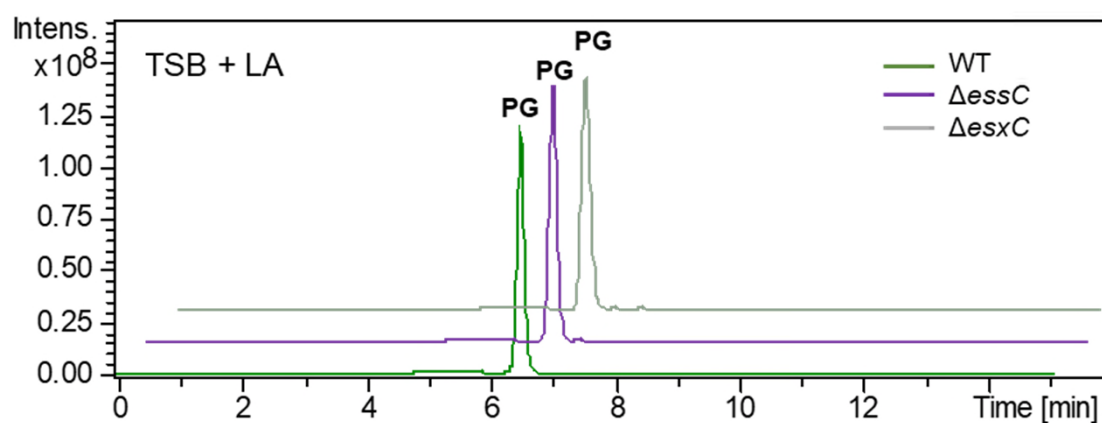

**Fig. S2**

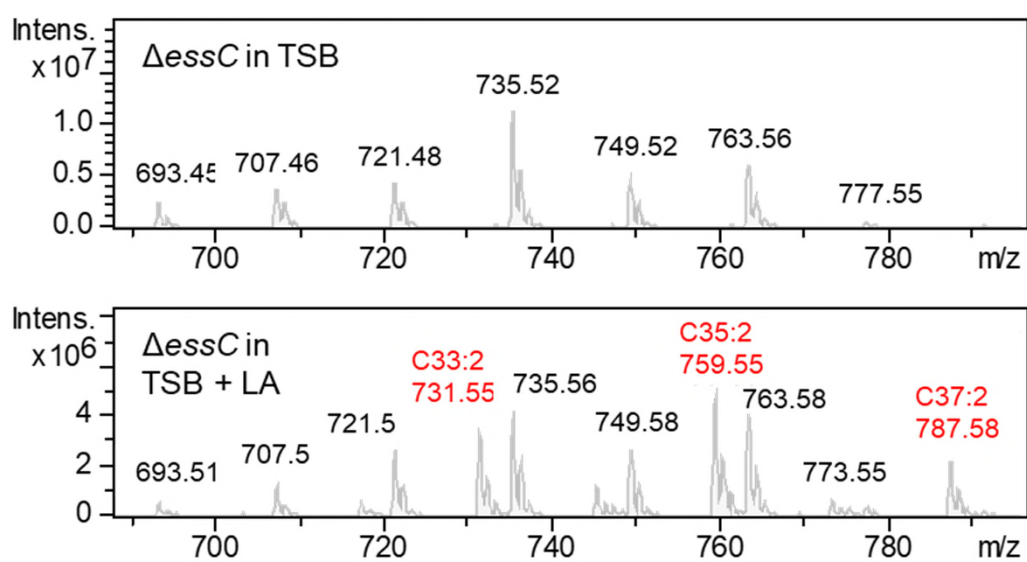

**Fig. S3**

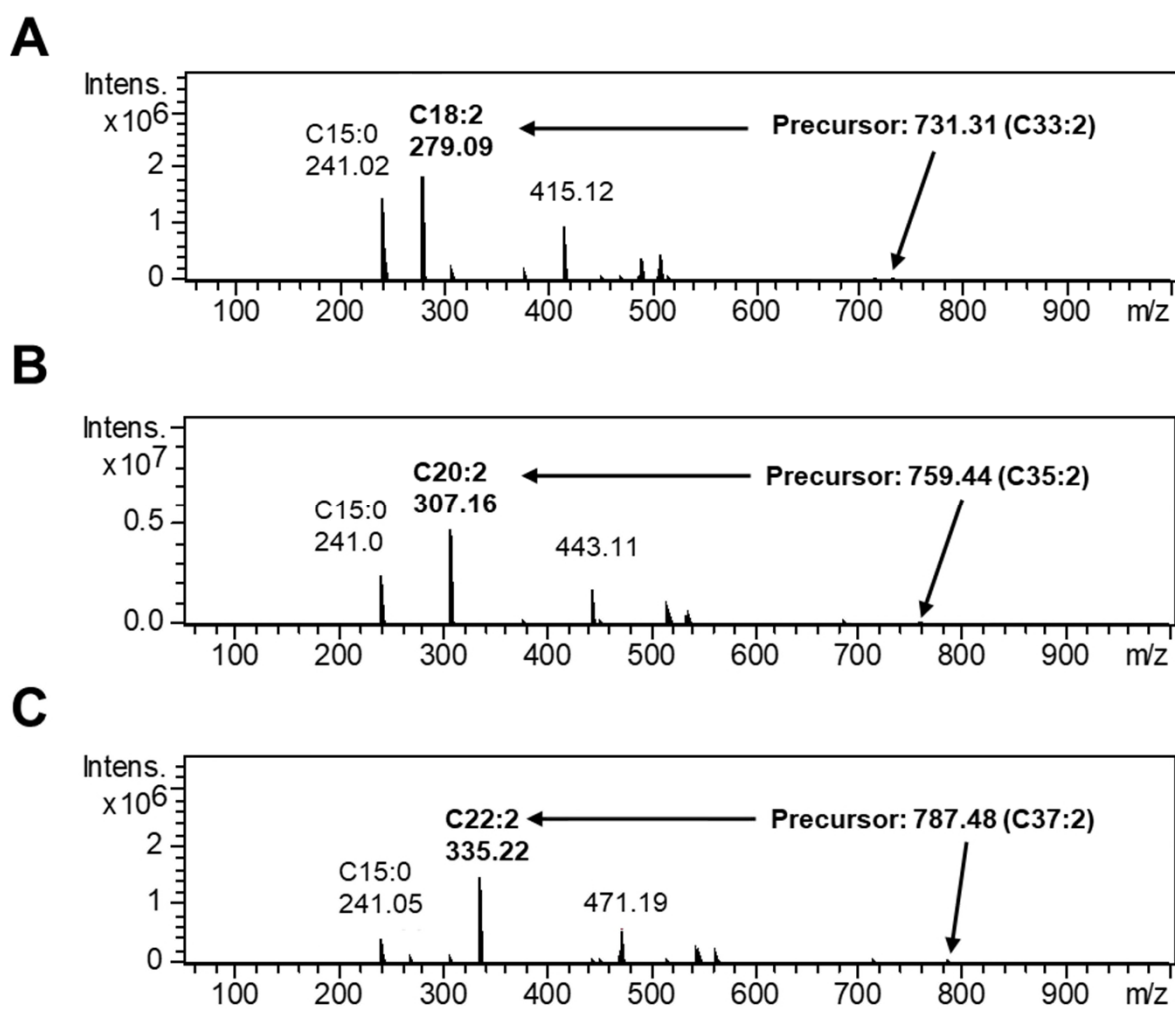

**Fig. S4**

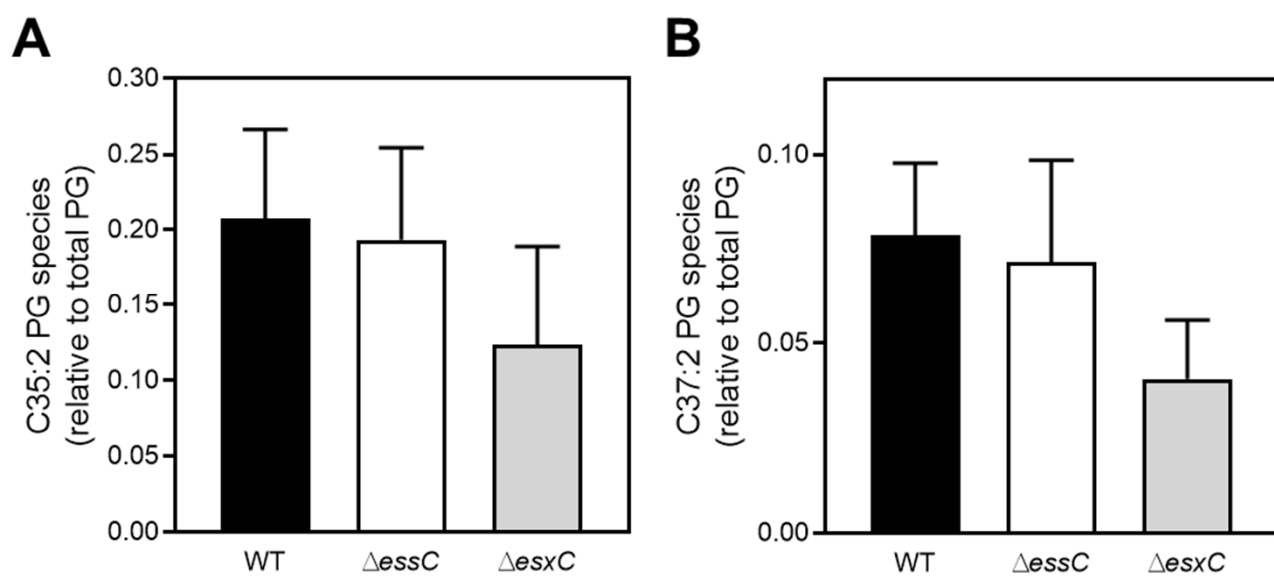

**Fig. S5**

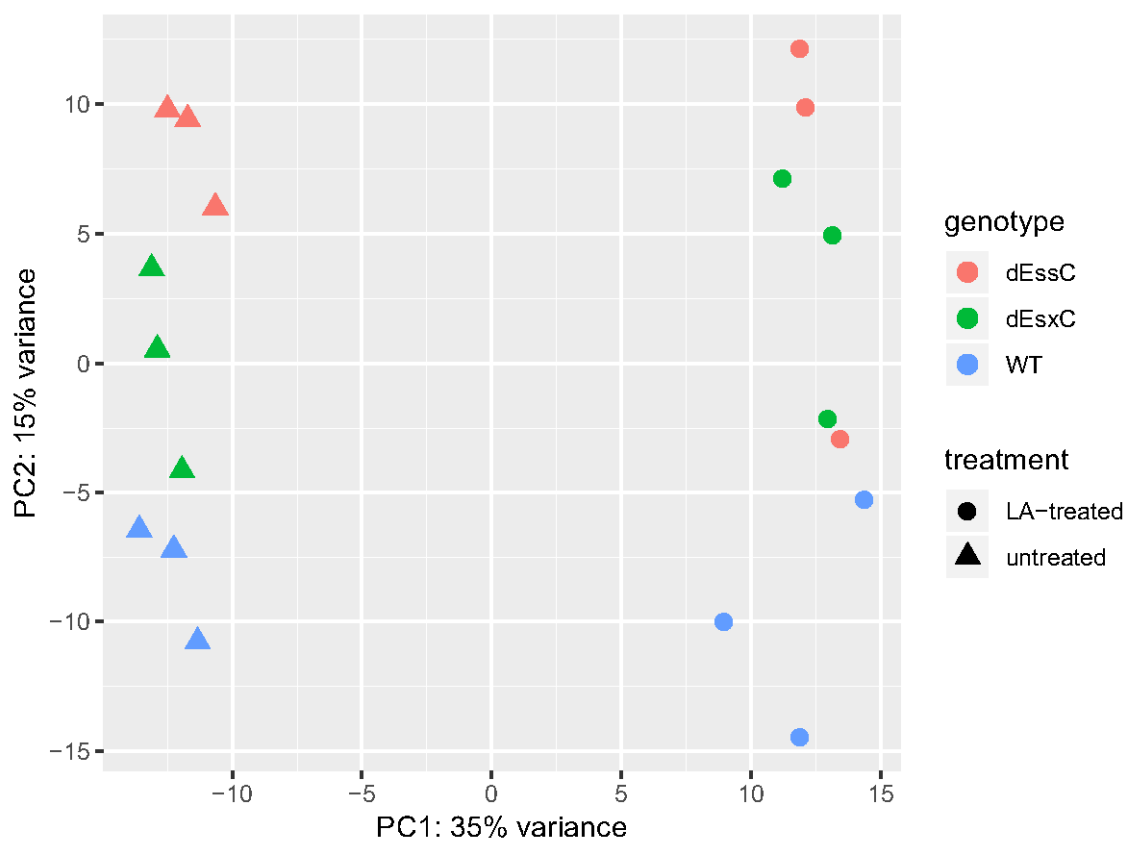

**Fig. S6**

**A**

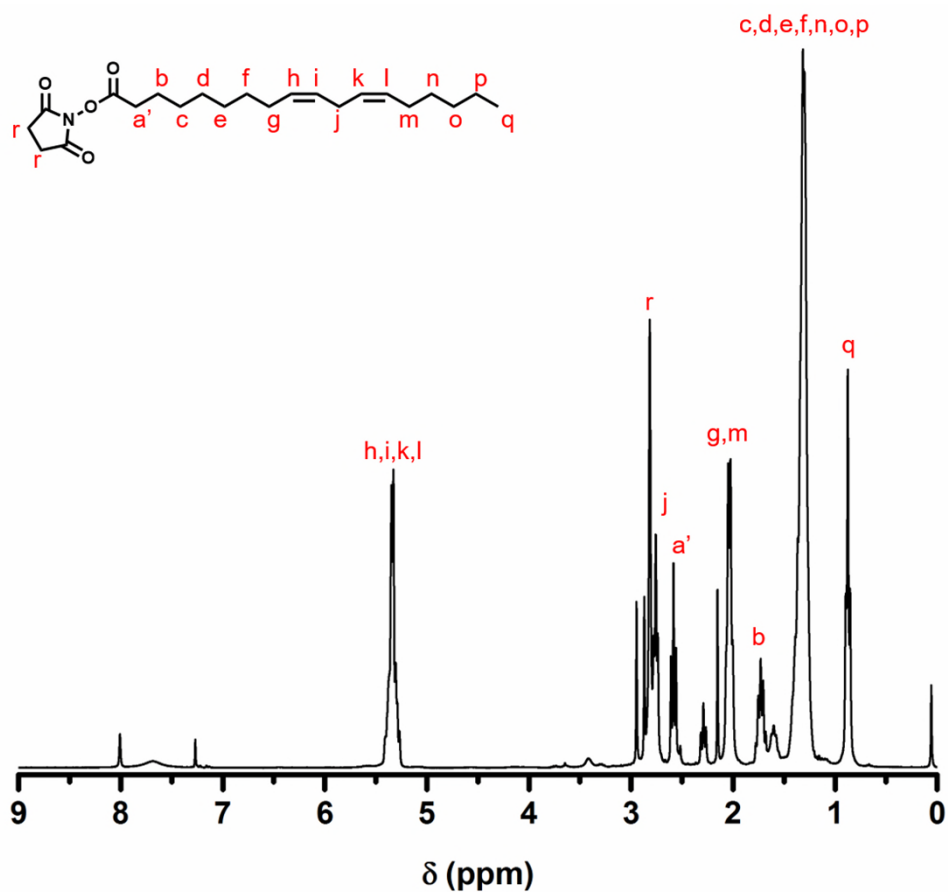

**B**

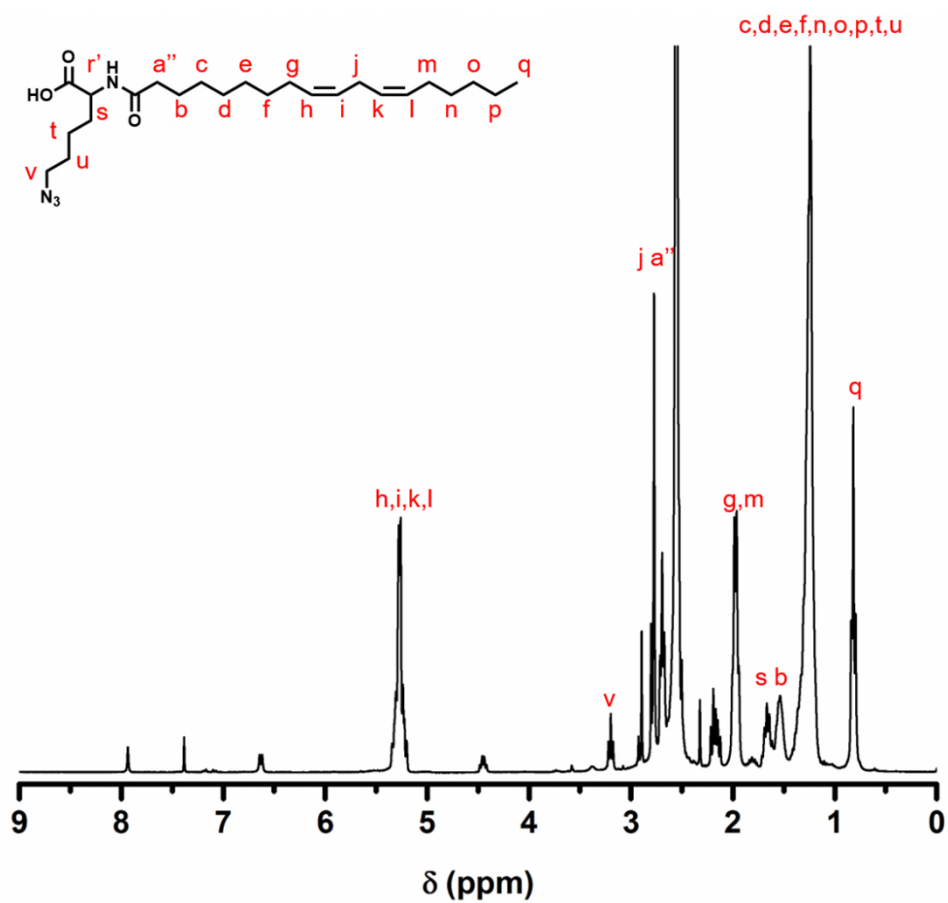

**Fig. S7**
