1 **The type VII secretion system protects *Staphylococcus aureus* against**  
2 **antimicrobial host fatty acids**

3 Arnaud Kengmo Tchoupa<sup>1</sup>, Kate E. Watkins<sup>1</sup>, Rebekah A. Jones<sup>1</sup>, Agnès Kuroki<sup>2</sup>,  
4 Mohammad Tauqeer Alam<sup>1</sup>, Sebastien Perrier<sup>1,2,3</sup>, Yin Chen<sup>4</sup>, Meera Unnikrishnan<sup>1\*</sup>

5 <sup>1</sup>Warwick Medical School, University of Warwick, Coventry, United Kingdom

6 <sup>2</sup>Department of Chemistry, University of Warwick, Coventry, United Kingdom

7 <sup>3</sup>Faculty of Pharmacy and Pharmaceutical Sciences, Monash University, Parkville,  
8 Victoria 3052, Australia

9 <sup>4</sup>School of Life Sciences, University of Warwick, Coventry, United Kingdom

10

11 Running title: *S. aureus* T7SS and fatty acid toxicity

12

13

14

15

16 \*Corresponding author

17 Email: M.Unnikrishnan@warwick.ac.uk.

## 18 **Summary**

19 The *Staphylococcus aureus* type VII secretion system (T7SS) exports several proteins  
20 that are pivotal for bacterial virulence. The mechanisms underlying T7SS-mediated  
21 staphylococcal survival during infection nevertheless remain unclear. Here we show  
22 that the absence of EsxC, a small secreted effector implicated in bacterial persistence,  
23 results in cell membrane defects in *S. aureus*. Interestingly, isogenic mutants lacking  
24 EsxC, other T7SS effectors EsxA and EsxB, or the membrane-bound ATPase EssC,  
25 are more sensitive to killing by the host-derived antimicrobial fatty acid, linoleic acid  
26 (LA), compared to the wild-type (WT). LA induces more cell membrane damage in the  
27 T7SS mutants compared to the WT. Although WT and mutant strains did not differ in  
28 their ability to bind labelled LA, membrane lipid profiles show that T7SS mutants are  
29 less able to incorporate LA into their membrane phospholipids. Furthermore,  
30 proteomic analyses of WT and mutant cell fractions reveal that, in addition to  
31 compromising membranes, T7SS defects induce oxidative stress and hamper their  
32 response to LA challenge. Thus, our findings indicate that T7SS is crucial for *S. aureus*  
33 membrane integrity and homeostasis, which is critical when bacteria encounter  
34 antimicrobial fatty acids.

35

36 **Keywords:** *Staphylococcus aureus*, Type VII secretion system, long-chain  
37 unsaturated free fatty acids.

38

39

40

## 41 **Introduction**

42 *Staphylococcus aureus* is a facultative pathogen that can colonize the skin and nares  
43 of healthy individuals. The asymptomatic carriage of *S. aureus* is a major risk for  
44 subsequent infections (von Eiff *et al.*, 2001). *S. aureus* infections, which can be  
45 healthcare or community-associated, range from benign impetigo to life-threatening  
46 bacteraemia (Tong *et al.*, 2015). Clinical management of staphylococcal infections is  
47 complicated by the increasing prevalence of multidrug resistant strains (Lee *et al.*,  
48 2018).

49 The success of *S. aureus* as a deadly pathogen is attributed to an array of virulence  
50 factors that facilitate host tissue adhesion and immune response evasion (Gordon &  
51 Lowy, 2008). One of these virulence factors is the type VII secretion system (T7SS),  
52 also known as the ESAT-6 secretion system (ESS). The orthologous ESX-1 system  
53 was initially discovered in *Mycobacterium tuberculosis*, where it is essential for  
54 bacterial virulence (Conrad *et al.*, 2017). T7SSs (T7SSb) are found in both Gram-  
55 positive and Gram-negative bacteria, although these systems and their secretion  
56 machineries appear to be distinct to their mycobacterial counterparts (Unnikrishnan *et*  
57 *al.*, 2017).

58 In extensively studied strains (COL, RN6390, USA300 and Newman), the T7SS  
59 consists of four integral membrane proteins (EsaA, EssA, EssB and EssC), two  
60 cytosolic proteins (EsaB and EsaG), five secreted substrates (EsxA, EsxB, EsxC,  
61 EsxD and EsaD), and EsaE, which interacts with the T7SS substrates to target them  
62 to the secretion apparatus (Cao *et al.*, 2016). A peptidoglycan hydrolase, EssH, was  
63 reported to mediate T7SS transport across the bacterial cell wall envelope  
64 (Bobrovskyy *et al.*, 2018).

65 The molecular architecture of the staphylococcal T7SS has not yet been fully  
66 characterized. T7SS integral membrane proteins EsaA, EssA, EssB, and EssC are  
67 thought to be the core of the T7 secretion machinery, with EssC being the central  
68 membrane transporter (Burts *et al.*, 2005, Jager *et al.*, 2018, Zoltner *et al.*, 2016).  
69 Interactions between secreted substrates and co-dependent secretion of substrates  
70 have been demonstrated (Anderson *et al.*, 2013, Cao *et al.*, 2016, Kneuper *et al.*,  
71 2014, Ohr *et al.*, 2017). A recent study showed that the functional assembly of the  
72 T7SS machinery in *S. aureus* is supported by the flotillin homolog FloA, within  
73 functional membrane microdomains (Mielich-Suss *et al.*, 2017).

74 The *S. aureus* T7SS is pivotal for bacterial virulence. Indeed, *S. aureus* mutants  
75 lacking the entire T7SS (Kneuper *et al.*, 2014) or specific T7SS components (EsxA,  
76 EssB, EssC, EsxC, EsxB, EsaB, EsaD or EsaE) were consistently shown to be less  
77 virulent and/or persistent in various mouse infection models (Anderson *et al.*, 2011,  
78 Anderson *et al.*, 2017, Burts *et al.*, 2008, Burts *et al.*, 2005, Ishii *et al.*, 2014, Lopez *et*  
79 *al.*, 2017). EsxA is necessary to delay apoptosis of *S. aureus*-infected epithelial and  
80 dendritic cells, while other substrates modulate cytokine production (Anderson *et al.*,  
81 2017, Cruciani *et al.*, 2017, Korea *et al.*, 2014). Although the relevance of T7SS to *S.*  
82 *aureus* is less understood, a role for the toxin-antitoxin pair EsaD (or EssD) and EsaG  
83 (or EssI) was recently demonstrated in intraspecies competition (Cao *et al.*, 2016, Ohr  
84 *et al.*, 2017).

85 Interestingly, *S. aureus* T7SS expression is induced in response to host-specific FAs  
86 (Ishii *et al.*, 2014, Kenny *et al.*, 2009, Lopez *et al.*, 2017), although the role of T7SS in  
87 bacterial resistance to antimicrobial FAs remains unclear. In this study, we  
88 demonstrate that *S. aureus* lacking the T7SS substrate EsxC has a defective cell  
89 membrane. Intriguingly, EsxC and other T7SS mutants were more sensitive to an

90 unsaturated FA, linoleic acid (LA), compared to the wild-type (WT). Although there  
91 were no differences in binding labelled LA, LA induced a more leaky membrane in the  
92 T7SS mutants, and there was less incorporation of LA into membrane phospholipids.  
93 Cellular proteomics revealed that in addition to membrane discrepancies, T7SS  
94 mutants exhibited different redox and metabolic states, which likely result in a distinct  
95 response to LA.

96

## 97 **Results**

### 98 **The type VII substrate EsxC is present on the staphylococcal surface and affects** 99 **its composition**

100 EsxC, a small 15-kDa protein secreted by the T7SS, is important for *S. aureus*  
101 persistence in mice (Burts *et al.*, 2008). However, mechanisms underlying EsxC- or  
102 T7SS-mediated bacterial survival are not known. In order to understand the role of  
103 EsxC, we generated an isogenic *esxC* mutant as described previously (Bae &  
104 Schneewind, 2006), and confirmed the absence of any secondary site mutations by  
105 whole genome sequencing.  $\Delta esxC$  had a similar growth rate to the WT USA300 JE2  
106 strain (Fig. S1). EsxC is known to be a secreted effector of T7SS (Burts *et al.*, 2008),  
107 although it has been consistently detected in cell membrane (CM) fractions of RN6390  
108 and USA300 (Bobrovskyy *et al.*, 2018, Kneuper *et al.*, 2014). As reported previously,  
109 we detected EsxC in the CM fractions of the WT but not in  $\Delta esxC$  (Fig. S2). Moreover,  
110 we also detected EsxC in the WT cell wall (CW) fraction (Fig. S2). In a deletion mutant  
111 of the membrane-bound major ATPase EssC (a core T7SS component), EsxC was  
112 detected in CM and CW preparations even in the absence of EssC (Fig. S2). While  
113 we were unable to detect EsxC in the cell-free supernatants by immunoblotting, we

114 detected this protein by secretome analyses. Along with EsxC, other T7SS proteins,  
115 EsxA and EsxD, were detected in the WT but not in  $\Delta$ esxC or  $\Delta$ essC supernatants  
116 (Table S1).

117 Given the association of EsxC with the cell membrane, we stained the WT,  $\Delta$ esxC and  
118  $\Delta$ essC mutants with FM-143, a fluorescent cell membrane probe (Pulschen *et al.*,  
119 2017). We observed a mild but statistically significant increase in FM-143 staining in  
120 the mutants as compared to the WT (Fig. 1A). Increased staining of membranes by  
121 FM-143 has been associated previously with membrane blebbing in bacteria (Wood  
122 *et al.*, 2019).

123 To study if the lack of T7SS proteins affected other surface proteins, a surface  
124 proteome analysis of the WT and mutants was carried out using trypsin treatment to  
125 digest surface proteins (Solis *et al.*, 2014). We found that most proteins (172/218) were  
126 less abundant in  $\Delta$ esxC compared to the WT (Fig. S3). Interestingly, majority of  
127 relatively less abundant proteins (16/20) in the  $\Delta$ esxC surface proteome were  
128 predicted or proven to be cytosolic (Table S2). Metabolic (PfkA, FOLD, FabI GatB, and  
129 ImdH) or stress-related (Asp23 and putative universal stress proteins) proteins were  
130 lowest in abundance ( $\log_2$  fold change  $< -1.0$ ). The T7SS core component EsaA, which  
131 has a prominent extracellular loop (Dreisbach *et al.*, 2010), was also ~50% less  
132 abundant in  $\Delta$ esxC, implying that EsxC absence may affect T7SS assembly.  
133 Identification of cytosolic proteins during surface proteome analysis could be attributed  
134 to non-canonical secretion of cytosolic proteins that bind to bacterial surfaces (Hempel  
135 *et al.*, 2011, Pasztor *et al.*, 2010) or cell lysis during sample preparation (Dreisbach *et al.*  
136 *et al.*, 2010, Solis *et al.*, 2014, Ventura *et al.*, 2010). To study if the T7SS mutants were  
137 more resistant to cell lysis, we compared the Triton X-100 lysis of WT,  $\Delta$ esxC and,

138  $\Delta$ essC in PBS in non-growing conditions. While  $\Delta$ esxC was slightly more resistant to  
139 Triton X-100,  $\Delta$ essC was clearly defective in lysis (Fig. 1B), as compared to the WT.

140 We probed T7SS effects on the membrane further by assessing membrane fluidity of  
141 the WT and  $\Delta$ esxC mutant. We used pyrene decanoic acid, an eximer-forming lipid  
142 (Lopez *et al.*, 2017), to measure the fluidity of WT and  $\Delta$ esxC membranes. Compared  
143 to the WT, the cytosolic membrane of the  $\Delta$ esxC mutant showed a mild but statistically  
144 significant increase in rigidity (Fig. 1C). Furthermore, we stained WT and with a  
145 fluorescent membrane dye Dil12C, which has been used detect regions of increased  
146 fluidity in bacteria (Saeloh *et al.*, 2018). As reported previously for *S. aureus*, we  
147 observe few fluid regions in the WT, and an uneven staining of the membrane. In  
148 contrast, a very weak staining of the membranes was observed for the  $\Delta$ esxC mutant,  
149 (Fig 1 D and E), which may indicate a decrease in membrane fluidity.

150 Overall, the data indicate that EsxC contributes to *S. aureus* cell surface structure and  
151 membrane fluidity.

152

### 153 ***S. aureus* esxC and essC mutants are more sensitive to antimicrobial fatty acids**

154 Multiple studies have reported the activation of the T7SS, when *S. aureus* is grown in  
155 presence of host FAs (Ishii *et al.*, 2014, Kenny *et al.*, 2009, Lopez *et al.*, 2017). Given  
156 our findings that the *esxC* mutant has membrane defects and that the *esxC* deletion  
157 affects the surface abundance of *IsdA*, which is essential for *S. aureus* resistance to  
158 antimicrobial fatty acids (Clarke *et al.*, 2007), we cultured WT USA300 and its isogenic  
159 *essC* or *esxC* mutant in the presence of an unsaturated FA (C18:2), linoleic acid (LA),  
160 at a concentration (80  $\mu$ M) that still allows WT growth. Bacteria were also cultured in  
161 parallel in presence of stearic acid (SA), a saturated C18:0 FA. The T7SS mutants

162 displayed impaired growth in presence of LA but not SA, as measured by optical  
163 density (OD) (Fig. 2A) or colony forming units (CFU) (Fig. 2B). Importantly,  $\Delta$ esxC  
164 complemented with a plasmid containing the esxC gene reverted to the WT phenotype  
165 (Fig. 2C). The increased susceptibility of T7SS mutants to antimicrobial fatty acids was  
166 not restricted to linoleic acid; when cultured in the presence of arachidonic acid,  
167 another unsaturated FA (C20:4), growth of  $\Delta$ esxC and  $\Delta$ essC were inhibited more as  
168 compared to the WT (Fig. S4)

169

### 170 **T7SS substrates contribute to *S. aureus* resistance to LA toxicity**

171 Next, we investigated whether T7SS proteins other than essC and esxC contributed  
172 to *S. aureus* growth in presence of LA. Mutants lacking two other substrates,  $\Delta$ esxA  
173 and  $\Delta$ esxB, were grown in presence of FAs. Both mutants grew slower than the WT  
174 USA300 (Fig. S5A). To ensure that the increased sensitivity observed for the T7SS  
175 mutants was not strain specific, RN6390  $\Delta$ essC or  $\Delta$ esxC and Newman  $\Delta$ esxA or  
176  $\Delta$ esxB mutants were tested. Similar to the USA300 mutants, the growth of all these  
177 T7SS mutants was also impacted in the presence of LA (Fig. S5B and C). The growth  
178 defect in Newman  $\Delta$ esxA was abrogated upon complementation (Fig. 2D). Of note,  
179 the Newman WT was readily inhibited by a lower concentration of LA (40  $\mu$ M), which  
180 is in agreement with the lower T7SS expression levels in this strain compared to  
181 USA300 (Anderson *et al.*, 2013, Kneuper *et al.*, 2014). We conclude that a functional  
182 T7SS plays a role in *S. aureus* resistance to LA toxicity.

183

### 184 **T7SS is required for maintaining membrane integrity in presence of LA**



185 To study the mechanisms involved in T7SS mediated protection to LA toxicity, further  
186 studies were performed using strains lacking *esxC*, a representative T7SS effector, or  
187 *essC* the main T7SS transporter. As our membrane and surface proteome analyses  
188 with  $\Delta$ *esxC* suggested that the bacterial envelope is altered upon T7SS defect, we  
189 wanted to test if LA-mediated growth inhibition was due to an increased binding of LA  
190 to T7SS mutants. To do this, we chemically engineered LA to produce an azide  
191 functionalised LA (*N*<sup>6</sup>-diazo-*N*<sup>2</sup>-((9Z,12Z)-octadeca-9,12-dienoyl)lysine, N<sub>3</sub>-LA) or  
192 azide-LA (Fig. 3A). After incubating bacteria with azide-LA, click-chemistry with an  
193 alkyne dye (Click-iT™ Alexa Fluor™ 488 sDIBO alkyne) was used to stain azide-LA  
194 associated with bacteria. There were no obvious differences in the fluorescence from  
195  $\Delta$ *essC* and  $\Delta$ *esxC* compared to the WT (Fig. 3B), suggesting that T7SS components  
196 are not involved in binding or sequestering LA. However, when bacteria treated with  
197 azide-LA were stained with propidium iodide (PI), a good indicator of membrane  
198 integrity,  $\Delta$ *essC* and  $\Delta$ *esxC* displayed a more intense PI staining compared to the WT  
199 (Fig. 3C and D). Similarly, when WT and mutants were stained with PI and SYTO 9  
200 after treatment with 80  $\mu$ M unlabelled LA, we observed an increased PI staining (Fig.  
201 4A and B) and therefore lower SYTO 9 / PI (Live/Dead) ratio for both mutants (Figure  
202 4C). These data suggest that an intact T7SS helps *S. aureus* to maintain its membrane  
203 integrity when faced with the detergent-like effects of unsaturated FAs.

204

### 205 **LA-incorporation into membrane phospholipids is modulated by T7SS**

206 As the T7SS mutants have more compromised cell membranes in presence of LA, we  
207 next investigated if membrane lipids were altered in the T7SS mutants. Lipids from  
208 WT USA300 and T7SS mutants were analysed by high-performance liquid

209 chromatography (HPLC)-mass spectrometry (MS) in negative ionisation mode. As  
210 reported previously (Delekta *et al.*, 2018, Parsons *et al.*, 2011), phosphatidylglycerol  
211 (PG) was the major phospholipid present in the membrane of WT grown in TSB (Fig.  
212 S6A).  $\Delta$ essC and  $\Delta$ esxC grown with or without 10  $\mu$ M LA [(a concentration that has  
213 been previously shown to be sub-inhibitory for USA300 (Lopez *et al.*, 2017)] displayed  
214 lipid profiles similar to that of WT (Fig. S6A and B). Notably, PG molecular species  
215 were significantly altered upon growth in LA-supplemented TSB for WT (Fig. 5A),  
216  $\Delta$ essC (Fig. S6C) and  $\Delta$ esxC (Fig. 5B). Three new LA-specific PG species with mass  
217 to charge ratios (m/z) 731 (C33:2), 759 (C35:2), and 787 (C37:2) appeared to contain  
218 LA (C18:2) or its elongated C20:2 or C22:2 versions, as revealed by their  
219 fragmentations (Fig. S7A, B and C). PG species containing exogenous, unsaturated  
220 FAs were also present in  $\Delta$ essC and  $\Delta$ esxC. However, LA (C18:2)-containing PG  
221 species (C33:2) were less abundant in the *esxC* mutant compared to WT (Fig. 5C). A  
222 similar trend, although statistically non-significant ( $P > 0.05$ ), was observed for C20:2-  
223 and C22:2-containing PG species (Fig. S7D and E), and when all the unsaturated  
224 exogenous PG species were combined (Fig. 5D). The data suggest that a T7SS defect  
225 may compromise the incorporation and elongation of LA in *S. aureus* membranes.

226

## 227 **T7SS mutations affect the total cellular content and *S. aureus* responses to LA**

228 In order to gain further insight into T7SS-mediated modulation of proteins involved in  
229 FA incorporation and membrane homeostasis in presence of LA, we used an unbiased  
230 proteomic approach to study protein profiles of WT USA300,  $\Delta$ essC, and  $\Delta$ esxC grown  
231 exponentially with or without 10  $\mu$ M LA. Of note, WT and both these T7SS mutants  
232 grew similarly in presence of up to 40  $\mu$ M LA (Fig. S8).

233 *WT vs T7SS mutants in absence of LA treatment:* Interestingly,  $\Delta$ essC or  $\Delta$ esxC  
234 cultured in TSB readily displayed proteins with changed abundance when compared  
235 to the WT, with 37 and 24 proteins significantly ( $P < 0.05$ ) altered in  $\Delta$ essC and  $\Delta$ esxC,  
236 respectively. Similarly, 14 proteins were differentially abundant in both  $\Delta$ essC and  
237  $\Delta$ esxC (Fig. 6A and B). These included proteins associated with signal transduction  
238 (LytR and ArlR), the CW (acetyltransferase GNAT, FnbB and MazF), DNA repair (MutL  
239 and RadA), nucleotide binding (ATP-grasp domain protein and YqeH), hydrolysis  
240 (amidohydrolase), cell stress response [universal stress protein (Usp) family], or were  
241 uncharacterised (A0A0H2XGJ8, YbbR and lipoprotein) (Fig. 6B and Table 1). Of the  
242 33 proteins changed only in  $\Delta$ essC (23 proteins) or  $\Delta$ esxC (10 proteins), nearly 40%  
243 (13 proteins) were associated with oxidation-reduction and other metabolic processes.  
244 Ten membrane proteins were more abundant in  $\Delta$ essC (Table 1), which included SrrB,  
245 a membrane protein that is activated by impaired respiration (Mashruwala *et al.*, 2017),  
246 and whose gene expression increased 6 times upon growth in presence of LA (Lopez  
247 *et al.*, 2017). SrrB was also detected at higher levels in the esxC mutant although the  
248 increase was non-significant ( $P = 0.07$ ).

249 **Table 1. Proteins with changed abundance in  $\Delta$ essC and  $\Delta$ esxC mutants relative to the WT**  
 250 **USA300 JE2**

| Functions                   | Uniprot ID | $\Delta$ essC/WT    |                  | $\Delta$ esxC/WT    |                  | Description                                                  |
|-----------------------------|------------|---------------------|------------------|---------------------|------------------|--------------------------------------------------------------|
|                             |            | Log <sub>2</sub> FC | Adjusted P value | Log <sub>2</sub> FC | Adjusted P value |                                                              |
| Signal transduction systems | Q2FK09     | -3.0                | 4.90E-13         | -3.1                | 4.90E-13         | Sensory transduction protein LytR                            |
|                             | Q2FH23     | -2.9                | 0.002527         | -2.1                | 0.026184         | Response regulator ArlR                                      |
| Membrane proteins           | A0A0H2XF42 | 3.0                 | 1.75E-10         | 0                   | 1                | Cytochrome D ubiquinol oxidase, subunit I                    |
|                             | A0A0H2XDZ5 | 1.7                 | 1.68E-05         | 0                   | 1                | Uncharacterized membrane protein                             |
|                             | A0A0H2XFJ8 | 2.0                 | 0.001077         | 0.5                 | 0.883953         | Uracil permease                                              |
|                             | A0A0H2XGW7 | 2.7                 | 0.005757         | 2.5                 | 0.010784         | Putative lipoprotein                                         |
|                             | A0A0H2XIA9 | 1.0                 | 0.006115         | 0                   | 1                | Protein translocase subunit SecY                             |
|                             | Q2FIN2     | 1.6                 | 0.029451         | 0.5                 | 0.970614         | Prolipoprotein diacylglycerol transferase LGT                |
|                             | A0A0H2XKD9 | 2.0                 | 0.038093         | 1.8                 | 0.070347         | Staphylococcal respiratory response protein SrrB             |
|                             | A0A0H2XFE1 | 3.4                 | 0.039814         | 1.1                 | 0.970614         | Peptidase                                                    |
|                             | A0A0H2XJV8 | 2.0                 | 0.04444          | 1.5                 | 0.231285         | Cyclic-di-AMP phosphodiesterase                              |
|                             | A0A0H2XGF4 | 3.0                 | 0.044681         | 0.9                 | 0.986458         | Sodium:dicarboxylate symporter family protein                |
| Stress response             | A0A0H2XHV2 | 2.5                 | 0.049168         | 2.4                 | 0.070182         | Glycine betaine transporter OpuD                             |
|                             | A0A0H2XKH6 | 2.2                 | 5.80E-05         | 2.5                 | 1.07E-05         | Universal stress protein family                              |
| DNA repair                  | A0A0H2XIZ0 | 0.0                 | 1                | -3.4                | 1.06E-10         | OsmC/Ohr family protein                                      |
|                             | Q2FHE2     | -2.3                | 1.79E-08         | -2.3                | 1.19E-08         | DNA mismatch repair protein MutL                             |
|                             | A0A0H2XI63 | -2.0                | 0.004036         | -2.0                | 0.004036         | DNA repair protein RadA                                      |
| Oxidation-reduction process | A0A0H2XHT1 | -0.3                | 0.708343         | -1.9                | 0.008379         | Formamidopyrimidine-DNA glycosylase MutM                     |
|                             | A0A0H2XJ90 | 1.1                 | 0.038093         | 1.0                 | 0.088334         | D-isomer specific 2-hydroxyacid dehydrogenase family protein |
|                             | A0A0H2XHE0 | 2.4                 | 0.039099         | -0.1                | 1                | Thiol-disulphide oxidoreductase, DCC family protein          |
|                             | A0A0H2XGR9 | 0.0                 | 1                | 1.4                 | 8.89E-08         | Oxidoreductase, Gfo/Idh/MocA family                          |
|                             | A0A0H2XK08 | 1.0                 | 0.406975         | 2.9                 | 0.00791          | Oxidoreductase, short chain dehydrogenase/reductase family   |
| Hydrolases                  | A0A0H2XFZ3 | -0.8                | 0.404225         | 2.1                 | 0.016405         | Nitroreductase family protein                                |
|                             | A0A0H2XE49 | 2.9                 | 1.07E-06         | 2.9                 | 5.99E-07         | Amidohydrolase                                               |
|                             | Q2FES9     | -2.7                | 0.003385         | -0.3                | 1                | Uncharacterized hydrolase                                    |
|                             | A0A0H2XFF2 | -0.8                | 0.016697         | -0.5                | 0.157809         | Peptidase, U32 family                                        |
|                             | A0A0H2XJH8 | 0.0                 | 1                | 2.8                 | 1.06E-10         | Peptidase M20 domain-containing protein 2                    |
|                             | A0A0H2XJ54 | 0.0                 | 1                | 2.0                 | 0.000949         | Hydrolase (HAD superfamily)                                  |
| Metabolism                  | Q2FEG2     | -0.2                | 0.854748         | -2.9                | 0.004615         | Formimidoylglutamase                                         |
|                             | A0A0H2XGU2 | -1.6                | 4.99E-06         | -0.1                | 1                | Pseudouridine synthase                                       |
|                             | A0A0H2XK15 | 2.8                 | 0.004424         | 0.9                 | 0.777138         | 1-phosphatidylinositol phosphodiesterase                     |
|                             | Q2FEK2     | -1.6                | 0.038093         | -0.3                | 1                | Urease accessory protein UreE                                |
|                             | Q2FI05     | 1.1                 | 0.038093         | 0.0                 | 1                | Bifunctional purine biosynthesis protein PurH                |
|                             | Q2FIL2     | 2.9                 | 0.038093         | 0.8                 | 0.970614         | SsrA-binding protein                                         |
|                             | A0A0H2XI16 | 1.8                 | 0.038093         | 1.5                 | 0.088334         | Orn/Lys/Arg decarboxylase                                    |
| Cell wall composition       | A0A0H2XJR8 | -0.9                | 0.04444          | -0.5                | 0.61246          | RNA methyltransferase, RsmD family                           |
|                             | A0A0H2XKG7 | 0.0                 | 1                | 1.4                 | 8.18E-08         | Aspartokinase                                                |
|                             | A0A0H2XJQ4 | -4.0                | 4.92E-11         | -4.0                | 3.28E-11         | Acetyltransferase, GNAT family                               |
|                             | A0A0H2XKG3 | -2.3                | 0.001238         | -1.7                | 0.016405         | Fibronectin binding protein B                                |
| Nucleotide binding          | A0A0H2XJC8 | -2.3                | 0.009779         | -3.0                | 0.000819         | Phi77 ORF017-like protein (Toxin MazF)                       |
|                             | Q2FE03     | 0.0                 | 1                | 2.6                 | 1.18E-12         | Fibronectin-binding protein A                                |
| Uncharacterised proteins    | A0A0H2XHY5 | -2.3                | 8.58E-06         | -2.3                | 6.01E-06         | ATP-grasp domain protein                                     |
|                             | A0A0H2XFA5 | 3.3                 | 0.014259         | 3.5                 | 0.008379         | Putative GTP-binding YqeH protein                            |
|                             | A0A0H2XGJ8 | 2.2                 | 0.000372         | 2.4                 | 9.41E-05         | Uncharacterized protein                                      |
|                             | A0A0H2XE09 | 2.1                 | 0.008231         | 1.9                 | 0.016405         | Ybbr-like uncharacterized protein                            |
|                             | Q2FFI4     | 3.4                 | 0.020136         | 0.9                 | 0.970614         | UPF0316 membrane protein                                     |
|                             | A0A0H2XG24 | 1.1                 | 0.022345         | 0.8                 | 0.088334         | Uncharacterized protein                                      |

251 *WT vs T7SS mutants in presence of LA:* We then compared the proteomic profiles of  
252 LA-treated strains (WT,  $\Delta$ essC or  $\Delta$ esxC) with their untreated counterparts. Clearly,  
253 the principal component analysis revealed that the differences due to the genetic  
254 makeup (WT or T7SS mutants) were less prominent than the dramatic changes  
255 induced by LA (Fig. S9). These changes are exemplified for the WT; 163/1132 proteins  
256 identified had an altered relative abundance upon growth with LA (Fig. 6C). 167 and  
257 171 proteins were changed ( $P < 0.05$ ) in  $\Delta$ essC and  $\Delta$ esxC, respectively, in response  
258 to LA, of which ~ 40% (68 proteins) were common to these mutants and their WT (Fig.  
259 6D). At least 30% of the significantly changed proteins ( $P < 0.05$ ) were unique to WT  
260 (53 proteins),  $\Delta$ essC (50 proteins), or  $\Delta$ esxC (64 proteins) (Fig. 6D), suggesting that  
261 each strain responds differently to LA. However, almost all proteins (13/14 proteins)  
262 that were similarly deregulated in  $\Delta$ essC and  $\Delta$ esxC grown without LA (Fig. 6B) were  
263 modulated in presence of LA (highlighted in bold in Dataset S1). Proteins that were  
264 less abundant in both mutants were, upon LA treatment, either increased to WT levels  
265 (MutL, acetyltransferase GNAT, Toxin MazF, and ATP-grasp domain protein), or were  
266 unchanged in the mutants and decreased in the LA-treated WT (LytR and FnbB)  
267 (Dataset S1). Likewise, proteins with increased amounts in  $\Delta$ essC or  $\Delta$ esxC were: (i)  
268 downregulated to WT levels in response to LA (putative lipoprotein A0A0H2XGW7),  
269 (ii) unaltered in both mutants and upregulated in WT (Usp, amidohydrolase, and  
270 YbbR), (iii) or further increased in the *essC* mutant and strongly upregulated in WT  
271 (A0A0H2XGJ8) (Dataset S1). In sum, except for ArlR and RadA that were conversely  
272 regulated in all strains after LA treatment, proteins similarly deregulated in  $\Delta$ esxC and  
273  $\Delta$ essC were returned to similar levels in response to LA. A similar trend was observed  
274 for 15/23 and all 10 proteins exclusively more or less abundant in  $\Delta$ essC and  $\Delta$ esxC,  
275 respectively.

276 *Altered molecular functions in presence of LA:* We then used QuickGO (a web-based  
277 tool for Gene Ontology searching) (Binns *et al.*, 2009) to retrieve GO terms associated  
278 with the ten most significantly upregulated proteins in LA-treated WT (Dataset S1).  
279 Strikingly, 9/10 proteins had a hydrolase or an oxidoreductase activity. A  
280 comprehensive, statistical analysis showed a clear enrichment of 8 specific molecular  
281 functions ( $P < 0.05$ ) in at least one strain (WT or T7SS mutants) (Fig. 7A).  
282 Oxidoreductase and hydrolase activities were enhanced in LA-treated WT, while  
283  $\Delta$ essC and  $\Delta$ esxC were less able to upregulate proteins with these molecular  
284 functions. Flavin adenine dinucleotide (FAD)-binding, which plays a role in oxidation-  
285 reduction and FA metabolic processes, was similarly more enriched in the LA-treated  
286 WT. In contrast, transferase activity, which is linked to CW synthesis, was induced  
287 more in T7SS mutants compared to the WT. Molecular functions that are decreased  
288 upon LA challenge were also determined (Fig. 7B). In agreement with reduced  
289 intracellular ATP levels following membrane damage by antimicrobial FAs (Cartron *et*  
290 *al.*, 2014), genes with the ATP-binding function (mainly ATP-binding ABC transporters)  
291 were strongly inhibited in the WT. ATP-dependent lyases were also repressed in the  
292 WT. On the contrary, T7SS mutants were less able to modulate ATP-binding proteins.  
293 Instead, a strong inhibition of ribosomal constituents and other translation-related  
294 components was seen (Fig. 7B).

295 To test the oxidoreductive states of the WT and the mutants, we stained bacteria with  
296 dichlorofluorescein (DCF), which detects reactive oxygen species (George *et al.*, 2019).  
297 Reflecting the changes seen in the proteomics data, when treated with 10  $\mu$ M LA there  
298 is an increase in the ROS generated in the T7SS mutants compared to the WT (Fig  
299 7C). However, in bacteria grown without LA, the mutants have slightly less or no  
300 change in the ROS generated compared to WT (Figure 7D). Taken together, our

301 proteomic analyses reveal that the lack of T7SS induces altered membrane and  
302 metabolic states indicative of oxidative stress responses. While the WT shows a  
303 multifaceted response to mitigate LA-induced damage on the bacterial membrane,  
304 such responses are clearly altered in the absence of the T7SS.

305

## 306 **Discussion**

307 Host fatty acids (FAs) play a crucial role in the host defence to *S. aureus* infections. *S.*  
308 *aureus* is particularly sensitive to unsaturated FAs, which are abundant in the human  
309 skin (Clarke *et al.*, 2007, Parsons *et al.*, 2012, Arsic *et al.*, 2012, Kelsey *et al.*, 2006,  
310 Kenny *et al.*, 2009). We report here that the T7SS, an important component of *S.*  
311 *aureus* virulence arsenal, is critical in modulating the response to antimicrobial host  
312 FAs by maintaining the bacterial cell membrane integrity. Specifically, we demonstrate  
313 that a T7SS substrate, EsxC, impacts *S. aureus* membrane properties. A functional  
314 T7SS enables bacteria to mitigate LA-induced toxicity and grow better than mutants  
315 with a compromised T7SS. In the absence of T7SS components, LA is less  
316 incorporated into membrane phospholipids and enhances cell membrane damage,  
317 while bacteria are unable to activate adaptive mechanisms involved in LA resistance,  
318 as indicated by cellular proteomics.

319 Although several studies have shown multiple interactions between the staphylococcal  
320 T7SS components, the precise molecular architecture of this system remains unclear.  
321 EsxC (previously EsaC) was first described as a secreted protein (Burts *et al.*, 2008).  
322 However, in keeping with prior studies, we found that EsxC can also localize within  
323 staphylococcal membranes (Bobrovskyy *et al.*, 2018, Kneuper *et al.*, 2014). Based on  
324 available data, EsxC is likely to be associated to EsxA, EsaD, or EsaE on the

325 membrane (Anderson *et al.*, 2013, Anderson *et al.*, 2017, Cao *et al.*, 2016).  
326 Additionally, the reduced EsaA protein levels that we found on the surface of *S. aureus*  
327 USA300  $\Delta$ esxC combined with prior observations of diminished EsxC protein levels in  
328 RN6390  $\Delta$ esaA membranes (Kneuper *et al.*, 2014) suggest that EsxC may interact  
329 with EsaA, a key component of the T7SS core (Aly *et al.*, 2017), in *S. aureus*  
330 membranes.

331 T7SS integral membrane proteins interact with the flotillin homolog FloA within  
332 functional membrane microdomains (FMMs) (Mielich-Suss *et al.*, 2017). FMMs were  
333 recently shown to contain staphyloxanthin derivatives (Garcia-Fernandez *et al.*, 2017),  
334 which are known to increase membrane rigidity (Chamberlain *et al.*, 1991, Sen *et al.*,  
335 2016, Tiwari *et al.*, 2018). Hence, well-structured FMMs may play a role in *S. aureus*  
336 membrane fluidity as reported for *Bacillus subtilis* (Bach & Bramkamp, 2013).  
337 Interestingly, mutations or treatments affecting *S. aureus* membrane fluidity also  
338 modulate T7SS transcription (Lopez *et al.*, 2017, Ishii *et al.*, 2014, Parsons *et al.*,  
339 2014). Hence, there appears to be a link between membrane fluidity and T7SS in *S.*  
340 *aureus*. Also, the state of the membrane was suggested to trigger the production of  
341 T7SS (Lopez *et al.*, 2017). Remarkably, deletion of esxC led to a mild increase in  
342 bacterial membrane rigidity and membrane defects (Fig. 1), suggesting membrane  
343 modulation by the T7SS. Possibly, interactions between FloA and T7SS are perturbed  
344 upon esxC deletion and affect *S. aureus* FMMs. We surmise that a functional T7SS  
345 helps *S. aureus* to maintain its membrane architecture.

346 The current cellular proteomics data reveal that the abundance of more proteins is  
347 altered in  $\Delta$ essC (37) than esxC (24) in comparison to *S. aureus* WT, which is in  
348 keeping with the greater importance of EssC as the conserved driving force of the  
349 T7SS (Warne *et al.*, 2016). Importantly, almost 60% of proteins deregulated in  $\Delta$ esxC



350 are similarly affected in  $\Delta$ essC, strongly suggesting that any modification of the T7SS  
351 core leads to a similar staphylococcal response. Surprisingly, proteins with altered  
352 abundance in USA300  $\Delta$ essC were distinct to the ferric uptake regulator (Fur)-  
353 controlled genes differentially expressed in RN6390  $\Delta$ essC (Casabona *et al.*, 2017b).  
354 This discrepancy might be due to strain differences, including *rsbU* defect in RN6390  
355 that impairs SigB activity (Cassat *et al.*, 2006, Giachino *et al.*, 2001). Nevertheless,  
356 given the known role of Fur in oxidative stress resistance (Horsburgh *et al.*, 2001,  
357 Johnson *et al.*, 2011), both mutants may display an altered oxidative status following  
358 *essC* deletion. *S. aureus* RN6390 also differentially expresses redox-sensitive genes  
359 in absence of *EsaB* (Casabona *et al.*, 2017a). Also, since the T7SS substrate *EsxA* is  
360 upregulated in response to hydrogen peroxide (Casabona *et al.*, 2017b), one could  
361 speculate that lack of T7SS stimulates an oxidative stress response. A further  
362 indication of altered physiological states of  $\Delta$ essC and  $\Delta$ esxC was the decreased  
363 abundance of the two-component regulatory system proteins, *LytSR*, *ArlSR* and  
364 *SrrAB*, which was consistent with down-regulation of *lytR* transcription observed  
365 previously in the absence of *arlR* (Liang *et al.*, 2005). Importantly, the *S. aureus*  
366 response to antimicrobial FAs includes downregulation of *lytRS* (Kenny *et al.*, 2009,  
367 Neumann *et al.*, 2015), and upregulation of *srrB* (Lopez *et al.*, 2017). Given that *LytSR*  
368 is involved in bacterial surface and membrane potential modulation (Patton *et al.*,  
369 2006, Groicher *et al.*, 2000), T7SS defects are likely to result in an altered cell  
370 envelope.

371 It is striking that the staphylococcal T7SS is strongly upregulated in presence of sub-  
372 inhibitory concentrations of LA (Kenny *et al.*, 2009, Lopez *et al.*, 2017). FAs with more  
373 *cis* double bonds, which are more toxic toward *S. aureus* (Parsons *et al.*, 2012), are  
374 also more potent T7SS activators (Lopez *et al.*, 2017). Our current study interestingly

375 suggests a protective role of T7SS against LA toxicity. Previously described *S. aureus*  
376 antimicrobial FA (AFA) resistance mechanisms, including IsdA or wall teichoic acid-  
377 mediated modulation of cellular hydrophobicity (Clarke *et al.*, 2007, Kohler *et al.*, 2009,  
378 Parsons *et al.*, 2012, Moran *et al.*, 2017), and AFA detoxification with the efflux pumps  
379 Tet38 and FarE (Alnaseri *et al.*, 2015, Truong-Bolduc *et al.*, 2014), do not appear to  
380 explain the increased susceptibility of T7SS mutants to LA, as indicated by cellular  
381 proteomics. In line with a role for T7SS in the oxidative stress response, T7SS mutants  
382 were less able to prime their redox-active proteins in response to LA-induced oxidative  
383 stress. Instead, to cope with LA, they appear to rely on strong inhibition of the protein  
384 synthesis machinery, which is reminiscent of the stringent response (Geiger *et al.*,  
385 2012).

386 The Fak pathway which is required for incorporation of exogenous FA into membrane  
387 phospholipids via a two-component fatty acid kinase (Fak) (Nguyen *et al.*, 2016,  
388 Parsons *et al.*, 2012, Parsons *et al.*, 2014), was reported to be important for T7SS  
389 activation by unsaturated FA (Lopez *et al.*, 2017). FakB1 and FakB2, bind to FAs, and  
390 FakB-bound FAs are phosphorylated by FakA prior to their incorporation (Parsons *et*  
391 *al.*, 2014). In presence of inhibitory concentrations of unsaturated FA like LA, while FA  
392 is incorporated into the membrane lipids, free LA causes pore formation that leads to  
393 bacterial lysis (Greenway & Dyke, 1979). Our lipidomic analyses revealed that in the  
394 absence of T7SS, bacteria were less able to incorporate LA into their phospholipids  
395 (Figure 5), and displayed an increased membrane permeability in presence of LA.  
396 However, it seems counterintuitive that LA incorporation was impacted more in  $\Delta$ esxC  
397 than in  $\Delta$ essC given the central role of EssC in T7 secretion (Burts *et al.*, 2005, Jager  
398 *et al.*, 2018, Zoltner *et al.*, 2016). It is possible that EsxC that accumulates in the  
399 membrane (Fig. 1A) in the absence of protein secretion by the main transporter, EssC,

400 mediates partial LA incorporation in the *essC* mutant; secretion per se may not be  
401 required for LA incorporation. It is also worth noting that transcript levels of *esxC*, and  
402 not *essC*, were strongly upregulated in a *S. aureus fakA* mutant (Parsons *et al.*, 2014).  
403 As protein levels of Fak proteins in the T7SS mutants stay unaltered in presence or  
404 absence of LA, suggesting no T7SS-mediated regulatory control of the Fak pathway,  
405 we speculate that EsxC and other interdependent T7SS substrates play an important  
406 role in facilitating Fak function in *S. aureus* membranes, either by mediating  
407 recruitment or targeting of Fak proteins to the membrane. Our findings warrant further  
408 investigations into molecular mechanisms underlying T7SS-mediated FA  
409 incorporation within staphylococcal membranes.

410 The increased susceptibility of T7SS mutants to LA might explain why they are less  
411 virulent in environments rich in LA and other AFAs like the mouse lungs ( $\Delta$ *essC*) (Ishii  
412 *et al.*, 2014), abscesses ( $\Delta$ *esxC* and  $\Delta$ *esaB*), liver and skin ( $\Delta$ *essB*) (Wang *et al.*, 2016,  
413 Lopez *et al.*, 2017). Previous research showing T7SS induction by host-derived FAs  
414 further supports the importance of T7SS in such environments (Lopez *et al.*, 2017,  
415 Ishii *et al.*, 2014). Taken together, we conclude that T7SS plays a key role in  
416 modulating the *S. aureus* cell membrane in response to toxic host FAs. Although, at  
417 present, it is unclear how T7SS contributes to staphylococcal membrane architecture,  
418 T7SS interaction with the flotillin homolog FloA within functional membrane  
419 microdomains (Mielich-Suss *et al.*, 2017) corroborates the idea that T7SS proteins  
420 interact with many other proteins to modulate *S. aureus* membranes. Indeed, our data  
421 also suggest that blocking T7SS activity would make *S. aureus* more vulnerable to  
422 AFAs, a key anti-staphylococcal host defence, thus making T7SS a very attractive  
423 drug target.

424 **Experimental procedures:**

425 **Bacterial strains and growth conditions.** *S. aureus* strains used are listed in Table  
426 S3, and were grown aerobically in tryptic soy broth (TSB) overnight (O/N) at 37°C for  
427 each experiment unless stated otherwise. For complemented *S. aureus* strains, TSB  
428 was supplemented with 10 µg/mL chloramphenicol.

429 **Construction of bacterial mutants.** The primers used are listed in Table S4. In-frame  
430 deletion of *essC* or *esxC* was performed as described previously (Bae & Schneewind,  
431 2006). Briefly, 1-kb DNA fragments up and downstream of the targeted gene sequence  
432 were PCR-amplified from USA300 LAC JE2 chromosomal DNA, and both PCR  
433 products fused via SOEing (splicing by overlap extension)-PCR. The 2-kb DNA  
434 fragment obtained was cloned into pKORI, and used for in-frame deletion. Putative  
435 mutants were screened by PCR-amplification of a fragment including the gene of  
436 interest, whose deletion was confirmed by Sanger sequencing. Further, to confirm that  
437 successful mutants did not have any additional mutations, Illumina whole genome  
438 sequencing was performed on libraries prepared with the Nextera XT kit and an  
439 Illumina MiSeq® instrument following manufacturers' recommendations. For  
440 complementation, full-length *esxC* gene was cloned onto pOS1CK described  
441 previously (Korea *et al.*, 2014).

442 **Membrane fluidity assay.** O/N bacterial cultures were diluted to an OD<sub>600</sub> of 0.15 in  
443 TSB, and were grown to an OD<sub>600</sub> of 1 (OD1). Bacteria were washed with PBS prior  
444 to treatment for 30 min at 37°C with 37.5 µg/mL lysostaphin in PBS containing 20%  
445 sucrose. The spheroblasts were then centrifuged at 8000 × *g* for 10 min, and the pellet  
446 resuspended in the labelling solution (PBS, 20% sucrose, 0.01% F-127, 5 µM pyrene  
447 decanoic acid). The incubation in the dark was done for 1h at 25°C under gentle  
448 rotation. PBS supplemented with 20% sucrose was used to wash the stained

449 spheroblasts that were afterwards transferred to 96-well plates for fluorescence  
450 measurements as previously described (Lopez *et al.*, 2017).

451 **Triton X-100 lysis assays.** Whole cell autolysis assays were performed as described  
452 elsewhere with a few modifications (Mashruwala *et al.*, 2017). Specifically, OD1-grown  
453 *S. aureus* USA300 JE2 WT, *essC* and *esxC* mutants were extensively washed with  
454 PBS followed by ice-cold water, and resuspended in PBS with 0.1% Triton X-100 to  
455 an OD<sub>600</sub> of 0.7. Subsequently, the samples were incubated with shaking at 37°C for  
456 2h, after which bacteria were diluted with PBS and plated for CFU determination.

457 **FM1-43 staining.** *S. aureus* WT and mutant strains grown to OD<sub>600</sub> of 1.0 were  
458 centrifuged, and pellets were resuspended in PBS supplemented with 1 µg/mL FM1-  
459 43 (Invitrogen). After incubation for 15 min in the dark at 37°C with shaking, cells were  
460 washed once with PBS. Fluorescence was quantified using a FLUOstar OMEGA plate  
461 reader (BMG Labtech, UK) at excitation and emission wavelengths of 482 nm and 620  
462 nm, respectively.

463 **DilC12 staining.** O/N bacterial cultures were diluted to an OD<sub>600</sub> of 0.15 in TSB with  
464 1 µg/mL 1,1'-didodecyl-3,3',3'-tetramethylindocarbocyanine perchlorate (DilC12)  
465 (Invitrogen). Cultures were grown to an OD<sub>600</sub> of 1.0, centrifuged and washed twice  
466 with fresh TSB. Samples were spotted on to agarose pads and imaged using a Leica  
467 DMI8 widefield microscope (Leica Microsystems, UK). Acquired images were  
468 analysed with the ImageJ processing package, Fiji.

469 **Growth curves.** O/N bacterial cultures were diluted to an OD<sub>600</sub> of 0.05 in plain TSB  
470 or TSB supplemented with fatty acids. Bacteria were then grown in a 96-well plate with  
471 shaking, and the OD<sub>600</sub> was measured every 15 mins with a FLUOstar OMEGA plate  
472 reader (BMG Labtech, UK).

473 **Synthesis of azide functionalized linoleic acid.** A 2-step synthesis was used to  
474 obtain *N*<sup>6</sup>-diazo-*N*<sup>2</sup>-((9*Z*,12*Z*)-octadeca-9,12-dienoyl)lysine, N<sub>3</sub>-LA (azide-LA). LA was  
475 first functionalized with *N*-hydroxysuccinimide (NHS) in anhydrous dimethyl  
476 formamide (DMF) in presence of *N*-(3-dimethylaminopropyl)-*N*'-ethylcarbodiimide  
477 hydrochloride. The solvent was then removed and replaced by dichloromethane  
478 (DCM), following which the reaction mixture was washed with water and dried over  
479 magnesium sulphate. The product, 2,5-dioxopyrrolidin-1-yl (9*Z*,12*Z*)-octadeca-9,12-  
480 dienoate (NHS-LA), was analysed using <sup>1</sup>H nuclear magnetic resonance (NMR)  
481 spectroscopy (Fig. S10A) and mass spectrometry (MS). MS: [M+Na]<sup>+</sup> 400.5  
482 (calculated), 400.5 (found).

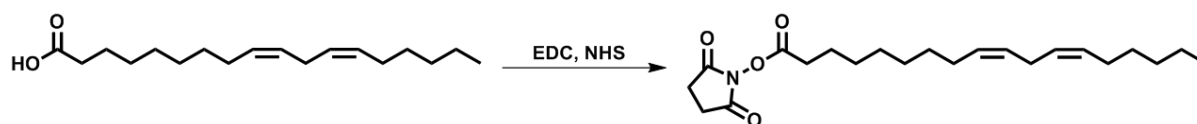

484 NHS-LA was left O/N at room temperature (RT) to react with L-azidolysine  
485 hydrochloride in anhydrous DMF, and produce azide-LA.

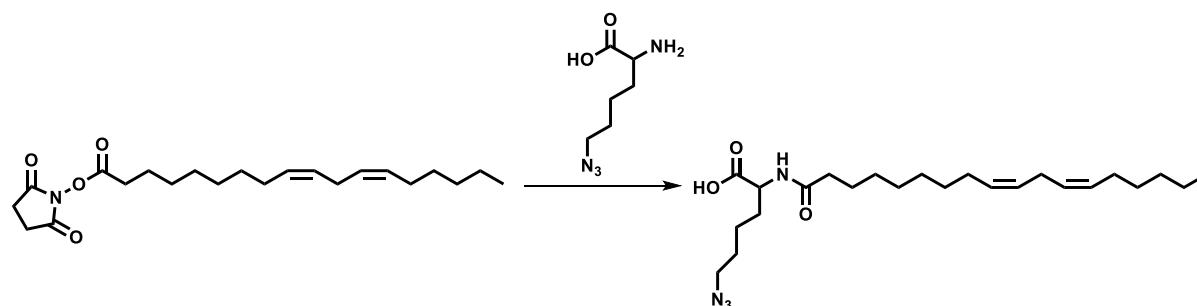

487 DMF was then removed, the reaction mixture precipitated in water, and dried under  
488 vacuum to obtain a clear oil. The composition of the oil was confirmed as being a  
489 mixture of azide-LA and unmodified LA (20% and 80%, respectively) based on <sup>1</sup>H  
490 NMR (Fig. S10B) and MS data. MS: [LA-H]<sup>-</sup> 279.5 (calculated), 279.2 (found), [M-H]<sup>-</sup>  
491 433.3 (calculated), 433.6 (found).

492 **Binding assays with azide-LA and click chemistry.** *S. aureus* USA300 JE2 WT,  
493  $\Delta$ essC, and  $\Delta$ esxC, grown to OD1, were treated with 10  $\mu$ M azide-LA for 15 min at  
494 37°C with shaking. The samples were then centrifuged, and the bacterial pellets  
495 resuspended in PBS supplemented with 4  $\mu$ g/mL Click-iT™ Alexa Fluor™ 488 sDIBO  
496 alkyne (Life Technologies LTD, UK). After incubation at 25°C for 1h with shaking,  
497 bacteria were washed with PBS, and binding to azide-LA was quantified by measuring  
498 fluorescence using a FLUOstar OMEGA plate reader (BMG Labtech, UK). The  
499 samples imaged with a microscope were additionally stained with 3  $\mu$ M propidium  
500 iodide, following click chemistry. Bacteria stained with Click-iT™ Alexa Fluor™ 488  
501 sDIBO alkyne and 3  $\mu$ M propidium iodide were immobilized on agarose-covered glass  
502 slides, and viewed with a Leica DMI8 widefield microscope (Leica Microsystems LTD,  
503 UK). Images were analysed with the ImageJ processing package Fiji (Schindelin *et*  
504 *al.*, 2012).

505 **Live/Dead Staining.** Bacteria grown to OD<sub>600</sub> of 1.0, were treated with 80  $\mu$ M linoleic  
506 acid for 15 min at 37°C with shaking. The samples were then centrifuged, and the  
507 bacterial pellets resuspended in PBS and supplemented with a 1:1 ratio of 2X  
508 LIVE/DEAD solution (6  $\mu$ M SYTO-9 stain and 30  $\mu$ M propidium iodide) from  
509 LIVE/DEAD® BacLight kit (Invitrogen). After incubation in the dark for 15 min, bacteria  
510 were washed with PBS, spotted on to agarose pads and imaged using a Leica DMI8  
511 widefield microscope (Leica Microsystems, UK). Acquired images were analysed with  
512 the ImageJ processing package, Fiji.

513 **Lipid extraction and analyses.** Lipids were extracted from bacterial cultures as  
514 described elsewhere (Smith *et al.*, 2019). Briefly, bacteria were grown to OD1 in TSB  
515 or TSB supplemented with 10  $\mu$ M LA, centrifuged in a 2 mL glass Chromacol vial  
516 (Thermo Scientific), and resuspended in 0.5 mL MS grade methanol (Sigma-Aldrich).

517 MS grade chloroform was then used to extract lipids. The extracted lipids were dried  
518 under nitrogen gas with a Techne sample concentrator (Staffordshire, UK), and the  
519 lipid pellets resuspended in 1 mL acetonitrile. The samples were then analysed by LC-  
520 MS with a Dionex 3400RS HPLC coupled to an amaZon SL quadrupole ion trap mass  
521 spectrometer (Bruker Scientific) via an electrospray ionisation interface. Both positive  
522 and negative ionisation modes were used for sample analyses. The Bruker Compass  
523 software package was utilized for data analyses, using DataAnalysis for peak  
524 identification and characterization of lipid class, and QuantAnalysis for quantification  
525 of the relative abundance of distinct PG species to total PG species.

526 **Cell shaving for surface proteome analysis.** *S. aureus* USA300 JE2 WT grown to  
527 OD1 and  $\Delta$ esxC were washed three times before being treated with Proteomics grade  
528 trypsin from porcine pancreas (Sigma-Aldrich, UK) for 15 min as described (Solis *et*  
529 *al.*, 2014). The samples were then centrifuged at  $1000 \times g$  for 15 min, and the bacterial  
530 pellets discarded while supernatants were filtered through a 0.2  $\mu$ M filter. The freshly  
531 prepared peptides were frozen ( $-20^{\circ}\text{C}$ ) until 2 additional, independent biological  
532 replicates per strain were prepared.

533 **Cellular proteomics.** *S. aureus* strains were grown O/N at  $37^{\circ}\text{C}$  on tryptic soy agar  
534 plates. The next day, single colonies were used to inoculate 10 mL plain TSB or TSB  
535 with 10  $\mu$ M LA. Cultures were grown at  $37^{\circ}\text{C}$  with 180-rpm shaking until an  $\text{OD}_{600}$  of  
536  $3.2 \pm 0.2$  was reached. The bacteria were then centrifuged, washed with PBS, and  
537 resuspended in lysis buffer (PBS, 250 mM sucrose, 1 mM EDTA, and 50  $\mu$ g/mL  
538 lysostaphin) supplemented with cOmplete™, mini, EDTA-free protease inhibitor  
539 cocktail (Sigma-Aldrich, UK). After 15 min incubation at  $37^{\circ}\text{C}$ , cells were lysed  
540 mechanically with silica spheres (Lysing Matrix B, Fischer Scientific, UK) in a fast-prep  
541 shaker as described previously (Mielich-Suss *et al.*, 2017). Samples were then



542 centrifuged, and the supernatants transferred to fresh tubes, where proteins were  
543 reduced and alkylated for 20 min at 70°C with 10 mM TCEP (tris(2-  
544 carboxyethyl)phosphine) and 40 mM CAA (2-chloroacetamide), respectively. Next, the  
545 solvent was exchanged first to 8M urea buffer then to 50 mM ammonium bicarbonate  
546 (ABC). Proteins were digested O/N at 37°C with mass spectrometry grade lysyl  
547 endopeptidase LysC and sequencing grade modified trypsin (Promega LTD, UK).

548 **Preparation of culture supernatant for proteomics analysis.** *S. aureus* strains  
549 were grown to an OD<sub>600</sub> of 3 in TSB. After centrifugation of cultures, supernatants were  
550 sterile-filtered and incubated at 4°C overnight with 10% trichloroacetic acid and 50 µM  
551 sodium deoxycholate in presence of one cOmplete™, Mini, EDTA-free Protease  
552 Inhibitor Cocktail tablet (Sigma-Aldrich, UK). The precipitated proteins (10 000 × g at  
553 4°C for 15 min) were gently washed with acetone and dry at RT for 10 min. After  
554 denaturation, proteins were run on a gel until all the proteins had moved from the  
555 stacking gel to the resolving gel. The gel was then stained with InstantBlue™ (Sigma-  
556 Aldrich, UK) for 3 h, after which the protein bands were excised and diced. Proteins  
557 were in-gel digested with trypsin as recently described (Goodman *et al.*, 2018). Briefly,  
558 proteins were reduced and alkylated for 5 min at 70°C with 10 mM TCEP and 40 mM  
559 CAA, respectively. Tryptic digestion was carried out at O/N at 37°C in 50 mM ABC.

560 **Label-free protein quantification.** Peptides prepared for proteome analyses were  
561 desalted and concentrated with a C18 cartridge in 40 µL MS buffer (2% acetonitrile  
562 plus 0.1% trifluoroacetic acid). For each sample, 20 µL were analysed by nanoLC-  
563 ESI-MS/MS using the Ultimate 3000/Orbitrap Fusion instrumentation (Thermo  
564 Scientific), and a 90-minute LC separation on a 50 cm column. The data were used to  
565 interrogate the Uniprot *Staphylococcus aureus* USA300 database UP000001939, and  
566 the common contaminant database from MaxQuant (Cox *et al.*, 2014). MaxQuant

567 software was used for protein identification and quantification using default settings.  
568 Intensities were log<sub>2</sub>-transformed with the Perseus software, and proteins with one or  
569 no valid value for every sample in triplicate were filtered. For some data, the  
570 removeBatchEffect function of the limma R package (Ritchie *et al.*, 2015) was used to  
571 remove differences accounting for variation in shaving efficiency done on three  
572 different days for all the biological replicates. Missing values in cellular proteomics  
573 data were imputed on R. Specifically, for each sample, the imputed value was either  
574 the lowest intensity across all samples if at least two biological replicates had missing  
575 values or the average of two valid values if only one was missing.

576 **ROS measurement.** Chemical hydrolysis of 2,7-dichlorofluorescein diacetate (Sigma-  
577 Aldrich) was performed to acquire a final dichlorofluorescein (DCF) reagent yield of 50  
578 μM. Briefly, 0.5 ml of 5 mM DCF-DA (dissolved in 100% ethanol), was reacted with 2  
579 ml of 0.1 N NaOH at RT for 30 min. The reaction was stopped using 7.5 mL 10X PBS  
580 pH 7.4 (without calcium and magnesium; Gibco). Bacteria grown to OD<sub>600</sub> of 1.0 were  
581 treated with 10μM linoleic acid or left untreated for 15 min at 37°C shaking and 1 mL  
582 of this culture was centrifuged. Cells were resuspended in 100 μL of DCF reagent and  
583 incubated for 40 min in the dark at RT. Fluorescence was measured using a FLUOstar  
584 OMEGA plate reader (BMG Labtech, UK) at an excitation wavelength of 482 nm and  
585 emission wavelength of 520 nm.

586 **Data availability statement.** The mass spectrometry proteomics data have been  
587 deposited to the ProteomeXchange Consortium via the PRIDE (Perez-Riverol *et al.*,  
588 2019) partner repository with the dataset identifier PXD013081 and  
589 10.6019/PXD013081. Cellular proteomic and surface proteome samples are labelled  
590 MS18-193 and MS17-185, respectively.

591 **Statistical analyses.** Except for the proteomics results, the statistical tests were  
592 performed with GraphPad Prism 8.0 as indicated in the Figure legends, with *P* values  
593 < 0.05 considered significant. A paired two-tailed Student's t-test or a paired Mann-  
594 Whitney U test was used for pairwise comparisons. An ordinary one-way analysis of  
595 variance (ANOVA) with Dunnett's multiple comparisons test or a Kruskal-Wallis test  
596 with Dunn's multiple comparisons test was applied to data from three or more groups.  
597 The fold changes and *P* values of the proteomics data were calculated with the R  
598 package limma (Ritchie *et al.*, 2015), with USA300 JE2 WT or bacteria grown without  
599 LA as references. These fold changes and *P* values were used by the R package  
600 piano (Varemo *et al.*, 2013) to compute the enrichment of gene ontology (GO) terms.

601

## 602 **Acknowledgments**

603 We thank Professor Tracy Palmer (Newcastle University) and Professor Olaf  
604 Scheewind (University of Chicago) for providing us *S. aureus* strains and reagents.  
605 We thank GSK, Siena, Italy for providing the *esxA*, *esxB* mutant strains used in this  
606 study. We acknowledge the contribution of the Proteomics Research Technology  
607 Platform, University of Warwick. The authors have no conflict of interest to declare.

608

609

610

611

612

613

614 **References**

- 615 Alnaseri, H., Arsic, B., Schneider, J.E., Kaiser, J.C., Scinocca, Z.C., Heinrichs, D.E., and  
616 McGavin, M.J. (2015) Inducible Expression of a Resistance-Nodulation-Division-Type  
617 Efflux Pump in *Staphylococcus aureus* Provides Resistance to Linoleic and  
618 Arachidonic Acids. *J Bacteriol* **197**: 1893-1905.
- 619 Aly, K.A., Anderson, M., Ohr, R.J., and Missiakas, D. (2017) Isolation of a Membrane Protein  
620 Complex for Type VII Secretion in *Staphylococcus aureus*. *J Bacteriol* **199**.
- 621 Anderson, M., Aly, K.A., Chen, Y.H., and Missiakas, D. (2013) Secretion of atypical protein  
622 substrates by the ESAT-6 secretion system of *Staphylococcus aureus*. *Mol Microbiol*  
623 **90**: 734-743.
- 624 Anderson, M., Chen, Y.H., Butler, E.K., and Missiakas, D.M. (2011) EsaD, a secretion factor  
625 for the Ess pathway in *Staphylococcus aureus*. *J Bacteriol* **193**: 1583-1589.
- 626 Anderson, M., Ohr, R.J., Aly, K.A., Nacadello, S., Kim, H.K., Schneewind, C.E., Schneewind,  
627 O., and Missiakas, D. (2017) EssE Promotes *Staphylococcus aureus* ESS-Dependent  
628 Protein Secretion To Modify Host Immune Responses during Infection. *J Bacteriol* **199**.
- 629 Arsic, B., Zhu, Y., Heinrichs, D.E., and McGavin, M.J. (2012) Induction of the staphylococcal  
630 proteolytic cascade by antimicrobial fatty acids in community acquired methicillin  
631 resistant *Staphylococcus aureus*. *PLoS One* **7**: e45952.
- 632 Bach, J.N., and Bramkamp, M. (2013) Flotillins functionally organize the bacterial membrane.  
633 *Mol Microbiol* **88**: 1205-1217.
- 634 Bae, T., and Schneewind, O. (2006) Allelic replacement in *Staphylococcus aureus* with  
635 inducible counter-selection. *Plasmid* **55**: 58-63.
- 636 Binns, D., Dimmer, E., Huntley, R., Barrell, D., O'Donovan, C., and Apweiler, R. (2009)  
637 QuickGO: a web-based tool for Gene Ontology searching. *Bioinformatics* **25**: 3045-  
638 3046.

- 639 Bobrovskyy, M., Willing, S.E., Schneewind, O., and Missiakas, D. (2018) EssH peptidoglycan  
640 hydrolase enables *Staphylococcus aureus* type VII secretion across the bacterial cell  
641 wall envelope. *J Bacteriol.*
- 642 Burts, M.L., DeDent, A.C., and Missiakas, D.M. (2008) EsaC substrate for the ESAT-6  
643 secretion pathway and its role in persistent infections of *Staphylococcus aureus*. *Mol*  
644 *Microbiol* **69**: 736-746.
- 645 Burts, M.L., Williams, W.A., DeBord, K., and Missiakas, D.M. (2005) EsxA and EsxB are  
646 secreted by an ESAT-6-like system that is required for the pathogenesis of  
647 *Staphylococcus aureus* infections. *Proc Natl Acad Sci U S A* **102**: 1169-1174.
- 648 Cao, Z., Casabona, M.G., Kneuper, H., Chalmers, J.D., and Palmer, T. (2016) The type VII  
649 secretion system of *Staphylococcus aureus* secretes a nuclease toxin that targets  
650 competitor bacteria. *Nat Microbiol* **2**: 16183.
- 651 Cartron, M.L., England, S.R., Chiriac, A.I., Josten, M., Turner, R., Rauter, Y., Hurd, A., Sahl,  
652 H.G., Jones, S., and Foster, S.J. (2014) Bactericidal activity of the human skin fatty  
653 acid cis-6-hexadecanoic acid on *Staphylococcus aureus*. *Antimicrob Agents*  
654 *Chemother* **58**: 3599-3609.
- 655 Casabona, M.G., Buchanan, G., Zoltner, M., Harkins, C.P., Holden, M.T.G., and Palmer, T.  
656 (2017a) Functional analysis of the EsaB component of the *Staphylococcus aureus*  
657 Type VII secretion system. *Microbiology*.
- 658 Casabona, M.G., Kneuper, H., Alferes de Lima, D., Harkins, C.P., Zoltner, M., Hjerde, E.,  
659 Holden, M.T.G., and Palmer, T. (2017b) Haem-iron plays a key role in the regulation  
660 of the Ess/type VII secretion system of *Staphylococcus aureus* RN6390. *Microbiology*  
661 **163**: 1839-1850.
- 662 Cassat, J., Dunman, P.M., Murphy, E., Projan, S.J., Beenken, K.E., Palm, K.J., Yang, S.J.,  
663 Rice, K.C., Bayles, K.W., and Smeltzer, M.S. (2006) Transcriptional profiling of a  
664 *Staphylococcus aureus* clinical isolate and its isogenic agr and sarA mutants reveals  
665 global differences in comparison to the laboratory strain RN6390. *Microbiology* **152**:  
666 3075-3090.

- 667 Chamberlain, N.R., Mehrrens, B.G., Xiong, Z., Kapral, F.A., Boardman, J.L., and Rearick, J.I.  
668 (1991) Correlation of carotenoid production, decreased membrane fluidity, and  
669 resistance to oleic acid killing in *Staphylococcus aureus* 18Z. *Infect Immun* **59**: 4332-  
670 4337.
- 671 Clarke, S.R., Mohamed, R., Bian, L., Routh, A.F., Kokai-Kun, J.F., Mond, J.J., Tarkowski, A.,  
672 and Foster, S.J. (2007) The *Staphylococcus aureus* surface protein IsdA mediates  
673 resistance to innate defenses of human skin. *Cell Host Microbe* **1**: 199-212.
- 674 Conrad, W.H., Osman, M.M., Shanahan, J.K., Chu, F., Takaki, K.K., Cameron, J., Hopkinson-  
675 Woolley, D., Brosch, R., and Ramakrishnan, L. (2017) Mycobacterial ESX-1 secretion  
676 system mediates host cell lysis through bacterium contact-dependent gross membrane  
677 disruptions. *Proc Natl Acad Sci U S A* **114**: 1371-1376.
- 678 Cox, J., Hein, M.Y., Lubner, C.A., Paron, I., Nagaraj, N., and Mann, M. (2014) Accurate  
679 proteome-wide label-free quantification by delayed normalization and maximal peptide  
680 ratio extraction, termed MaxLFQ. *Mol Cell Proteomics* **13**: 2513-2526.
- 681 Cruciani, M., Etna, M.P., Camilli, R., Giacomini, E., Percario, Z.A., Severa, M., Sandini, S.,  
682 Rizzo, F., Brandi, V., Balsamo, G., Polticelli, F., Affabris, E., Pantosti, A., Bagnoli, F.,  
683 and Coccia, E.M. (2017) *Staphylococcus aureus* Esx Factors Control Human Dendritic  
684 Cell Functions Conditioning Th1/Th17 Response. *Front Cell Infect Microbiol* **7**: 330.
- 685 Delekta, P.C., Shook, J.C., Lydic, T.A., Mulks, M.H., and Hammer, N.D. (2018)  
686 *Staphylococcus aureus* utilizes host-derived lipoprotein particles as sources of  
687 exogenous fatty acids. *J Bacteriol.*
- 688 Dreisbach, A., Hempel, K., Buist, G., Hecker, M., Becher, D., and van Dijk, J.M. (2010) Profiling  
689 the surfacome of *Staphylococcus aureus*. *Proteomics* **10**: 3082-3096.
- 690 Fey, P.D., Endres, J.L., Yajjala, V.K., Widhelm, T.J., Boissy, R.J., Bose, J.L., and Bayles, K.W.  
691 (2013) A genetic resource for rapid and comprehensive phenotype screening of  
692 nonessential *Staphylococcus aureus* genes. *MBio* **4**: e00537-00512.
- 693 Garcia-Fernandez, E., Koch, G., Wagner, R.M., Fekete, A., Stengel, S.T., Schneider, J.,  
694 Mielich-Suss, B., Geibel, S., Markert, S.M., Stigloher, C., and Lopez, D. (2017)

- 695 Membrane Microdomain Disassembly Inhibits MRSA Antibiotic Resistance. *Cell* **171**:  
696 1354-1367 e1320.
- 697 Geiger, T., Francois, P., Liebeke, M., Fraunholz, M., Goerke, C., Krismer, B., Schrenzel, J.,  
698 Lalk, M., and Wolz, C. (2012) The stringent response of *Staphylococcus aureus* and  
699 its impact on survival after phagocytosis through the induction of intracellular PSMs  
700 expression. *PLoS Pathog* **8**: e1003016.
- 701 George, S.E., Hrubesch, J., Breuing, I., Vetter, N., Korn, N., Hennemann, K., Bleul, L.,  
702 Willmann, M., Ebner, P., Gotz, F., and Wolz, C. (2019) Oxidative stress drives the  
703 selection of quorum sensing mutants in the *Staphylococcus aureus* population. *Proc*  
704 *Natl Acad Sci U S A* **116**: 19145-19154.
- 705 Giachino, P., Engelmann, S., and Bischoff, M. (2001) Sigma(B) activity depends on RsbU in  
706 *Staphylococcus aureus*. *J Bacteriol* **183**: 1843-1852.
- 707 Goodman, J.K., Zampronio, C.G., Jones, A.M.E., and Hernandez-Fernaund, J.R. (2018)  
708 Updates of the In-Gel Digestion Method for Protein Analysis by Mass Spectrometry.  
709 *Proteomics* **18**: e1800236.
- 710 Gordon, R.J., and Lowy, F.D. (2008) Pathogenesis of methicillin-resistant *Staphylococcus*  
711 *aureus* infection. *Clin Infect Dis* **46 Suppl 5**: S350-359.
- 712 Greenway, D.L., and Dyke, K.G. (1979) Mechanism of the inhibitory action of linoleic acid on  
713 the growth of *Staphylococcus aureus*. *J Gen Microbiol* **115**: 233-245.
- 714 Groicher, K.H., Firek, B.A., Fujimoto, D.F., and Bayles, K.W. (2000) The *Staphylococcus*  
715 *aureus* *lrgAB* operon modulates murein hydrolase activity and penicillin tolerance. *J*  
716 *Bacteriol* **182**: 1794-1801.
- 717 Hempel, K., Herbst, F.A., Moche, M., Hecker, M., and Becher, D. (2011) Quantitative  
718 proteomic view on secreted, cell surface-associated, and cytoplasmic proteins of the  
719 methicillin-resistant human pathogen *Staphylococcus aureus* under iron-limited  
720 conditions. *J Proteome Res* **10**: 1657-1666.
- 721 Horsburgh, M.J., Ingham, E., and Foster, S.J. (2001) In *Staphylococcus aureus*, *fur* is an  
722 interactive regulator with *PerR*, contributes to virulence, and is necessary for oxidative

- 723 stress resistance through positive regulation of catalase and iron homeostasis. *J*  
724 *Bacteriol* **183**: 468-475.
- 725 Ishii, K., Adachi, T., Yasukawa, J., Suzuki, Y., Hamamoto, H., and Sekimizu, K. (2014)  
726 Induction of virulence gene expression in *Staphylococcus aureus* by pulmonary  
727 surfactant. *Infect Immun* **82**: 1500-1510.
- 728 Jager, F., Kneuper, H., and Palmer, T. (2018) EssC is a specificity determinant for  
729 *Staphylococcus aureus* type VII secretion. *Microbiology* **164**: 816-820.
- 730 Johnson, M., Sengupta, M., Purves, J., Tarrant, E., Williams, P.H., Cockayne, A., Muthaiyan,  
731 A., Stephenson, R., Ledala, N., Wilkinson, B.J., Jayaswal, R.K., and Morrissey, J.A.  
732 (2011) Fur is required for the activation of virulence gene expression through the  
733 induction of the sae regulatory system in *Staphylococcus aureus*. *Int J Med Microbiol*  
734 **301**: 44-52.
- 735 Kelsey, J.A., Bayles, K.W., Shafii, B., and McGuire, M.A. (2006) Fatty acids and  
736 monoacylglycerols inhibit growth of *Staphylococcus aureus*. *Lipids* **41**: 951-961.
- 737 Kenny, J.G., Ward, D., Josefsson, E., Jonsson, I.M., Hinds, J., Rees, H.H., Lindsay, J.A.,  
738 Tarkowski, A., and Horsburgh, M.J. (2009) The *Staphylococcus aureus* response to  
739 unsaturated long chain free fatty acids: survival mechanisms and virulence  
740 implications. *PLoS One* **4**: e4344.
- 741 Kneuper, H., Cao, Z.P., Twomey, K.B., Zoltner, M., Jager, F., Cargill, J.S., Chalmers, J., van  
742 der Kooi-Pol, M.M., van Dijk, J.M., Ryan, R.P., Hunter, W.N., and Palmer, T. (2014)  
743 Heterogeneity in ess transcriptional organization and variable contribution of the  
744 Ess/Type VII protein secretion system to virulence across closely related  
745 *Staphylococcus aureus* strains. *Mol Microbiol* **93**: 928-943.
- 746 Kohler, T., Weidenmaier, C., and Peschel, A. (2009) Wall teichoic acid protects  
747 *Staphylococcus aureus* against antimicrobial fatty acids from human skin. *J Bacteriol*  
748 **191**: 4482-4484.
- 749 Korea, C.G., Balsamo, G., Pezzicoli, A., Merakou, C., Tavarini, S., Bagnoli, F., Serruto, D.,  
750 and Unnikrishnan, M. (2014) Staphylococcal Esx proteins modulate apoptosis and



- 751 release of intracellular *Staphylococcus aureus* during infection in epithelial cells. *Infect*  
752 *Immun* **82**: 4144-4153.
- 753 Lee, A.S., de Lencastre, H., Garau, J., Kluytmans, J., Malhotra-Kumar, S., Peschel, A., and  
754 Harbarth, S. (2018) Methicillin-resistant *Staphylococcus aureus*. *Nat Rev Dis Primers*  
755 **4**: 18033.
- 756 Liang, X., Zheng, L., Landwehr, C., Lunsford, D., Holmes, D., and Ji, Y. (2005) Global  
757 regulation of gene expression by ArlRS, a two-component signal transduction  
758 regulatory system of *Staphylococcus aureus*. *J Bacteriol* **187**: 5486-5492.
- 759 Lopez, M.S., Tan, I.S., Yan, D., Kang, J., McCreary, M., Modrusan, Z., Austin, C.D., Xu, M.,  
760 and Brown, E.J. (2017) Host-derived fatty acids activate type VII secretion in  
761 *Staphylococcus aureus*. *Proc Natl Acad Sci U S A* **114**: 11223-11228.
- 762 Mashruwala, A.A., Guchte, A.V., and Boyd, J.M. (2017) Impaired respiration elicits SrrAB-  
763 dependent programmed cell lysis and biofilm formation in *Staphylococcus aureus*. *Elife*  
764 **6**.
- 765 Mielich-Suss, B., Wagner, R.M., Mietrach, N., Hertlein, T., Marincola, G., Ohlsen, K., Geibel,  
766 S., and Lopez, D. (2017) Flotillin scaffold activity contributes to type VII secretion  
767 system assembly in *Staphylococcus aureus*. *PLoS Pathog* **13**: e1006728.
- 768 Moran, J.C., Alorabi, J.A., and Horsburgh, M.J. (2017) Comparative Transcriptomics Reveals  
769 Discrete Survival Responses of *S. aureus* and *S. epidermidis* to Sapienic Acid. *Front*  
770 *Microbiol* **8**: 33.
- 771 Neumann, Y., Ohlsen, K., Donat, S., Engelmann, S., Kusch, H., Albrecht, D., Cartron, M.,  
772 Hurd, A., and Foster, S.J. (2015) The effect of skin fatty acids on *Staphylococcus*  
773 *aureus*. *Arch Microbiol* **197**: 245-267.
- 774 Nguyen, M.T., Hanzelmann, D., Hartner, T., Peschel, A., and Gotz, F. (2016) Skin-Specific  
775 Unsaturated Fatty Acids Boost the *Staphylococcus aureus* Innate Immune Response.  
776 *Infect Immun* **84**: 205-215.
- 777 Ohr, R.J., Anderson, M., Shi, M., Schneewind, O., and Missiakas, D. (2017) EssD, a Nuclease  
778 Effector of the *Staphylococcus aureus* ESS Pathway. *J Bacteriol* **199**.

- 779 Parsons, J.B., Broussard, T.C., Bose, J.L., Rosch, J.W., Jackson, P., Subramanian, C., and  
780 Rock, C.O. (2014) Identification of a two-component fatty acid kinase responsible for  
781 host fatty acid incorporation by *Staphylococcus aureus*. *Proc Natl Acad Sci U S A* **111**:  
782 10532-10537.
- 783 Parsons, J.B., Frank, M.W., Subramanian, C., Saenkham, P., and Rock, C.O. (2011)  
784 Metabolic basis for the differential susceptibility of Gram-positive pathogens to fatty  
785 acid synthesis inhibitors. *Proc Natl Acad Sci U S A* **108**: 15378-15383.
- 786 Parsons, J.B., Yao, J., Frank, M.W., Jackson, P., and Rock, C.O. (2012) Membrane disruption  
787 by antimicrobial fatty acids releases low-molecular-weight proteins from  
788 *Staphylococcus aureus*. *J Bacteriol* **194**: 5294-5304.
- 789 Pasztor, L., Ziebandt, A.K., Nega, M., Schlag, M., Haase, S., Franz-Wachtel, M., Madlung, J.,  
790 Nordheim, A., Heinrichs, D.E., and Gotz, F. (2010) Staphylococcal major autolysin (Atl)  
791 is involved in excretion of cytoplasmic proteins. *J Biol Chem* **285**: 36794-36803.
- 792 Patton, T.G., Yang, S.J., and Bayles, K.W. (2006) The role of proton motive force in expression  
793 of the *Staphylococcus aureus* cid and lrg operons. *Mol Microbiol* **59**: 1395-1404.
- 794 Perez-Riverol, Y., Csordas, A., Bai, J., Bernal-Llinares, M., Hewapathirana, S., Kundu, D.J.,  
795 Inuganti, A., Griss, J., Mayer, G., Eisenacher, M., Perez, E., Uszkoreit, J., Pfeuffer, J.,  
796 Sachsenberg, T., Yilmaz, S., Tiwary, S., Cox, J., Audain, E., Walzer, M., Jarnuczak,  
797 A.F., Ternent, T., Brazma, A., and Vizcaino, J.A. (2019) The PRIDE database and  
798 related tools and resources in 2019: improving support for quantification data. *Nucleic  
799 Acids Res* **47**: D442-D450.
- 800 Pulschen, A.A., Sastre, D.E., Machinandiarena, F., Crotta Asis, A., Albanesi, D., de Mendoza,  
801 D., and Gueiros-Filho, F.J. (2017) The stringent response plays a key role in *Bacillus*  
802 *subtilis* survival of fatty acid starvation. *Mol Microbiol* **103**: 698-712.
- 803 Ritchie, M.E., Phipson, B., Wu, D., Hu, Y., Law, C.W., Shi, W., and Smyth, G.K. (2015) limma  
804 powers differential expression analyses for RNA-sequencing and microarray studies.  
805 *Nucleic Acids Res* **43**: e47.

- 806 Saeloh, D., Tipmanee, V., Jim, K.K., Dekker, M.P., Bitter, W., Voravuthikunchai, S.P., Wenzel,  
807 M., and Hamoen, L.W. (2018) The novel antibiotic rhodomyrton traps membrane  
808 proteins in vesicles with increased fluidity. *PLoS Pathog* **14**: e1006876.
- 809 Schindelin, J., Arganda-Carreras, I., Frise, E., Kaynig, V., Longair, M., Pietzsch, T., Preibisch,  
810 S., Rueden, C., Saalfeld, S., Schmid, B., Tinevez, J.Y., White, D.J., Hartenstein, V.,  
811 Eliceiri, K., Tomancak, P., and Cardona, A. (2012) Fiji: an open-source platform for  
812 biological-image analysis. *Nat Methods* **9**: 676-682.
- 813 Sen, S., Sirobhushanam, S., Johnson, S.R., Song, Y., Tefft, R., Gatto, C., and Wilkinson, B.J.  
814 (2016) Growth-Environment Dependent Modulation of *Staphylococcus aureus*  
815 Branched-Chain to Straight-Chain Fatty Acid Ratio and Incorporation of Unsaturated  
816 Fatty Acids. *PLoS One* **11**: e0165300.
- 817 Smith, A.F., Rihtman, B., Stirrup, R., Silvano, E., Mausz, M.A., Scanlan, D.J., and Chen, Y.  
818 (2019) Elucidation of glutamine lipid biosynthesis in marine bacteria reveals its  
819 importance under phosphorus deplete growth in Rhodobacteraceae. *ISME J* **13**: 39-  
820 49.
- 821 Solis, N., Parker, B.L., Kwong, S.M., Robinson, G., Firth, N., and Cordwell, S.J. (2014)  
822 *Staphylococcus aureus* surface proteins involved in adaptation to oxacillin identified  
823 using a novel cell shaving approach. *J Proteome Res* **13**: 2954-2972.
- 824 Tiwari, K.B., Gatto, C., and Wilkinson, B.J. (2018) Interrelationships between Fatty Acid  
825 Composition, Staphyloxanthin Content, Fluidity, and Carbon Flow in the  
826 *Staphylococcus aureus* Membrane. *Molecules* **23**.
- 827 Tong, S.Y., Davis, J.S., Eichenberger, E., Holland, T.L., and Fowler, V.G., Jr. (2015)  
828 *Staphylococcus aureus* infections: epidemiology, pathophysiology, clinical  
829 manifestations, and management. *Clin Microbiol Rev* **28**: 603-661.
- 830 Truong-Bolduc, Q.C., Villet, R.A., Estabrooks, Z.A., and Hooper, D.C. (2014) Native efflux  
831 pumps contribute resistance to antimicrobials of skin and the ability of *Staphylococcus*  
832 *aureus* to colonize skin. *J Infect Dis* **209**: 1485-1493.

- 833 Unnikrishnan, M., Constantinidou, C., Palmer, T., and Pallen, M.J. (2017) The Enigmatic Esx  
834 Proteins: Looking Beyond Mycobacteria. *Trends Microbiol* **25**: 192-204.
- 835 Varemo, L., Nielsen, J., and Nookaew, I. (2013) Enriching the gene set analysis of genome-  
836 wide data by incorporating directionality of gene expression and combining statistical  
837 hypotheses and methods. *Nucleic Acids Res* **41**: 4378-4391.
- 838 Ventura, C.L., Malachowa, N., Hammer, C.H., Nardone, G.A., Robinson, M.A., Kobayashi,  
839 S.D., and DeLeo, F.R. (2010) Identification of a novel *Staphylococcus aureus* two-  
840 component leukotoxin using cell surface proteomics. *PLoS One* **5**: e11634.
- 841 von Eiff, C., Becker, K., Machka, K., Stammer, H., and Peters, G. (2001) Nasal carriage as a  
842 source of *Staphylococcus aureus* bacteremia. Study Group. *N Engl J Med* **344**: 11-16.
- 843 Wang, Y., Hu, M., Liu, Q., Qin, J., Dai, Y., He, L., Li, T., Zheng, B., Zhou, F., Yu, K., Fang, J.,  
844 Liu, X., Otto, M., and Li, M. (2016) Role of the ESAT-6 secretion system in virulence  
845 of the emerging community-associated *Staphylococcus aureus* lineage ST398. *Sci*  
846 *Rep* **6**: 25163.
- 847 Warne, B., Harkins, C.P., Harris, S.R., Vatsiou, A., Stanley-Wall, N., Parkhill, J., Peacock,  
848 S.J., Palmer, T., and Holden, M.T. (2016) The Ess/Type VII secretion system of  
849 *Staphylococcus aureus* shows unexpected genetic diversity. *BMC Genomics* **17**: 222.
- 850 Wood, T.E., Howard, S.A., Forster, A., Nolan, L.M., Manoli, E., Bullen, N.P., Yau, H.C.L.,  
851 Hachani, A., Hayward, R.D., Whitney, J.C., Vollmer, W., Freemont, P.S., and Filloux,  
852 A. (2019) The *Pseudomonas aeruginosa* T6SS Delivers a Periplasmic Toxin that  
853 Disrupts Bacterial Cell Morphology. *Cell Rep* **29**: 187-201 e187.
- 854 Zoltner, M., Ng, W.M., Money, J.J., Fyfe, P.K., Kneuper, H., Palmer, T., and Hunter, W.N.  
855 (2016) EssC: domain structures inform on the elusive translocation channel in the Type  
856 VII secretion system. *Biochem J* **473**: 1941-1952.
- 857

858 **Figure legends**

859 **Fig. 1. Membrane defects in the absence of EsxC.**

860 **A.** FM1-43 fluorescence of *S. aureus* WT,  $\Delta$ essC, and  $\Delta$ esxC as measured with a  
861 plate reader. Means  $\pm$  standard deviation (SD) are shown,  $n = 6$ ; \* indicates  $P < 0.05$   
862 using a Kruskal-Wallis test with Dunn's test.

863 **B.** Survival of  $\Delta$ esxC or  $\Delta$ essC after a 2h-treatment with 0.1% Triton X-100 relative to  
864 the WT. Means are shown; error bars represent standard deviation (SD).  $n = 4$ , \*  
865 indicates  $P < 0.05$  using a Kruskal-Wallis test with Dunn's test. The panel on the right  
866 shows a representative picture of bacteria before and after Triton X-100-treatment.

867 **C.** The membrane fluidity of WT and  $\Delta$ esxC as measured with a pyrene decanoic acid  
868 staining-based assay. Mean values are shown; error bars represent standard error of  
869 the mean (SEM).  $n = 6$ , \* indicates  $P < 0.05$  using a two-tailed t-test.

870 **D.** Widefield micrographs of *S. aureus* WT and  $\Delta$ esxC after growth in TSB to OD<sub>600</sub> of  
871 1.0 in the presence of the lipophilic dye DilC12. Images are representative of 4  
872 independent experiments.

873 **E.** The DilC12 fluorescence of 80 bacterial clusters from different fields per strain was  
874 quantitated with ImageJ. Means  $\pm$  standard deviation (SD) are shown,  $n = 4$ ; indicates  
875 \*\*\*\*  $P < 0.0001$ , using a Kruskal-Wallis rank test

876 **Fig. 2. Enhanced *S. aureus* growth inhibition by linoleic acid in T7SS mutants.**

877 **A.** *S. aureus* WT USA300,  $\Delta$ essC, and  $\Delta$ esxC were grown in TSB or TSB  
878 supplemented with 80  $\mu$ M of either linoleic (LA) or stearic acid (SA). Means  $\pm$  standard  
879 error of the mean (SEM) are shown.

880 **B.** After 14h growth as described in (A) bacteria were serially diluted, and CFU were  
881 determined. Mean values are presented, and the error bars represent SD.  $n = 3$ , \*\*  
882 indicates  $P < 0.01$  using one-way ANOVA with Dunnett's test.

883 **C.** USA300 WT with the empty pOS1 plasmid (WT pOS1) and USA300 JE2 *esxC*  
884 mutant with either pOS1 ( $\Delta esxC$  pOS1) or pOS1-*esxC* ( $\Delta esxC$  pOS1-*esxC*) were  
885 grown in TSB or TSB + 80  $\mu\text{M}$  LA as described in (A) followed by CFU estimation.  
886 Mean values are shown; error bars represent SD.  $n = 5$ , \*\* indicates  $P < 0.01$  using  
887 one-way ANOVA with Dunnett's test.

888 **D.** Newman WT with the empty pOS1 plasmid (WT pOS1) and Newman *esxA* mutant  
889 with either pOS1 ( $\Delta esxA$  pOS1) or pOS1-*esxA* ( $\Delta esxA$  pOS1-*esxA*) were grown in TSB or  
890 TSB + 40  $\mu\text{M}$  LA or SA. Means  $\pm$  standard error of the mean (SEM) are shown,  $n = 4$ .

891 **Fig. 3. T7SS mutants display increased membrane permeability upon LA**  
892 **binding.**

893 **A.** Chemical structure of azide functionalised linoleic acid (azide-LA;  $N^6$ -diazo- $N^2$ -  
894 ((9Z,12Z)-octadeca-9,12-dienoyl)lysine,  $N_3$ -LA). Highlighted in green is the azido  
895 lysine.

896 **B.** *S. aureus* USA300 WT,  $\Delta esxC$ , and  $\Delta esxC$  were grown with shaking in TSB to  
897  $\text{OD}_{600}$  of 1.0. Bacteria were then stained for 15 min with 10  $\mu\text{M}$  azide-LA prior to  
898 labelling for 1 h with alkyne Alexa Fluor 488. Mean percentage of fluorescence values  
899 relative to WT (100%) are presented; error bars represent SD,  $n = 5$ .

900 **C.** Micrographs of bacteria grown in TSB and treated as described in (B) and  
901 additionally stained with propidium iodide (PI).

902 **D.** ImageJ was used to quantitate PI fluorescence of bacterial clusters from 12 different  
903 fields per strain. Each box-and-whisker plot depicts the minimal and maximal PI

904 intensities, the median is the vertical bar inside the box, which is delimited by the lower  
905 and upper quartiles. \*\* indicates  $P < 0.01$  using one-way ANOVA with Dunnett's test.

906 **Fig. 4. T7SS mutants display increased PI staining when treated with LA.**

907 Live/Dead staining of *S. aureus* USA300 WT,  $\Delta$ essC or  $\Delta$ esxC mutants after growth  
908 to OD<sub>600</sub> of 1.0, without (A) or with treatment with 80 $\mu$ M (B) linoleic acid. Images are  
909 representative of 3 independent experiments.

910 C. The ratio of SYTO 9: PI fluorescence (live:dead cells) of 25 different fields per strain  
911 was quantitated with ImageJ. Means  $\pm$  SD are shown,  $n = 3$ ; \*\*\* indicates  $P < 0.001$ ,  
912 \*\* indicates  $P < 0.01$  using a one-way ANOVA with Tukey's multiple-comparison test

913 **Fig. 5. T7SS mutants are less able to incorporate LA into their phospholipids.**

914 Representative HPLC chromatograms of native phosphatidylglycerol (PG) species of  
915 *S. aureus* USA300 JE2 WT (A) or  $\Delta$ esxC (B) grown in TSB (top panel) or in TSB  
916 supplemented with 10  $\mu$ M LA (bottom panel), in negative ionisation mode. Relative  
917 quantification of the indicated PG species containing an unsaturated FA in WT,  $\Delta$ essC  
918 and  $\Delta$ esxC. C18:2-containing PG species (C) and total unsaturated exogenous PG  
919 species (D) are presented as ratios of total PG species. Mean values are shown; error  
920 bars represent SD.  $n = 3$ , \* indicates  $P < 0.05$  using one-way ANOVA with Dunnett's  
921 test.

922 **Fig. 6. Quantitative proteomics shows altered cellular content and bacterial**

923 **response to LA in T7SS mutants.** *S. aureus* USA300 WT and mutants ( $\Delta$ essC and  
924  $\Delta$ esxC) were grown in TSB or TSB supplemented with LA.

925 A. Venn diagram showing the number of proteins with altered abundance compared  
926 to WT specific to  $\Delta$ essC (23) or  $\Delta$ esxC (10), and common to  $\Delta$ essC and  $\Delta$ esxC (14).

927 **B.** The fourteen proteins that are similarly changed in  $\Delta$ essC and  $\Delta$ esxC mutants are  
928 highlighted on a volcano plot.

929 **C.** Volcano plot showing the extensive change in the LA-treated WT compared to WT.

930 **D.** Venn diagram displaying the numbers of proteins with altered relative abundance  
931 upon LA challenge of WT (LA.WT),  $\Delta$ essC (LA.dEssC) or  $\Delta$ esxC (LA.dEsxC)  
932 compared to the respective untreated samples.

933 **Fig. 7. An altered oxidoreductive response in T7SS mutants in response to LA.**

934 Heatmaps depicting the  $P$  values of enriched (**A**) or diminished (**B**) molecular functions  
935 following a gene set analysis based on GO (gene ontology) annotations. Molecular  
936 functions that are changed in at least one strain ( $P < 0.05$ ) following growth in presence  
937 of LA are shown. The shades of blue (**A**) or red (**B**) correspond to  $-\log_{10}(P \text{ value})$ .

938 ROS levels were measured in cultures of *S. aureus* USA300 JE2 WT,  $\Delta$ essC or  $\Delta$ esxC  
939 grown to OD<sub>600</sub> of 1.0 treated (**C**) with or without LA (**D**) using DCF reagent. Means  $\pm$   
940 SD are shown N=5. \* indicates  $P < 0.05$ , \*\* indicates  $P < 0.01$ , \*\*\* indicates  $P < 0.001$   
941 using the Kruskal-Wallis rank test.

942 **Fig. S1. USA300 JE2 WT and  $\Delta$ esxC strains display similar growth rates.** WT and  
943  $\Delta$ esxC were grown in TSB, and OD<sub>600</sub> monitored with a Novaspec<sup>®</sup> Pro  
944 spectrophotometer. Data shown are means of three independent experiments, and  
945 the error bars indicate the standard errors of the mean.

946 **Fig. S2. EsxC associates with *S. aureus* membrane.** Immunoblot analysis of cell  
947 membrane (CM) or cell wall (CW) fractions of WT (USA300),  $\Delta$ essC, and  $\Delta$ esxC with  
948 anti-EsxC sera or anti-PBP2a antibodies (loading control).

949 **Fig. S3. Volcano plot of the quantitative proteomic analysis of surface proteins**  
950 **in  $\Delta$ esxC compared to WT.** The relative abundance of each protein ( $\log_2$  fold change,



951 X-axis) and its statistical significance ( $P$  value, Y-axis) are shown in the graph.  
952 Proteins decreased by more than half in  $\Delta$ esxC ( $\log_2$  fold change  $< -1$  and  $P$  value  $<$   
953 0.05) are shown in green.

954 **Fig. S4. *S. aureus* growth inhibition by arachidonic acid is increased in T7SS**  
955 **mutants.** *S. aureus* WT USA300,  $\Delta$ essC, and  $\Delta$ esxC were grown in TSB or TSB  
956 supplemented with 80  $\mu$ M arachidonic acid (AA). Means  $\pm$  standard error of the mean  
957 (SEM) are shown,  $n = 3$ .

958 **Fig. S5. T7SS substrates contribute to resistance to linoleic acid toxicity.**

959 A. *S. aureus* USA300 wild-type (WT) and USA300 *esxA* ( $\Delta$ esxA) or *esxB* ( $\Delta$ esxB)  
960 deletion mutants were grown in TSB or TSB supplemented with 80  $\mu$ M linoleic (LA) or  
961 stearic acid (SA).

962 B. *S. aureus* Newman WT and Newman *esxA* ( $\Delta$ esxA) or *esxB* ( $\Delta$ esxB) deletion  
963 mutants were grown similarly in TSB or TSB + 40  $\mu$ M LA or SA.

964 C. Growth curves as described in (A) were done with RN6390 wild-type (WT) and  
965 RN6390 *essC* ( $\Delta$ essC) or *esxC* ( $\Delta$ esxC) deletion mutants. Data shown in (A), (B), and  
966 (C) are representative of at least three independent experiments.

967 **Fig. S6. USA300 JE2 WT and T7SS mutants display similar lipids.**

968 Representative HPLC chromatograms of the indicated bacteria grown in TSB (A) or in  
969 TSB supplemented with LA (B), in negative ionisation mode. Phosphatidylglycerol  
970 (PG) is highlighted.

971 C. Representative HPLC chromatograms of native PG species of  $\Delta$ essC grown in TSB  
972 (top panel) or in TSB supplemented with LA (bottom panel), in negative ionisation  
973 mode.

974 **Fig. S7. LA (C18:2) is elongated and incorporated into *S. aureus***  
975 **phosphatidylglycerol (PG) species.** A-C. Representative mass spectrometry  
976 fragmentation spectra for PG species containing unsaturated fatty acids, in negative  
977 ionisation mode.  
978 A. PG species with mass 731 m/z, containing C18:2 fatty acid (279 m/z).  
979 B. PG species 759 m/z, containing C20:2 fatty acid (307 m/z)  
980 C. PG species 787 m/z, containing C22:2 fatty acid (335 m/z).  
981 D. and E. Relative quantification of the indicated PG species containing an  
982 unsaturated fatty acid in WT,  $\Delta$ essC and  $\Delta$ esxC. C20:2- (D) and C22:2-containing PG  
983 species (E) are presented as ratios of total PG species. Data shown are the means  
984 and error bars represent SD of three independent experiments.

985 **Fig. S8. USA300 JE2 WT and  $\Delta$ esxC growth similarly in presence of sub-**  
986 **inhibitory amounts of linoleic acid.** *S. aureus* WT USA300 and  $\Delta$ esxC were grown  
987 in TSB or TSB supplemented with 40  $\mu$ M linoleic acid (LA). Means  $\pm$  SEM are shown,  
988  $n = 3$ .

989 **Fig. S9. Principal component analysis (PCA) of the *S. aureus* cellular proteomic**  
990 **profiles.** PCA was performed on all the identified proteins of USA300 JE2 WT and  
991 T7SS mutants grown in TSB (untreated) or TSB + LA (LA-treated). Each dot  
992 represents a biological replicate.

993 **Fig. S10.  $^1$ H NMR spectra of NHS-LA (A) and azide-LA (B) in  $CDCl_3$ .** Both spectra  
994 were recorded on a Bruker Advance 300 spectrometer (300 MHz) at 27 °C. The letters  
995 indicate the chemical shift  $\delta$  (in parts per million, ppm) of the protons in each molecule.

996 **Dataset S1. Differentially abundant proteins in WT USA300 JE2 and T7SS**  
997 **mutants in response to linoleic acid.**



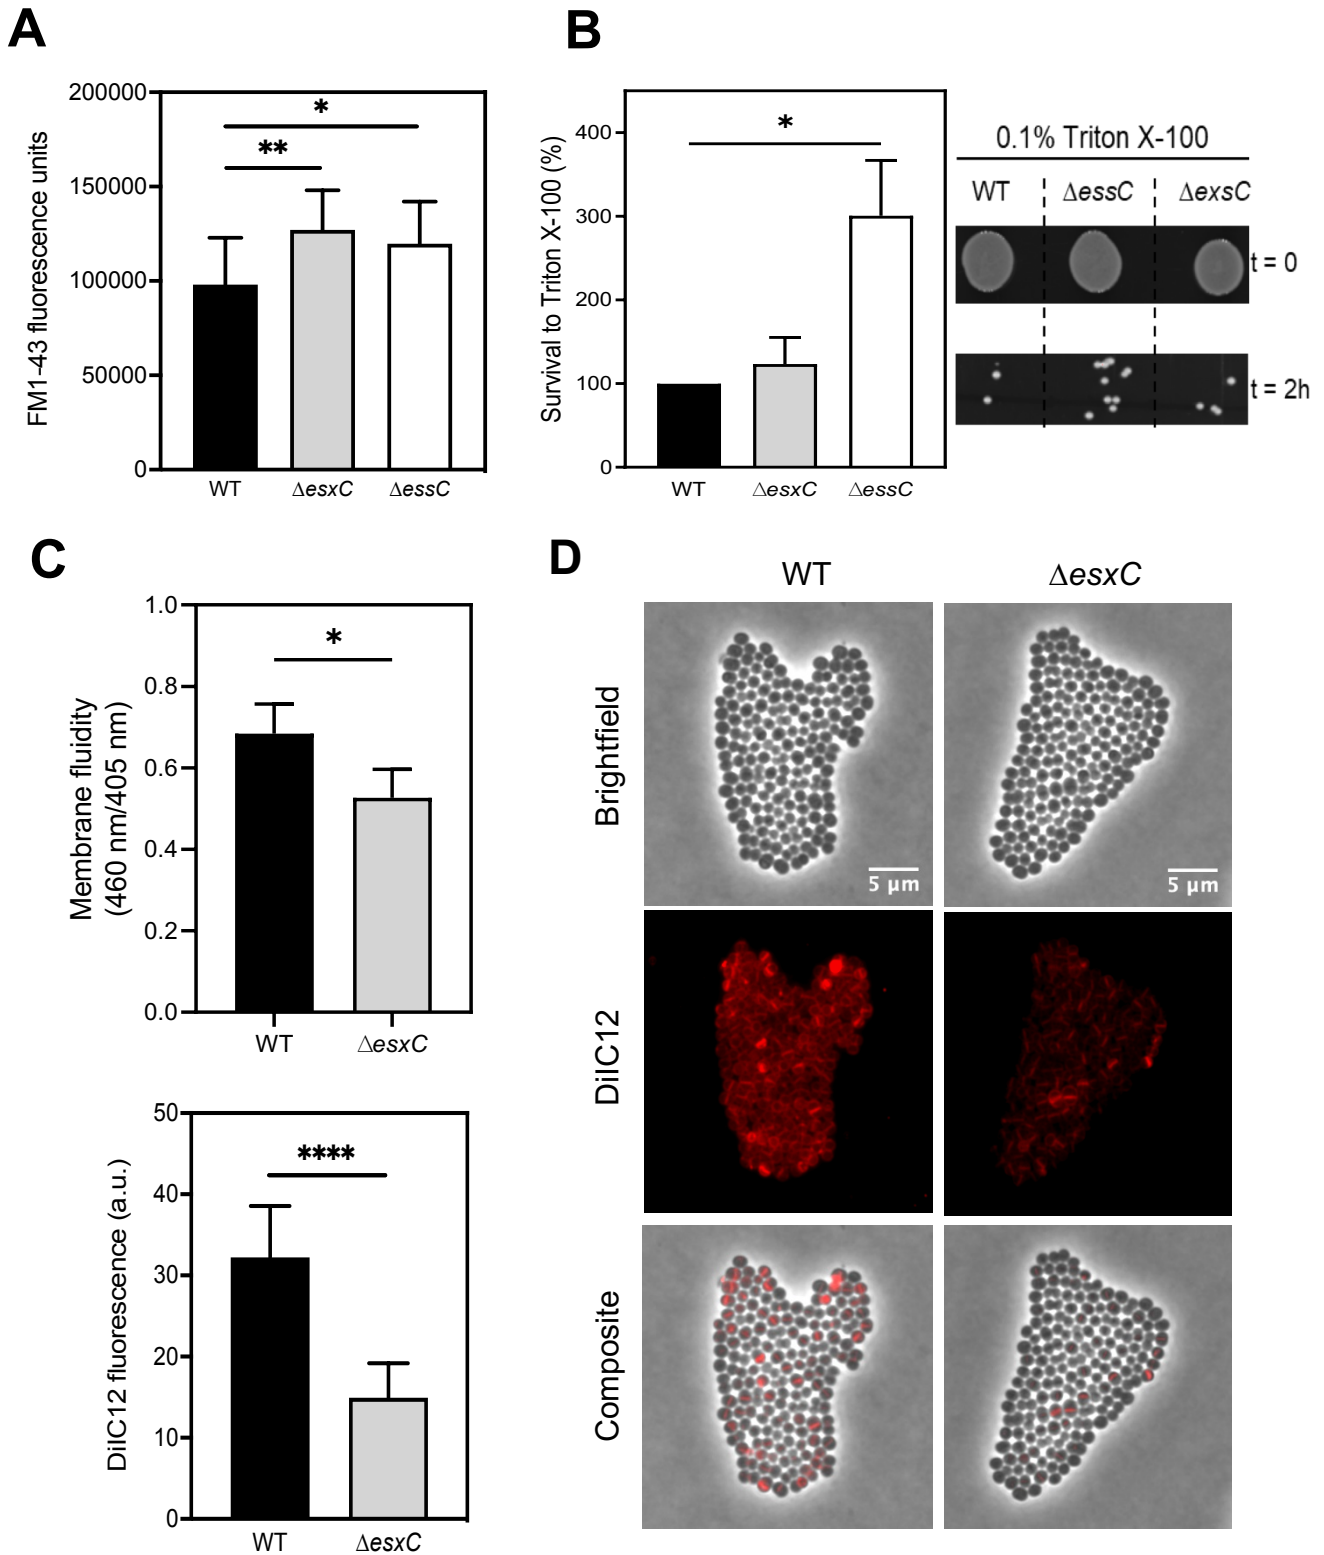

**Fig 1**

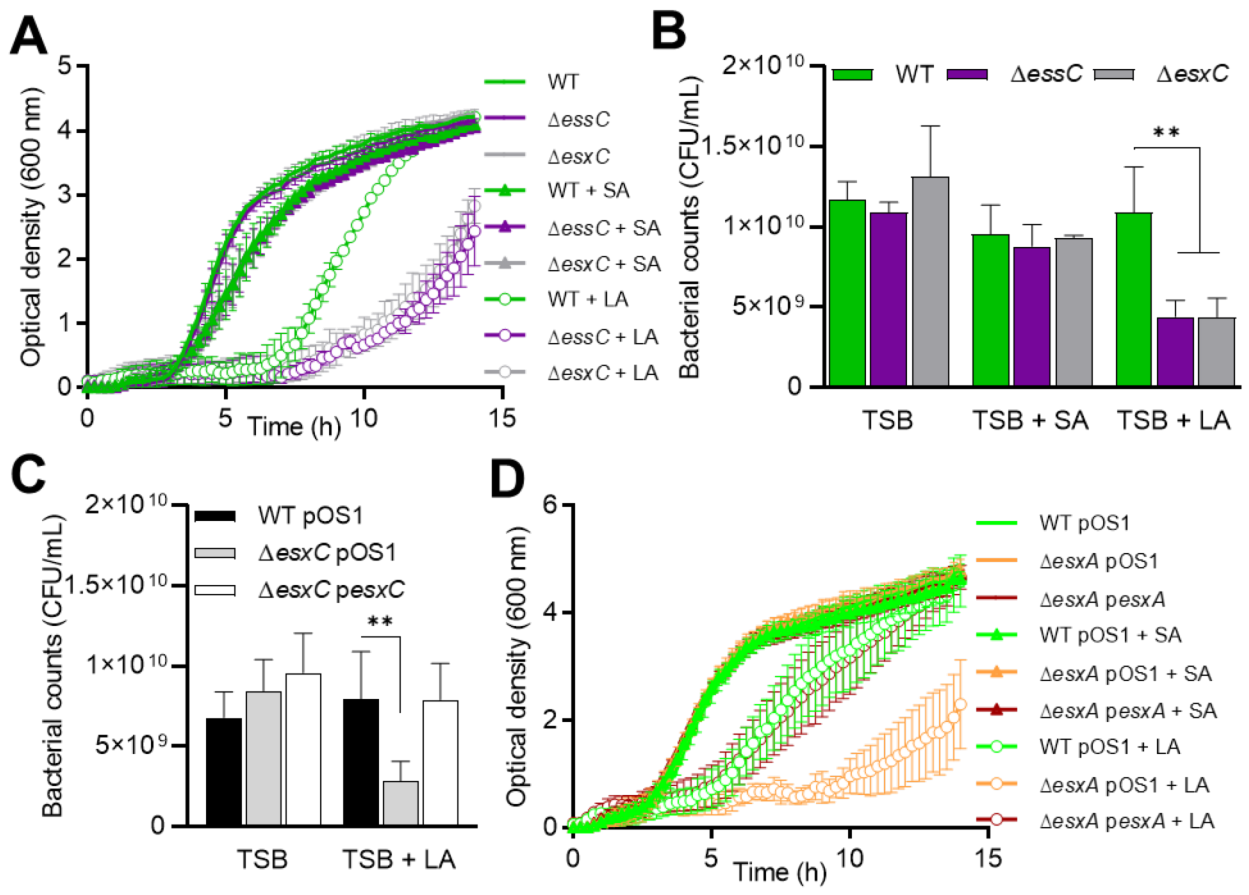

**Fig 2**

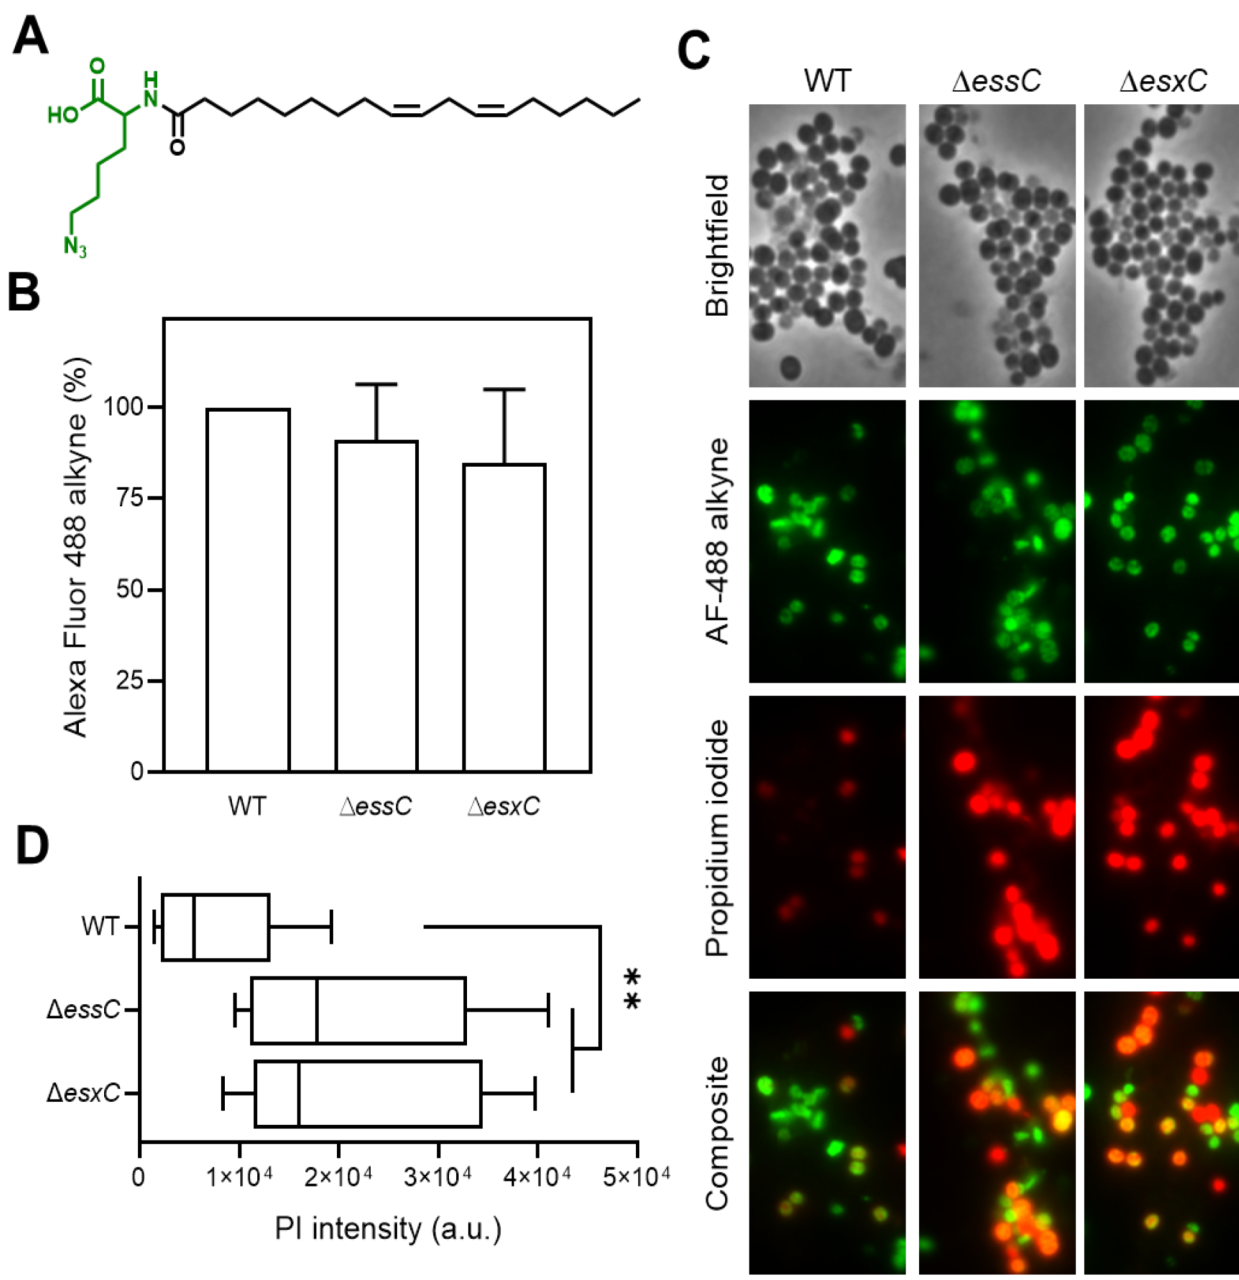

**Fig 3**

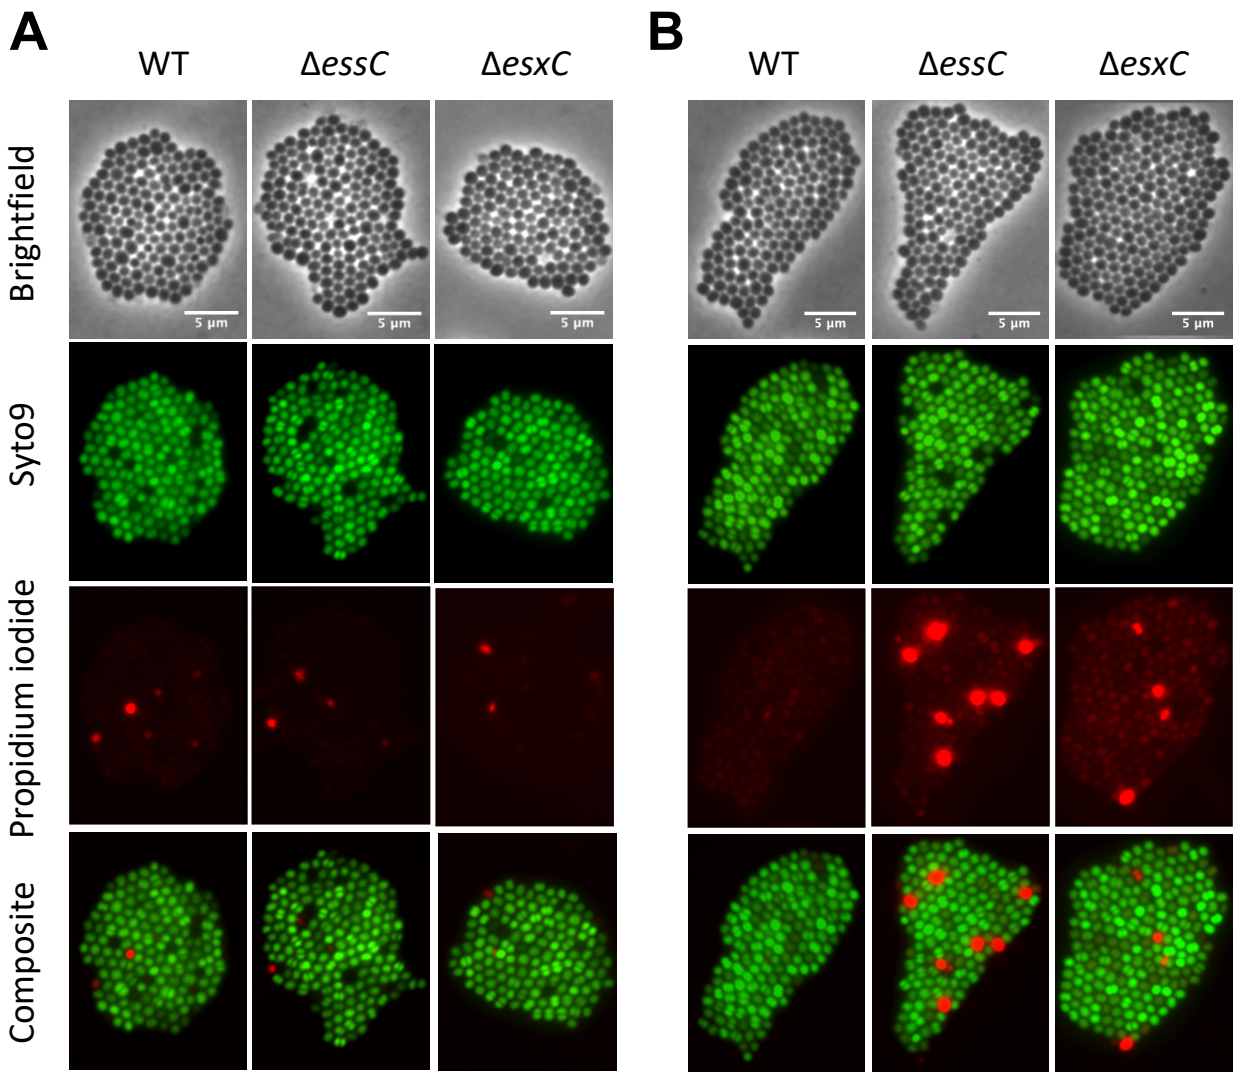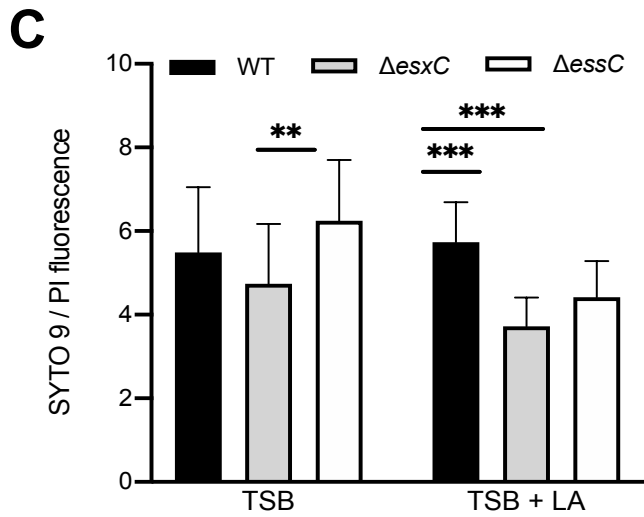

**Fig 4**

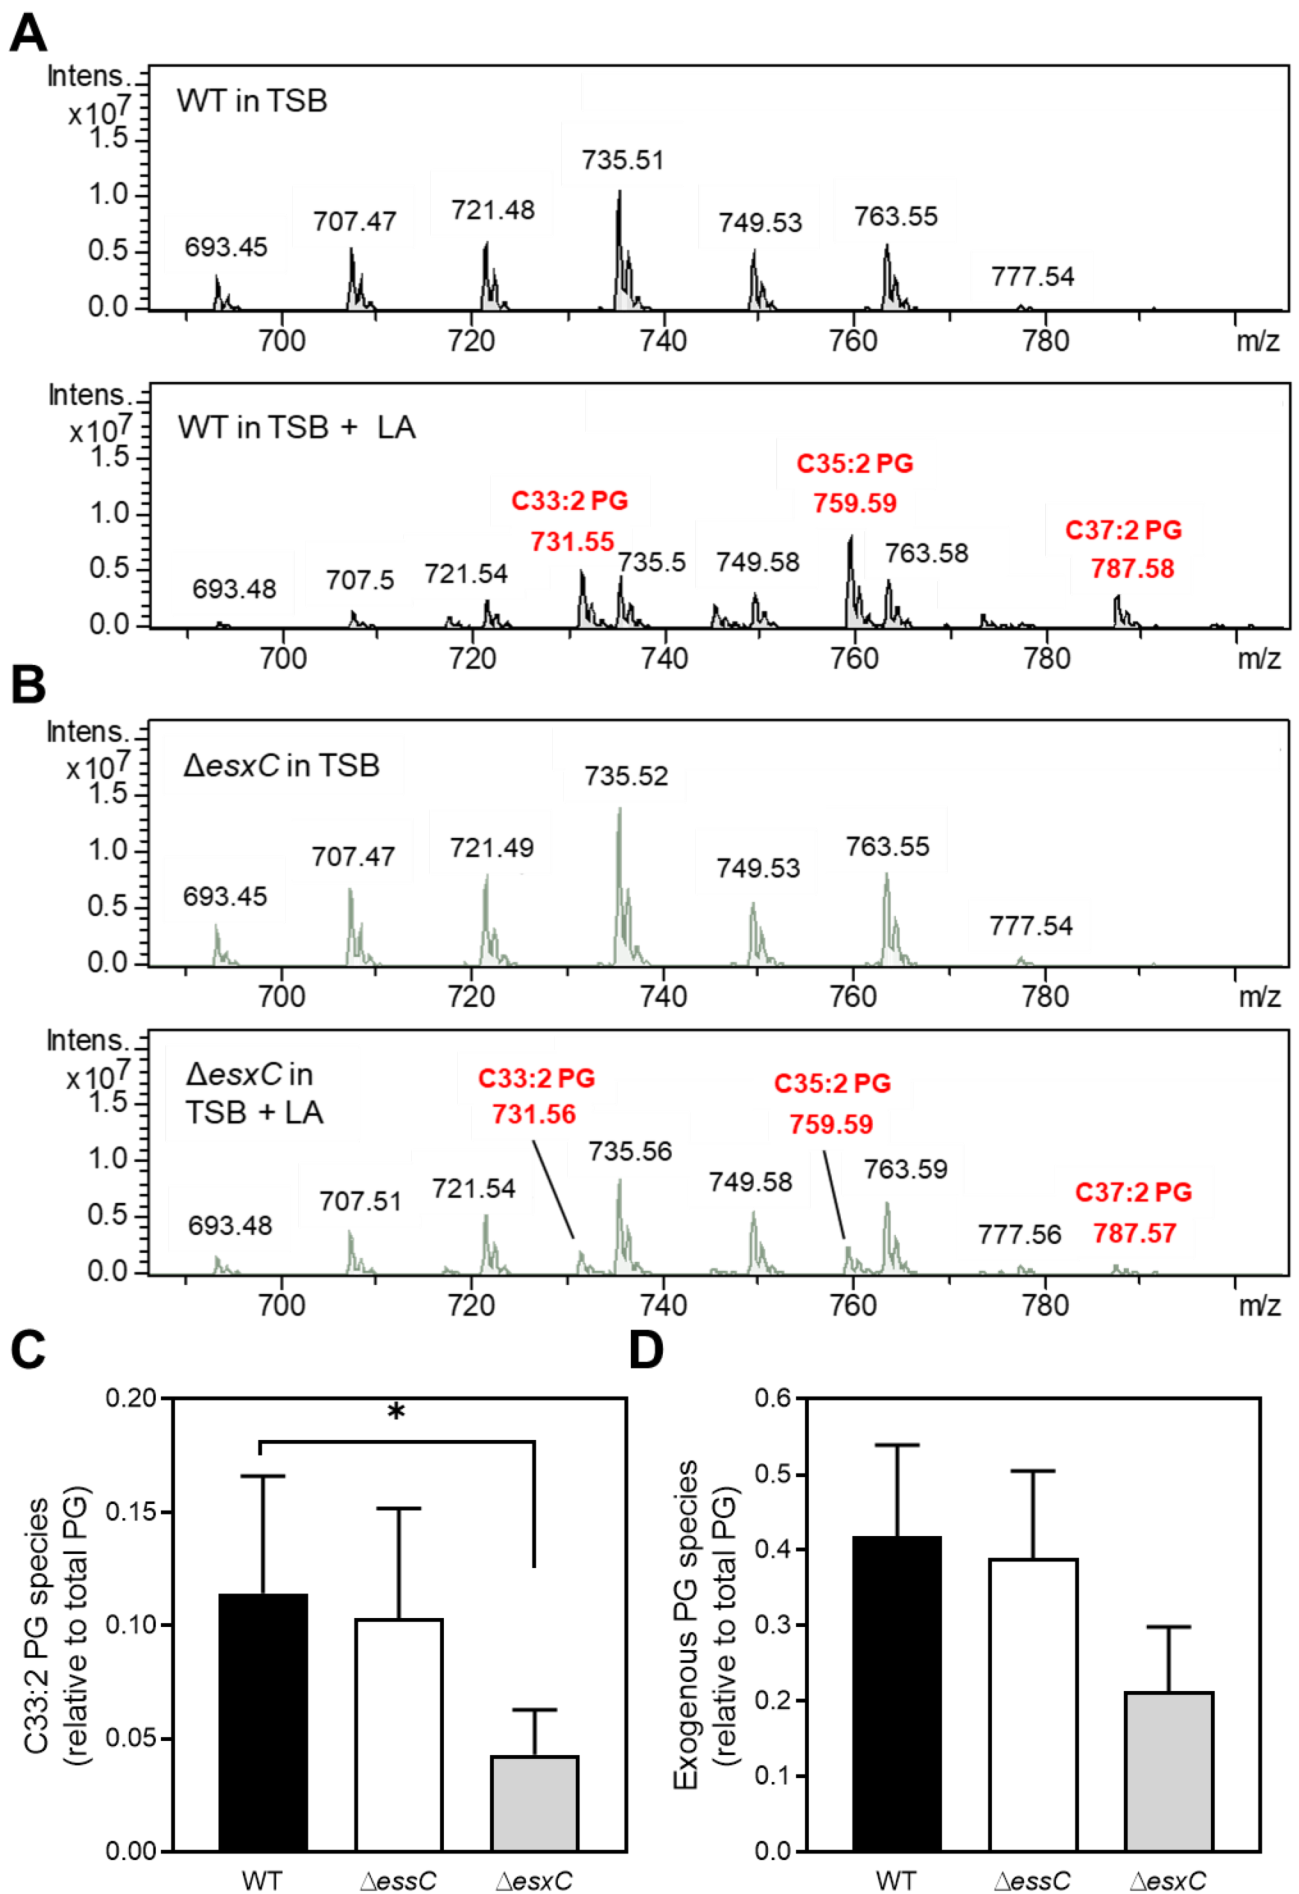

**Fig 5**



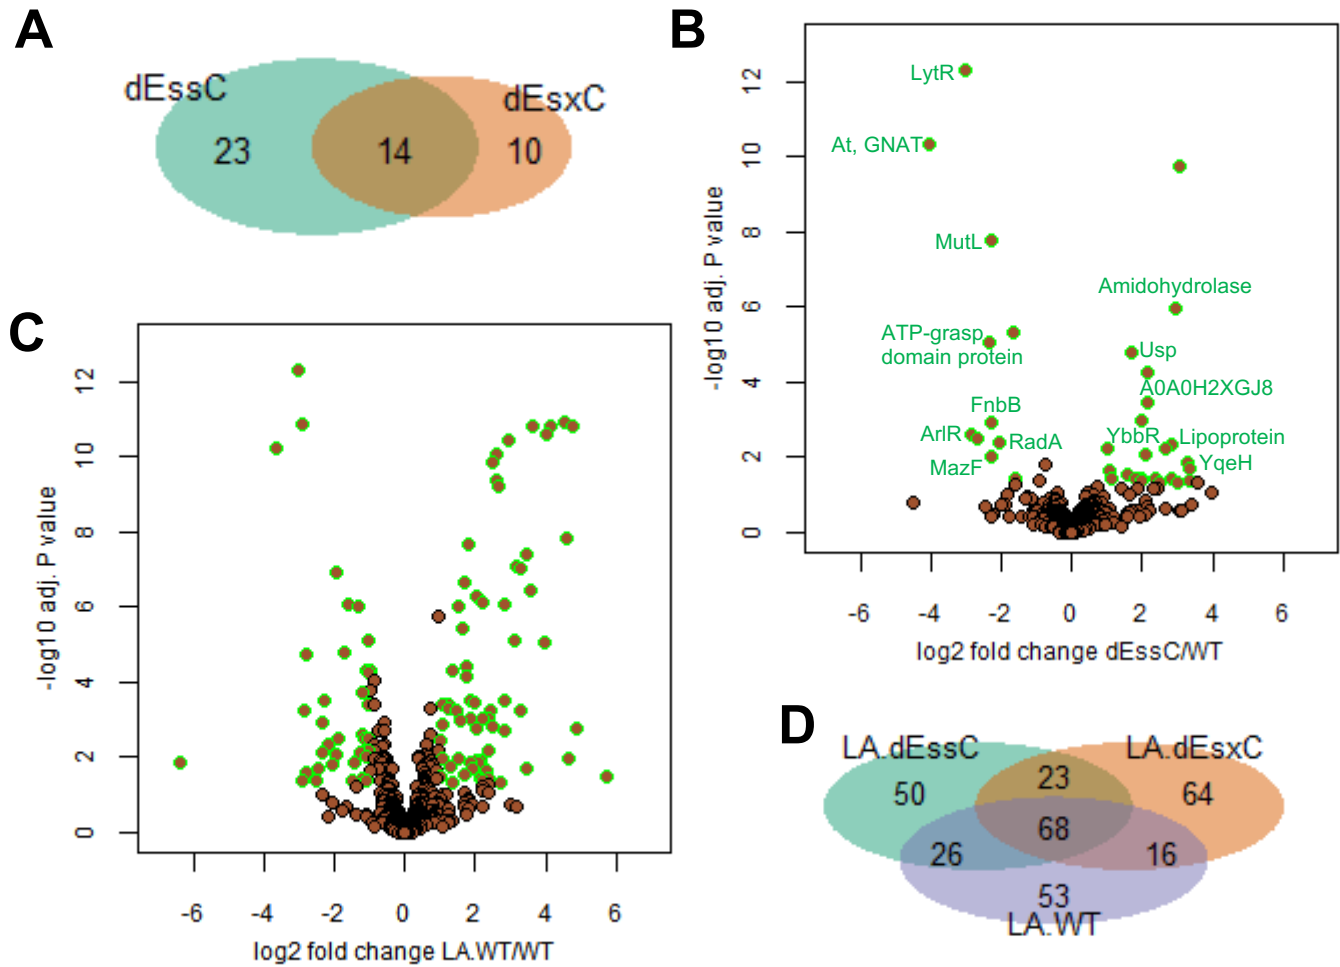

**Fig 6**

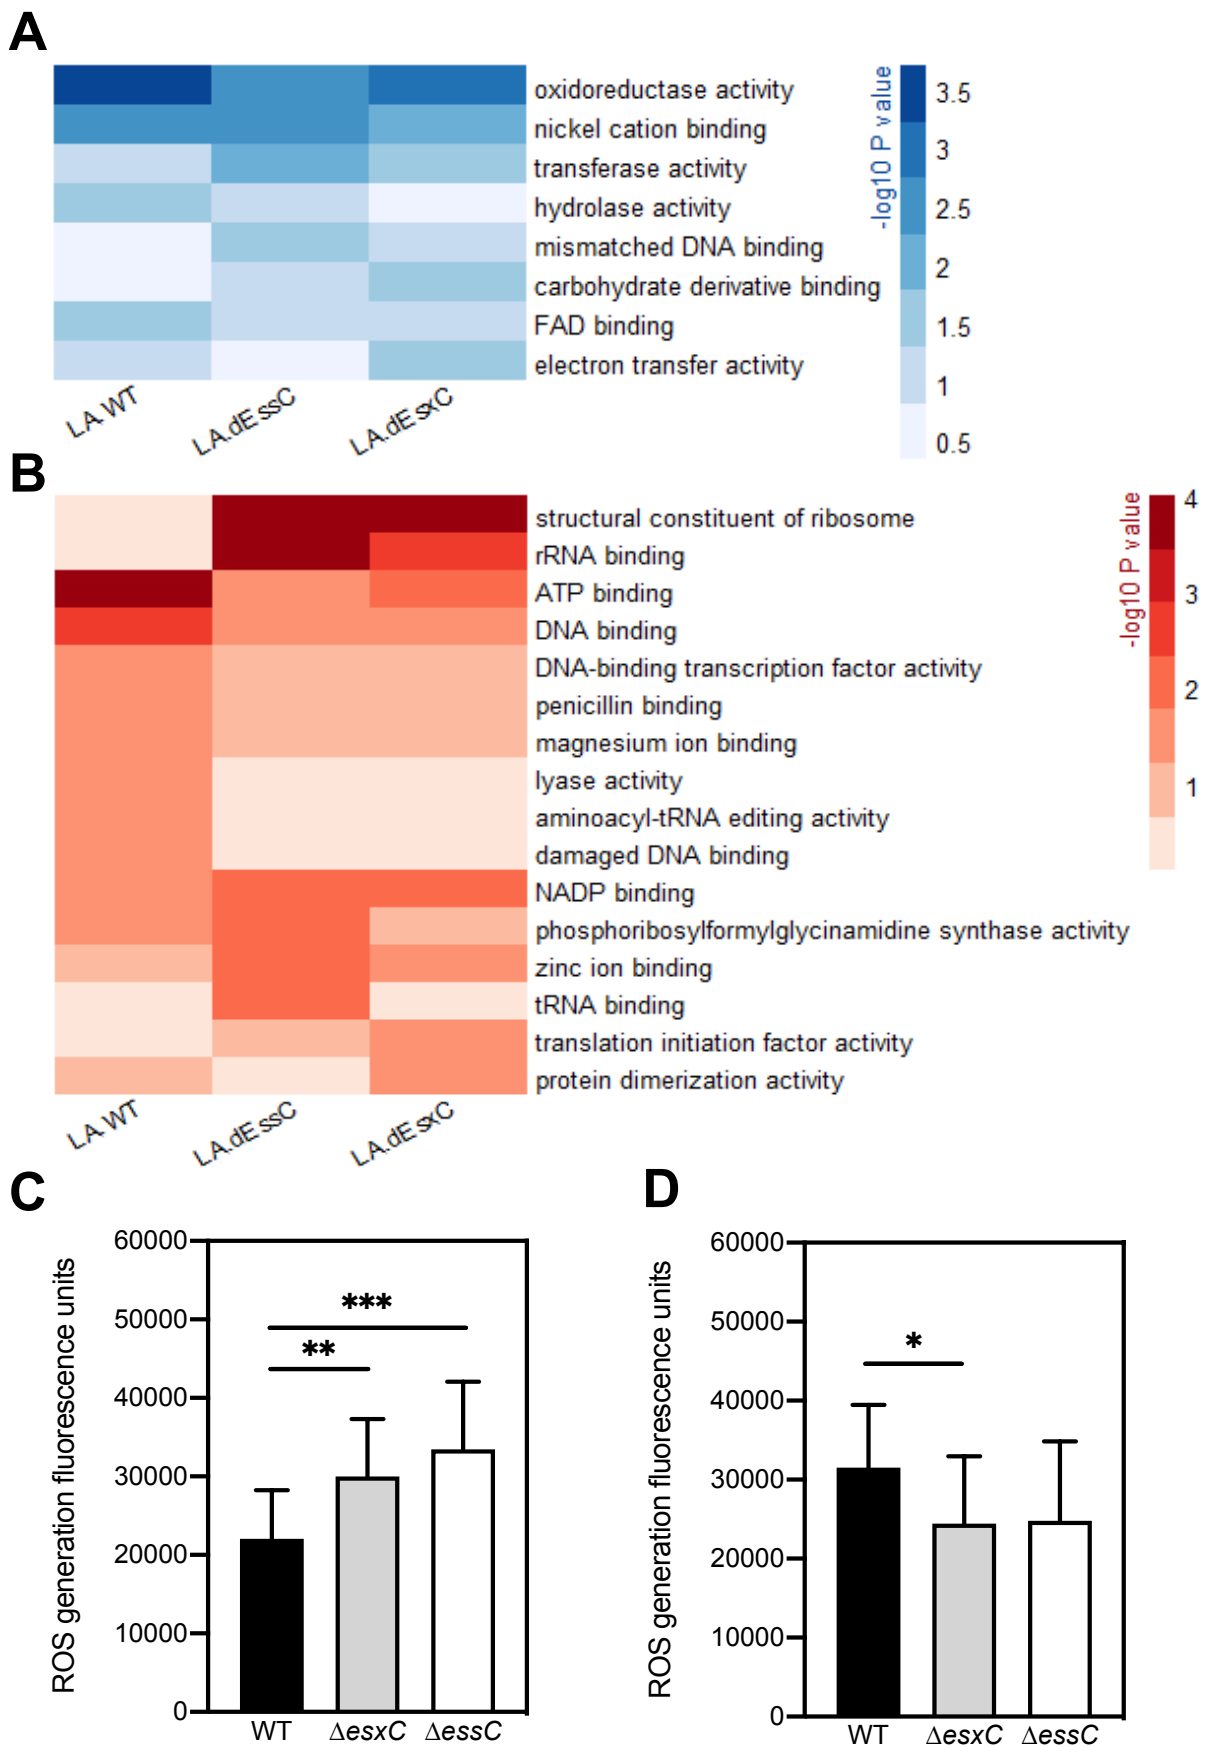

**Fig 7**
